# Supplementary material for: trans-Hydrogenation: Application to a Concise and Scalable Synthesis of Brefeldin A
Source: PubMed Central journal article supplement (PMC4471581; doi:10.1002/anie.201411618), 2015-02-04

Supporting Information

***trans*-Hydrogenation: Application to a Concise and Scalable Synthesis  
of Brefeldin A\*\***

*Michael Fuchs and Alois Fürstner\**

anie\_201411618\_sm\_miscellaneous\_information.pdf

## TOTAL SYNTHESIS OF BREFELDIN A

| Autor (*)      | Year <sup>[a]</sup> | Ref. | shown substrate <sup>[b]</sup>                                                      | "real" substrate <sup>[c]</sup>                                                    | macrocyclization             |                   | Steps ( $\Sigma$ ) <sup>[d]</sup> | Amount <sup>[e]</sup> | Comments <sup>[f]</sup>                         |
|----------------|---------------------|------|-------------------------------------------------------------------------------------|------------------------------------------------------------------------------------|------------------------------|-------------------|-----------------------------------|-----------------------|-------------------------------------------------|
|                |                     |      |                                                                                     |                                                                                    | method                       | yield (%)         |                                   |                       |                                                 |
| Corey          | 1976                | 1    | 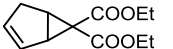   | cyclopentadiene                                                                    | lactonization                | nr                | ≈ 22                              | nr                    | racemic                                         |
| Bartlett       | 1978                | 2    |    |  | lactonization                | 37                | ≈ 17                              | 1 mg                  | racemic<br>Birch-reduction ( $\Delta^{10,11}$ ) |
| Kitahara, Mori | 1979                | 3    |    | mannitol & glutamic acid                                                           | lactonization                | 42                | ≈ 31                              | 2.9 mg                | Birch-reduction ( $\Delta^{10,11}$ )            |
| Greene         | 1980                | 4,5  |    | cyclopentadiene                                                                    | lactonization                | 70 <sup>[h]</sup> | ≈ 18                              | 16.1 mg               |                                                 |
| Winterfeldt    | 1980                | 6    |    | cyclopentadiene (?)                                                                | lactonization                | nr                | > 15                              | nr                    | racemic                                         |
| Yamaguchi      | 1981                | 7    |    |  | lactonization                | 94 <sup>[h]</sup> | ≈ 21                              | nr                    | racemic                                         |
| Gais           | 1984                | 8    |    |   | lactonization                | 74                | ≈ 24                              | nr                    | Birch-reduction ( $\Delta^{10,11}$ )            |
| Corey          | 1990                | 9    |    | cyclopentadiene                                                                    | lactonization <sup>[g]</sup> | nr                | ≈ 17                              | nr                    |                                                 |
| Takano         | 1990                | 10   |    |                                                                                    | lactonization                | 83                | ≈ 25                              | nr                    | Birch-reduction ( $\Delta^{10,11}$ )            |
| Taber          | 1991                | 11   |   |                                                                                    | lactonization                | 21 <sup>[i]</sup> | ≈ 23                              | 1.1 mg                |                                                 |
| Nokami         | 1991                | 12   |  | cyclopentadiene                                                                    | lactonization                | 80                | ≈ 16                              | nr                    |                                                 |
| Solladié       | 1993                | 13   |  | bis-(+)-menthyl fumarate                                                           | lactonization                | 50                | ≈ 38                              | 4.2 mg                |                                                 |
| Kajiwara       | 1994                | 14   |  |                                                                                    | lactonization                | 24 <sup>[i]</sup> | ≈ 22                              | nr                    | Birch-reduction ( $\Delta^{10,11}$ )            |

|         |      |    |                                                                                   |                                                                                   |                         |                   |      |         |                                                                             |
|---------|------|----|-----------------------------------------------------------------------------------|-----------------------------------------------------------------------------------|-------------------------|-------------------|------|---------|-----------------------------------------------------------------------------|
| Roberts | 1994 | 15 | 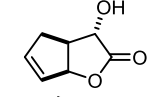 | cyclopentadiene                                                                   | lactonization           | 80                | ≈ 14 | 5.2 mg  |                                                                             |
| Haynes  | 1997 | 16 |  | cyclopentadiene (?)                                                               | lactonization           | 78                | > 16 | 5.9 mg  |                                                                             |
| Suh     | 1998 | 17 |  | malic acid                                                                        | lactonization           | 51                | ≈ 18 | 2.2 mg  |                                                                             |
| Romo    | 2002 | 18 |  |                                                                                   | HWE @ $\Delta^{2,3}$    | 41                | ≈ 15 | nr      |                                                                             |
| Kim     | 2002 | 19 |  | ethyl lactate                                                                     | nitrile-oxide cycloadd. | 78 <sup>[h]</sup> | ≈ 23 | 14.8 mg |                                                                             |
| Trost   | 2002 | 20 |  | furan                                                                             | lactonization           | 61                | ≈ 18 | 8.1 mg  | <i>trans</i> -reduction by hydro-silylation/desilylation ( $\Delta^{2,3}$ ) |
| Wu      | 2004 | 21 |  |                                                                                   | lactonization           | 81                | ≈ 16 | 14 mg   |                                                                             |
| Suh     | 2006 | 22 |  |  | HWE @ $\Delta^{2,3}$    | 59                | ≈ 15 | nr      |                                                                             |
| Tae     | 2009 | 23 |  |  | RCM @ $\Delta^{10,11}$  | 81                | ≈ 14 | 4.8 mg  |                                                                             |

[a] first appearance; “variants” are considered under one entry if the overall strategy is unchanged

[b] substrate with which the sequence described in the cited reference starts

[c] compound from which the substrate shown in the publication has been made according to the cited literature; not in all cases this may be the actual point of departure; (?) indicates cases, where the real starting material is not clear (best guess by the present authors)

[d] the step count is not necessarily unambiguous

[e] amount of brefeldin A shown in the Experimental Part of the publication

[f] strategic elements related to the present synthesis are indicated in blue

[g] also reports an attempted but unsuccessful macrocyclization via intramolecular 1,4-addition

[h] yield of a mixture of diastereomers

[i] yield over more than one step; the yield of the macrocyclization itself is not specified

nr = not reported; HWE = Horner-Wadsworth-Emmons olefination; RCM = ring closing alkene metathesis

## FORMAL TOTAL SYNTHESSES OF BREFELDIN A

| Autor (*)   | Year <sup>[a]</sup> | Ref. | shown Substrate <sup>[b]</sup>                                                      | "real" substrate <sup>[c]</sup>                                                      | Steps ( $\Sigma$ ) <sup>[d]</sup> | Comments                                                                |
|-------------|---------------------|------|-------------------------------------------------------------------------------------|--------------------------------------------------------------------------------------|-----------------------------------|-------------------------------------------------------------------------|
| Ohruj       | 1980                | 24   | 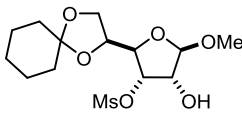   | glucose                                                                              | >> 20                             | intercepts ref. 7                                                       |
| Winterfeldt | 1981                | 25   |    | cyclopentadiene (?)                                                                  |                                   | racemic, HWE @ $\Delta^{2,3}$ (yield not reported)<br>intercepts ref. 6 |
| Greene      | 1982                | 5    |    |    | >> 13                             | racemic; intercepts ref. 1                                              |
| Isoe        | 1985                | 26   |    |    | $\approx$ 18                      | intercepts ref. 2                                                       |
| Sakai       | 1985                | 27   |    |    | >> 20                             | intercepts ref. 3                                                       |
| Trost       | 1986                | 28   |   | mannitol                                                                             | $\approx$ 20                      | intercepts ref. 1                                                       |
| Nakai       | 1995                | 29   |  |                                                                                      | $\approx$ 20                      | no route established at the time<br>is intercepted                      |
| Greene      | 1995                | 30   |  |  | $\approx$ 18                      | intercepts ref. 5                                                       |
| Kobayashi   | 1996                | 31   |  | cyclopentadiene (?)                                                                  | $\approx$ 15                      | intercepts ref. 2                                                       |

|            |      |    |                                                                                   |                       |      |                                                                                                              |
|------------|------|----|-----------------------------------------------------------------------------------|-----------------------|------|--------------------------------------------------------------------------------------------------------------|
| Mioskowski | 1999 | 32 | 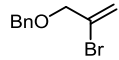 | propargyl alcohol (?) | > 20 | intercepts ref. 8a                                                                                           |
| Kim        | 2002 | 33 |  | tri-O-acetyl-D-glucal | ≈ 27 | intramol. nitrile-oxide cycloadd. (84%)<br><b>Birch-reduction</b> ( $\Delta^{10,11}$ )<br>intercepts ref. 19 |
| Kim        | 2002 | 33 |  | tri-O-acetyl-D-glucal | ≈ 22 | RCM @ $\Delta^{10,11}$ (42%, E:Z = 2.2:1); intercepts ref. 19                                                |
| Helmchen   | 2006 | 34 |  | 2-buten-1,4-diol      | ≈ 19 | intercepts ref. 11                                                                                           |
| Zercher    | 2007 | 35 |  | malic acid            | ≈ 17 | RCM @ $\Delta^{10,11}$ (64%, E:Z = 3.5:1) & ring expansion<br>intercepts ref. 19                             |
| other      |      | 36 |                                                                                   |                       |      |                                                                                                              |

- [a] first appearance; “variants” are considered under one entry if the overall strategy is unchanged
- [b] substrate with which the sequence described in the cited reference starts
- [c] compound from which the substrate shown in the publication has been made according to the cited literature; not in all cases this may be the actual point of departure; (?) indicates cases, where the real starting material is not clear (best guess by the present authors)
- [d] projected number of steps towards the final product if the synthesis were completed according to the intercepted route; the step count is not necessarily unambiguous

## TOTAL AND FORMAL SYNTHESSES OF BREFELDIN C

| Autor (*) | Year <sup>[a]</sup> | Ref. | shown Substrate <sup>[b]</sup>                                                    | “real” substrate <sup>[c]</sup>                                                    | Macrocyclization (yield %) | Steps ( $\Sigma$ ) <sup>[d]</sup> | Amount <sup>[e]</sup> | Comments <sup>[f]</sup>              |
|-----------|---------------------|------|-----------------------------------------------------------------------------------|------------------------------------------------------------------------------------|----------------------------|-----------------------------------|-----------------------|--------------------------------------|
| Schreiber | 1988                | 37   |  |                                                                                    | NHK (60%)                  | ≈ 16                              | ≈ 5 mg                |                                      |
| Takano    | 1989                | 38   |  |                                                                                    | lactonization (85%)        | ≈ 22                              | nr                    | Birch-reduction ( $\Delta^{10,11}$ ) |
| Guingant  | 2005                | 39   |  |  | lactonization (79%)        | ≈ 18                              | 50 mg                 |                                      |
| Tsunoda   | 2011                | 40   |  |  | lactonization (89%)        | ≈ 23                              | nr                    |                                      |

[a] first appearance; “variants” are considered under one entry if the overall strategy is unchanged

[b] substrate with which the sequence described in the cited reference starts

[c] compound from which the substrate shown in the publication has been made according to the cited literature; not in all cases this may be the actual point of departure; (?) indicates cases, where the real starting material is not clear (best guess by the present authors)

[d] the step count is not necessarily unambiguous

[e] amount of brefeldin A shown in the Experimental Part

[f] strategic elements related to the present synthesis are indicated in blue

nr = not reported; NHK = Nozaki-Hiyama-Kishi reaction

## A SELECTION OF SIGNIFICANT ANALOGUES

| Autor (*) | Year      | Ref.  | Structure <sup>[a]</sup>                                                              | Amount                                                          |
|-----------|-----------|-------|---------------------------------------------------------------------------------------|-----------------------------------------------------------------|
| Hori      | 1997/2000 | 41    | various derivatives                                                                   | prepared by derivatization of BFA                               |
| Cushman   | 1998      | 42    | various prodrugs                                                                      | prepared by derivatization of BFA                               |
| Helmchen  | 2006      | 34    | 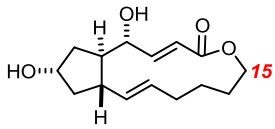   | nr                                                              |
| Helmchen  | 2006      | 34    |    | nr                                                              |
| Wu        | 2008      | 43    |    | 14 mg                                                           |
| Helmchen  | 2008/2011 | 44,45 |   | 14.3 mg (for total synthesis)<br>125 mg (via partial synthesis) |
| Guingant  | 2010      | 39a   |  | 58 mg                                                           |
| Helmchen  | 2011      | 45    |  | 10.8 mg                                                         |

|          |      |    |                                                                                     |                                                                                                                                                                                                                                                                                                 |
|----------|------|----|-------------------------------------------------------------------------------------|-------------------------------------------------------------------------------------------------------------------------------------------------------------------------------------------------------------------------------------------------------------------------------------------------|
| Helmchen | 2011 | 45 | 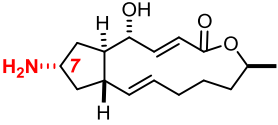 | 23 mg (via partial synthesis)                                                                                                                                                                                                                                                                   |
| Helmchen | 2013 | 46 |   | R = Et, 43 mg<br>R = CF <sub>3</sub> , 18.8 mg<br>R = vinyl, 78.6 mg<br>Ar = Ph, 42 mg<br>Ar = 1-naphthyl, 25.8 mg<br>Ar = 6-quinoliny, 21.4 mg<br>Ar = 4-dimethylaminophenyl, 18.7 mg<br>Ar = 4-trifluoromethylphenyl, 37.4 mg,<br>Ar = 4-fluoromethyl, 33.4 mg<br>(all via partial synthesis) |

[a] modified site and/or modification relative to the natural product shown in red



- 
- 1 a) E. J. Corey, R. H. Wollenberg, *Tetrahedron Lett.* **1976**, 4705-4708; b) for a modification, see:  
E. J. Corey, R. H. Wollenberg, D. R. Williams, *Tetrahedron Lett.* **1977**, 2243-2246.
- 2 P. A. Bartlett, F. R. Green, *J. Am. Chem. Soc.* **1978**, *100*, 4858-4865.
- 3 a) T. Kitahara, K. Mori, M. Matsui, *Tetrahedron Lett.* **1979**, *20*, 3021-3024; b) T. Kitahara, K.  
Mori, *Tetrahedron* **1984**, *40*, 2935-2944.
- 4 A. E. Greene, C. Le Drian, P. Crabbé, *J. Am. Chem. Soc.* **1980**, *102*, 7583-7584.
- 5 C. Le Drian, A. E. Greene, *J. Am. Chem. Soc.* **1982**, *104*, 5473-5483.
- 6 a) Y. Köksal, P. Raddatz, E. Winterfeldt, *Angew. Chem.* **1980**, *92*, 486-487; *Angew. Chem. Int.*  
*Ed. Engl.* **1980**, *19*, 472-473; b) Y. Köksal, P. Raddatz, E. Winterfeldt, *Liebigs Ann. Chem.* **1984**,  
450-461.
- 7 M. Honda, K. Hirata, H. Sueoka, T. Katsuki, M. Yamaguchi, *Tetrahedron Lett.* **1981**, *22*, 2679-  
2682.
- 8 a) H.-J. Gais, T. Lied, *Angew. Chem.* **1984**, *96*, 143-145; *Angew. Chem. Int. Ed. Engl.* **1984**, *23*,  
145-146; b) H.-J. Gais, K. L. Lukas, *Angew. Chem.* **1984**, *96*, 140-141; *Angew. Chem. Int. Ed.*  
*Engl.* **1984**, *23*, 142-143.
- 9 E. J. Corey, P. Carpino, *Tetrahedron Lett.* **1990**, *31*, 7555-7558.
- 10 S. Hatakeyama, K. Sugawara, M. Kawamura, S. Takano, *Synlett* **1990**, 691-693.
- 11 D. F. Taber, L. J. Silverberg, E. D. Robinson, *J. Am. Chem. Soc.* **1991**, *113*, 6639-6645.
- 12 J. Nokami, M. Ohkura, Y. Dan-Oh, Y. Sakamoto, *Tetrahedron Lett.* **1991**, *32*, 2409-2412.
- 13 G. Solladié, O. Lohse, *J. Org. Chem.* **1993**, *58*, 4555-4563.
- 14 H. Miyaoka, M. Kajiwara, *J. Chem. Soc. Chem. Commun.* **1994**, 483-484.
- 15 a) G. Casy, G. Gorins, R. McCague, H. F. Olivo, S. M. Roberts, *J. Chem. Soc. Chem. Commun.*  
**1994**, 1085-1086; b) A. J. Carnell, G. Casy, G. Gorins, A. Kompany-Saeid, R. McCague, H. F.  
Olivo, S. M. Roberts, A. J. Willetts, *J. Chem. Soc. Perkin Trans. I* **1994**, 3431-3439.
- 16 R. K. Haynes, W. W.-L Lam, L.-L. Yeung, I. D. Williams, A. C. Ridley, S. M. Starling, S. C. Vonwiller,  
T. W. Hambley, P. Lelandais, *J. Org. Chem.* **1997**, *62*, 4552-4553.
- 17 a) Y.-G. Suh, J.-K. Jung, B.-C. Suh, Y.-C. Lee, S.-A. Kim, *Tetrahedron Lett.* **1998**, *39*, 5377-5380; b)  
Y.-G. Suh, J.-K. Jung, S.-Y. Seo, K.-H. Min, D.-Y. Shin, Y.-S. Lee, S.-H. Kim, H.-J. Park, *J. Org. Chem.*  
**2002**, *67*, 4127-4137; c) Y.-G. Suh, S.-Y. Seo, J.-K. Jung, O.-H. Park, R.-O. Jeon, *Tetrahedron Lett.*  
**2001**, *42*, 1691-1694.
- 18 Y. Wang, D. Romo, *Org. Lett.* **2002**, *4*, 3231-3234.
- 19 D. Kim, J. Lee, P. J. Shim, J. I. Lim, H. Jo, S. Kim, *J. Org. Chem.* **2002**, *67*, 764-771.
- 20 a) B. M. Trost, M. L. Crawley, *J. Am. Chem. Soc.* **2002**, *124*, 9328-9329; b) B. M. Trost, M. L.  
Crawley, *Chem. Eur. J.* **2004**, *10*, 2237-2252.
- 21 a) Y. Wu, J. Gao, *Org. Lett.* **2008**, *10*, 1533-1536; for a variant, see: b) Y. Wu, X. Shen, Y.-Q.  
Yang, Q. Hu, J.-H. Huang, *J. Org. Chem.* **2004**, *69*, 3857-3865; c) Y. Wu, X. Shen, Y.-Q. Yang, Q.  
Hu, J.-H. Huang, *Tetrahedron Lett.* **2004**, *45*, 199-202.
- 22 S.-Y. Seo, J.-K. Jung, S.-M. Paek, Y.-S. Lee, S.-H. Kim, Y.-G. Suh, *Tetrahedron Lett.* **2006**, *47*,  
6527-6539.
- 23 M.-Y. Kim, H. Kim, J. Tae, *Synlett* **2009**, 1303-1306.
- 24 H. Ohrui, H. Kuzuhara, *Agric. Biol. Chem.* **1980**, *44*, 907-912.
- 25 P. Raddatz, E. Winterfeldt, *Angew. Chem.* **1981**, *93*, 281-282; *Angew. Chem. Int. Ed. Engl.* **1981**,  
*20*, 286-287.
- 26 K. Nakatani, S. Isoe, *Tetrahedron Lett.* **1985**, *26*, 2209-2212.
- 27 K. Ueno, H. Suemune, S. Saeki, K. Sakai, *Chem. Pharm. Bull.* **1985**, *33*, 4021-4025.

- 
- 28 B. M. Trost, J. Lynch, P. Renaut, D. H. Steinman, *J. Am. Chem. Soc.* **1986**, *108*, 284-291.
- 29 K. Tomooka, K. Ishikawa, T. Nakai, *Synlett* **1995**, 901-902.
- 30 V. Bernardes, N. Kann, A. Riera, A. Moyano, M. A. Pericas, A. E. Greene, *J. Org. Chem.* **1995**, *60*, 6670-6671.
- 31 Y. Kobayashi, K. Watatani, Y. Kikori, R. Mizojiri, *Tetrahedron Lett.* **1996**, *37*, 6125-6128.
- 32 P. Ducray, B. Rousseau, C. Mioskowski, *J. Org. Chem.* **1999**, *64*, 3800-3801.
- 33 D. Kim, J. Lee, P. J. Shim, J. I. Lim, T. Doi, S. Kim, *J. Org. Chem.* **2002**, *67*, 772-781.
- 34 T. Hübscher, G. Helmchen, *Synlett* **2006**, 1323-1326.
- 35 W. Lin, C. K. Zercher, *J. Org. Chem.* **2007**, *72*, 4390-4395.
- 36 For other studies towards the brefeldins, see: a) D. B. Ramachary, Y. V. Reddy, *J. Org. Chem.* **2010**, *75*, 74-85; b) D. P. Curran, D. Scholz, *Monatsh. Chem.* **1977**, *108*, 1401-1411; c) T. Livinghouse, R. V. Stevens, *J. Chem. Soc. Chem. Commun.* **1978**, 754-756; d) R. Baker, R. B. Keen, M. D. Morris, R. W. Turner, *J. Chem. Soc. Chem. Commun.* **1984**, 987-988; e) K. Nakamura, T. Kitayama, Y. Inoue, A. Ohno, *Bull. Chem. Soc. Jpn.* **1990**, *63*, 91-96.
- 37 S. L. Schreiber, H. V. Meyers, *J. Am. Chem. Soc.* **1988**, *110*, 5198-5200.
- 38 S. Hatakeyama, K. Osanai, H. Numata, S. Takano, *Tetrahedron Lett.* **1989**, *30*, 4845-4848.
- 39 a) S. Archambaud, F. Legrand, K. Aphecetche-Julienne, S. Collet, A. Guingant, M. Evain, *Eur. J. Org. Chem.* **2010**, 1364-1380; b) S. Archambaud, K. Aphecetche-Julienne, A. Guingant, *Synlett* **2005**, 139-143; c) F. Legrand, S. Archambaud, S. Collet, K. Aphecetche-Julienne, A. Guingant, M. Evain, *Synlett* **2008**, 389-393.
- 40 M. Inai, T. Nishii, S. Mukoujima, T. Esumi, H. Kaku, K. Tominaga, H. Abe, M. Horikawa, T. Tsunoda, *Synlett* **2011**, 1459-1461.
- 41 a) J.-W. Zhu, H. Nagasawa, F. Nagura, S. B. Mohamad, Y. Uto, K. Ohkura, H. Hori, *Bioorg. Med. Chem.* **2000**, *8*, 455-463; b) J.-W. Zhu, H. Hori, H. Nojiri, T. Tsukuda, Z. Taira, *Bioorg. Med. Chem. Lett.* **1997**, *7*, 139-144.
- 42 A. B. Argade, R. Devraj, J. A. Vroman, R. D. Haugwitz, M. Hollingshead, M. Cushman, *J. Med. Chem.* **1998**, *41*, 3337-3346.
- 43 J. Gao, Y.-X. Huang, Y. Wu, *Tetrahedron* **2008**, *64*, 11105-11109.
- 44 S. Förster, G. Helmchen, *Synlett* **2008**, 831-836.
- 45 S. Förster, E. Persch, O. Tverskoy, F. Rominger, G. Helmchen, C. Klein, B. Gönen, B. Brügger, *Eur. J. Org. Chem.* **2011**, 878-891.
- 46 K. Seehafer, F. Rominger, G. Helmchen, M. Langhans, D. G. Robinson, B. Özata, B. Brügger, J. R. P. M. Strating, F. J. M. van Kuppeveld, C. D. Klein, *J. Med. Chem.* **2013**, *56*, 5872-5884.

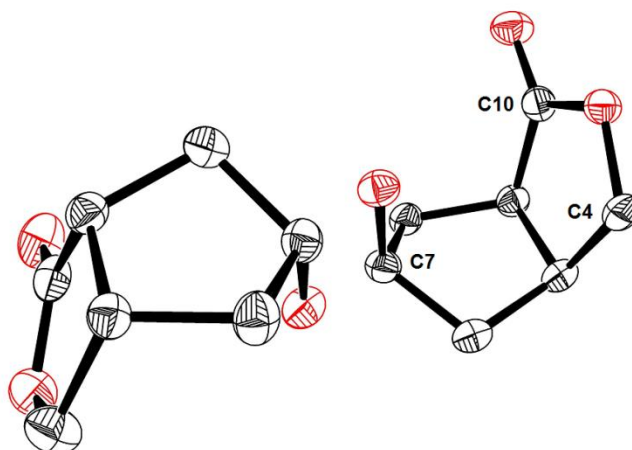

**Figure S-1.** Structure of compound **8** in the solid state; anisotropic displacement parameters are drawn at the 50% probability level, hydrogen atoms are omitted for clarity; brefeldin numbering scheme (CCDC-1036054)

**X-ray Crystal Structure Analysis of Compound 8:**  $C_7H_{10}O_3$ ,  $M_r = 142.15 \text{ g} \cdot \text{mol}^{-1}$ , colorless plate, crystal size 0.32 x 0.19 x 0.12 mm, monoclinic, space group  $P2_1$ ,  $a = 5.3098(4) \text{ \AA}$ ,  $b = 10.2790(7) \text{ \AA}$ ,  $c = 12.3060(9) \text{ \AA}$ ,  $\beta = 97.493(4)^\circ$ ,  $V = 665.92(8) \text{ \AA}^3$ ,  $T = 100 \text{ K}$ ,  $Z = 4$ ,  $D_{calc} = 1.418 \text{ g} \cdot \text{cm}^3$ ,  $\lambda = 1.54178 \text{ \AA}$ ,  $\mu(Cu-K\alpha) = 0.930 \text{ mm}^{-1}$ , Empirical absorption correction ( $T_{min} = 0.77$ ,  $T_{max} = 0.90$ ), Bruker AXS X8 Proteum diffractometer,  $3.623 < \theta < 66.290^\circ$ , 14753 measured reflections, 2300 independent reflections, 2182 reflections with  $I > 2\sigma(I)$ , Structure solved by direct methods and refined by full-matrix least-squares against  $F^2$  to  $R_1 = 0.030 [I > 2\sigma(I)]$ ,  $wR_2 = 0.078$ , 183 parameters, H atoms riding, absolute structure parameter = 0.0(2),  $S = 1.040$ , residual electron density 0.2 / -0.2  $e \text{ \AA}^{-3}$ .

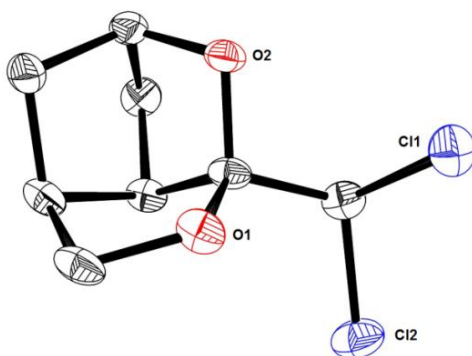

**Figure S-2.** Structure of adduct **12** in the solid state; anisotropic displacement parameters are drawn at the 50% probability level, hydrogen atoms are omitted for clarity (CCDC-1036055)

**X-ray Crystal Structure Analysis of Compound 12:**  $C_8H_{10}Cl_2O_2$ ,  $M_r = 209.06 \text{ g} \cdot \text{mol}^{-1}$ , colorless plate, crystal size 0.21 x 0.20 x 0.17 mm, orthorhombic, space group  $P2_12_12_1$ ,  $a = 8.0685(5) \text{ \AA}$ ,  $b = 9.3727(5) \text{ \AA}$ ,  $c = 11.7206(7) \text{ \AA}$ ,  $V = 886.35(9) \text{ \AA}^3$ ,  $T = 100 \text{ K}$ ,  $Z = 4$ ,  $D_{calc} = 1.567 \text{ g} \cdot \text{cm}^3$ ,  $\lambda = 1.54178 \text{ \AA}$ ,  $\mu(Cu-K\alpha) = 6.234 \text{ mm}^{-1}$ , Empirical absorption correction ( $T_{min} = 0.34$ ,  $T_{max} = 0.49$ ), Bruker AXS X8 Proteum

diffractometer,  $6.045 < \theta < 67.622^\circ$ , 40841 measured reflections, 1594 independent reflections, 1587 reflections with  $I > 2\sigma(I)$ , Structure solved by direct methods and refined by full-matrix least-squares against  $F^2$  to  $R_1 = 0.025 [I > 2\sigma(I)]$ ,  $wR_2 = 0.061$ , 109 parameters, absolute structure parameter = 0.012(5), H atoms riding,  $S = 1.098$ , residual electron density 0.1 / -0.3 e  $\text{\AA}^{-3}$ .

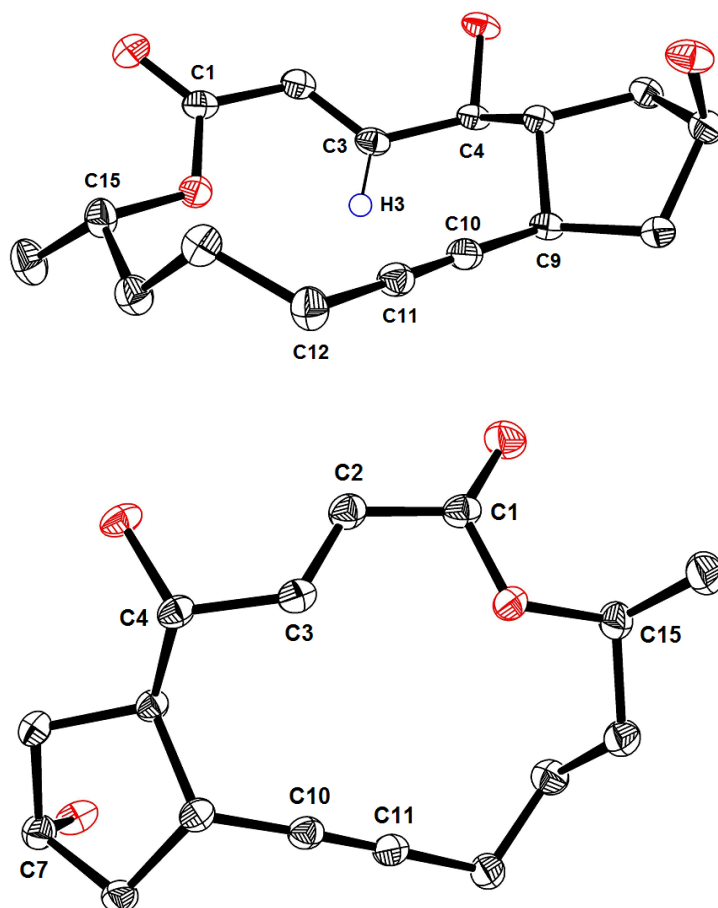

**Figure S-3.** Structure of cycloalkyne **20** in the solid state in two different orientations; anisotropic displacement parameters are drawn at the 50% probability level; except for H3 shown in the top projection, all hydrogen atoms are omitted for clarity (**CCDC-1036056**)

**X-ray Crystal Structure Analysis of Compound 20:**  $C_{16}H_{22}O_4$ ,  $M_r = 278.33 \text{ g} \cdot \text{mol}^{-1}$ , colorless plate, crystal size 0.21 x 0.11 x 0.07 mm, orthorhombic, space group  $P2_12_12_1$ ,  $a = 7.4004(2) \text{ \AA}$ ,  $b = 10.6316(3) \text{ \AA}$ ,  $c = 18.5415(5) \text{ \AA}$ ,  $V = 1458.81(7) \text{ \AA}^3$ ,  $T = 100 \text{ K}$ ,  $Z = 4$ ,  $D_{calc} = 1.267 \text{ g} \cdot \text{cm}^{-3}$ ,  $\lambda = 1.54178 \text{ \AA}$ ,  $\mu(Cu-K\alpha) = 0.732 \text{ mm}^{-1}$ , Semi-empirical absorption correction ( $T_{min} = 0.87$ ,  $T_{max} = 0.95$ ), Bruker AXS X8 Proteum diffractometer,  $4.770 < \theta < 67.815^\circ$ , 65420 measured reflections, 2618 independent reflections, 2541 reflections with  $I > 2\sigma(I)$ , Structure solved by direct methods and refined by full-matrix least-squares against  $F^2$  to  $R_1 = 0.032 [I > 2\sigma(I)]$ ,  $wR_2 = 0.078$ , 190 parameters, absolute structure parameter = 0.07(6), H atoms riding,  $S = 1.108$ , residual electron density 0.1 / -0.2 e  $\text{\AA}^{-3}$ .

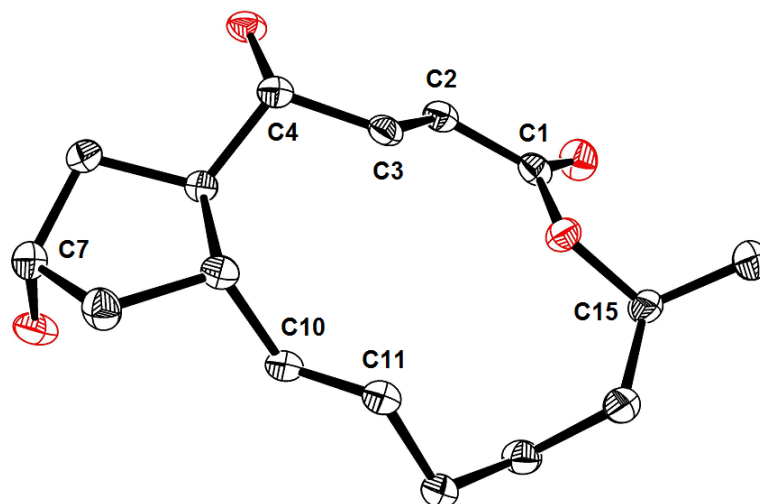

**Figure S-4.** Structure of brefeldin A (**1**) in the solid state; anisotropic displacement parameters are drawn at the 50% probability level, hydrogen atoms are omitted for clarity (CCDC- 1036057)<sup>1</sup>

**X-ray Crystal Structure Analysis of 9022:** C<sub>16</sub> H<sub>24</sub> O<sub>4</sub>,  $M_r = 280.35 \text{ g} \cdot \text{mol}^{-1}$ , colorless plate, crystal size 0.187 x 0.172 x 0.040 mm, orthorhombic, space group  $P2_12_12_1$ ,  $a = 7.3601(3) \text{ \AA}$ ,  $b = 10.8657(5) \text{ \AA}$ ,  $c = 18.7697(9) \text{ \AA}$ ,  $V = 1501.06(12) \text{ \AA}^3$ ,  $T = 100 \text{ K}$ ,  $Z = 4$ ,  $D_{\text{calc}} = 1.241 \text{ g} \cdot \text{cm}^3$ ,  $\lambda = 1.54178 \text{ \AA}$ ,  $\mu(\text{Cu-K}\alpha) = 0.712 \text{ mm}^{-1}$ , Empirical absorption correction ( $T_{\text{min}} = 0.90$ ,  $T_{\text{max}} = 0.97$ ), Bruker AXS X8 Proteum diffractometer,  $4.702 < \theta < 67.536^\circ$ , 62428 measured reflections, 2704 independent reflections, 2644 reflections with  $I > 2\sigma(I)$ , Structure solved by direct methods and refined by full-matrix least-squares against  $F^2$  to  $R_1 = 0.030 [I > 2\sigma(I)]$ ,  $wR_2 = 0.072$ , 198 parameters, absolute structure parameter = 0.00(6), H atoms riding,  $S = 1.096$ , residual electron density 0.1 / -0.2 e  $\text{\AA}^{-3}$ .

CCDC-1036054 (**8**), CCDC-1036055 (**12**), CCDC-1036056 (**20**) and CCDC-1036057 (**1**) contain the supporting crystallographic data for this paper. These data can be obtained free of charge from the Cambridge Crystallographic Data Centre via [www.ccdc.cam.ac.uk/data\\_request/cif](http://www.ccdc.cam.ac.uk/data_request/cif).

<sup>1</sup> For a previous report on the X-ray structure of brefeldin A, see: H. P. Weber, D. Hauser, H. P. Sigg, *Helv. Chim. Acta* **1971**, *54*, 2763-2766.

**General.** Unless stated otherwise, all reactions were carried out under Ar in flame-dried glassware. The solvents were purified by distillation over the indicated drying agents and were transferred under Ar: THF, Et<sub>2</sub>O (Mg/anthracene), CH<sub>2</sub>Cl<sub>2</sub>, hexane, toluene (Na/K), dioxane, DMF, MeCN, NEt<sub>3</sub> and pyridine were dried by an adsorption solvent purification system based on molecular sieves. Thin layer chromatography (TLC): Macherey-Nagel precoated plates (POLYGRAM® SIL/UV254); Flash chromatography: Merck silica gel 60 (40–63 μm) with predistilled or HPLC grade solvents. NMR: Spectra were recorded on Bruker DPX 300, AV400, AV500 or AVIII 600 spectrometer in the solvents indicated; chemical shifts (δ) are given in ppm relative to TMS, coupling constants (*J*) in Hz. The solvent signals were used as references and the chemical shifts converted to the TMS scale (CDCl<sub>3</sub>: δ<sub>C</sub> ≡ 77.16 ppm; residual CHCl<sub>3</sub> in CDCl<sub>3</sub>: δ<sub>H</sub> ≡ 7.26 ppm; [D<sub>4</sub>]-MeOH: δ<sub>C</sub> ≡ 49.00 ppm; residual CHD<sub>2</sub>OD in [D<sub>4</sub>]-methanol: δ<sub>H</sub> ≡ 3.31 ppm; [D<sub>6</sub>]-DMSO: δ<sub>C</sub> ≡ 39.52 ppm; residual [D<sub>5</sub>]-DMSO: δ<sub>H</sub> ≡ 2.50 ppm); IR: Spectrum One (Perkin-Elmer) spectrometer, wavenumbers (ν̄) in cm<sup>-1</sup>; MS (EI): Finnigan MAT 8200 (70 eV), ESI-MS: ESQ 3000 (Bruker), accurate mass determinations: Bruker APEX III FT-MS (7 T magnet) or Mat 95 (Finnigan). Optical rotations ( $[\alpha]_D^{20}$ ) were measured with a Perkin-Elmer Model 343 polarimeter. Unless stated otherwise, all commercially available compounds (Alfa Aesar, Aldrich, Fluka, Lancaster) were used as received. Complex **26**<sup>[1]</sup> and [Cp\*Ru(MeCN)<sub>3</sub>]PF<sub>6</sub><sup>[2]</sup> were prepared according to literature procedures.

**(1R,2S)-Diethyl cyclohex-4-ene-1,2-dicarboxylate (3).**<sup>[3]</sup> H<sub>2</sub>SO<sub>4</sub> (conc., 25 mL, 469 mmol) was added

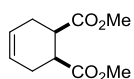

to a solution of *cis*-1,2,3,6-tetrahydrophthalic anhydride (60.0 g, 394 mmol) in MeOH (600 mL) and the resulting mixture was stirred overnight at reflux temperature. The mixture was then concentrated under reduced pressure and the remaining oil diluted

with water (100 mL). Solid NaHCO<sub>3</sub> was carefully added until the pH was neutral. The aqueous phase was extracted with *tert*-butyl methyl ether (4 x 100 mL), and the combined organic phases were dried over Na<sub>2</sub>SO<sub>4</sub>, filtered and concentrated to give product **3** as a clear oil (75.0 g, 96%). <sup>1</sup>H NMR (400 MHz, CDCl<sub>3</sub>): δ = 5.65 (s, 2H), 3.67 (s, 6H), 3.02 (t, *J* = 5.3, 2H), 2.53 (dd, *J* = 5.3, 16.2 Hz, 2H), 2.32 (dd, *J* = 5.3, 16.2 Hz, 2H); <sup>13</sup>C NMR (100 MHz, CDCl<sub>3</sub>): δ = 173.8, 125.2, 51.9, 39.8, 25.8; IR (film) ν̄ = 3029, 2952, 2848, 1729, 1435, 1200, 1163, 1025, 660; MS (EI): *m/z*: 198 (0.25), 167 (14), 138 (35), 107 (9), 91 (1), 79 (100), 59 (9); HRMS (ESI): *m/z*: calc. for C<sub>10</sub>H<sub>14</sub>O<sub>4</sub>Na: 221.0784 [M+Na]<sup>+</sup>, found: 221.0785.

**(1R,6S)-6-(Methoxycarbonyl)cyclohex-3-enecarboxylic acid (4).**<sup>[4]</sup> Diester **3** (74.5 g, 376 mmol) was

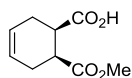

suspended in phosphate buffer (1340 mL, 100 mM, pH = 7.0). Pig liver esterase (10.9 kU, 728 mg lyophilized powder) and ammonium sulfate (3 M in water, 3.16 mL) were added and the pH was kept constant by addition of NaOH (1 M) *via* a pH-stat for 2 d. For

work up, the pH was adjusted to ≈ 10 by the addition of NaOH (1 M) and the obtained slurry was extracted with *tert*-butyl methyl ether (2 x 500 mL). The aqueous phase was acidified with conc. HCl until a pH 1 was reached, which led to significant precipitation of the enzyme. To facilitate the extraction, *tert*-butyl methyl ether (500 mL) was added and the mixture was filtered through a pad of Celite, which was carefully washed with water (100 mL) and *tert*-butyl methyl ether (100 mL). The

phases were separated and the aqueous phase was extracted with *tert*-butyl methyl ether (2 x 500 mL). The combined organic layers of the second extraction step (under acidic conditions) were dried over Na<sub>2</sub>SO<sub>4</sub>, filtered and concentrated to give compound **4** as a pale yellow oil (65.2 g, 94%).  $[\alpha]_D^{20} = +17.7$  [c = 1.0, EtOH, lit.:<sup>[5]</sup> +17.7 (c = 1.0, EtOH)]; <sup>1</sup>H NMR (400 MHz, CDCl<sub>3</sub>): δ = 5.67 (s, 2H), 3.69 (s, 3H), 3.10-3.03 (m, 2H), 2.61-2.54 (m, 2H), 2.40-2.33 (m, 2H); <sup>13</sup>C NMR (100 MHz, CDCl<sub>3</sub>): δ = 179.8, 173.8, 125.3, 125.2, 52.1, 39.7, 39.6, 25.9, 25.7; IR (film)  $\tilde{\nu}$  = 3100br, 3031, 2952, 2851, 1731, 1704, 1655, 1436, 1297, 1264, 1203, 1163, 1033, 736, 663; MS (EI): *m/z*: 184 (1), 166 (8), 153 (11), 138 (24), 124 (27), 107 (7), 97 (4), 79 (100); HRMS (ESI): *m/z*: calc. for C<sub>9</sub>H<sub>11</sub>O<sub>4</sub>Na<sub>2</sub>: 229.0447 [M+2Na]<sup>+</sup>, found: 229.0448.

**(3a*S*,7a*R*)-3a,4,7,7a-Tetrahydroisobenzofuran-1(3*H*)-one (5).**<sup>[6]</sup> A flame-dried round bottom flask

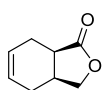

equipped with a dropping funnel was charged with LiEt<sub>3</sub>BH (1 M in THF, 608 mL, 608 mmol) under argon. The solution was cooled to 0 °C before a solution of compound **4** (28.0 g, 152 mmol) in THF (20 mL) was added over a period of 30 min. Once the addition was complete, the mixture was stirred for 1 h at 0 °C and for 3 h at room temperature. For work up, the mixture was cooled to 0 °C and the reaction was carefully quenched by addition of aq. HCl (6 M, 500 mL). The resulting mixture was stirred overnight before it was extracted with *tert*-butyl methyl ether (4 x 200 mL). The combined organic layers were dried over Na<sub>2</sub>SO<sub>4</sub>, filtered and concentrated. The residue was purified by flash chromatography (SiO<sub>2</sub>, pentane/*tert*-butyl methyl ether, 3/1) to give the title compound as colorless oil, which was dried under high vacuum for 1 h (20.5 g, 98%).  $[\alpha]_D^{20} = +49.7$  [c = 1.8, EtOAc, lit.:<sup>[6]</sup> +82.5 (c = 2.0, EtOAc)]; <sup>1</sup>H NMR (400 MHz, CDCl<sub>3</sub>): δ = 5.73 (s, 2H), 4.30 (dd, *J* = 5.2, 8.8 Hz, 1H), 4.01 (dd, *J* = 1.9, 8.8 Hz, 1H), 2.83-2.69 (m, 1H), 2.66-2.57 (m, 1H), 2.52-2.48 (m, 1H), 2.44-2.32 (m, 1H), 2.29-2.23 (m, 1H), 1.93-1.87 (m, 1H); <sup>13</sup>C NMR (100 MHz, CDCl<sub>3</sub>): δ = 179.2, 125.3, 124.9, 72.8, 37.4, 32.1, 24.8, 22.1; IR (film)  $\tilde{\nu}$  = 3031, 2969, 2905, 2843, 1763, 1480, 1435, 1372, 1197, 1173, 1132, 1040, 944, 663; MS (EI): *m/z*: 138 (41), 123 (9), 110 (5), 93 (100), 79 (89); HRMS (ESI): *m/z*: calc. for C<sub>8</sub>H<sub>10</sub>O<sub>2</sub>: 138.0681 [M]<sup>+</sup>, found: 138.0681.

**2,2'-[(3*R*,4*S*)-2-Oxotetrahydrofuran-3,4-diyl]diacetic acid (6).**<sup>[6]</sup> A solution of lactone **5** (200 mg, 1.45

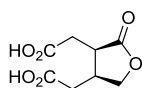

mmol) in acetone (1 mL) and added dropwise over a period of 1 h to a solution of KMnO<sub>4</sub> (699 mg, 4.42 mmol) in water (5 mL) at 0 °C. The brown slurry was stirred for 1 h at 0 °C, warmed to room temperature and stirred overnight. NaHSO<sub>3</sub> was added in order to destroy any remaining KMnO<sub>4</sub>. The resulting slurry was filtered through a pad of Celite and the filter cake carefully rinsed with water/THF (1/1, 25 mL). The combined filtrate was acidified to pH 2, saturated with NaCl and extracted with *tert*-butyl methyl ether/THF (2/3, 6 x 40 mL). The combined organic layers were dried over Na<sub>2</sub>SO<sub>4</sub>, filtered and concentrated under reduced pressure (the bath temperature must not exceed 30 °C). The remaining white solid material was dried under high vacuum and found pure enough for immediate further use (283 mg, 97%).

The reaction was also performed on much larger scale, using KMnO<sub>4</sub> (119.4 g, 0.76 mol) in water (650 mL) and lactone **5** (26.1 g, 189 mmol) in acetone (139 mL) to give analytically pure **6** (27.3 g, 71%) which analyzed as follows: m.p. = 162-164 °C (EtOAc, lit.<sup>[6]</sup> 144-157 °C);  $[\alpha]_D^{20} = -75.3$  [c = 1.0,

MeOH, lit.:<sup>[6]</sup> –85.3 (c = 3.29, MeOH)]; <sup>1</sup>H NMR (400 MHz, [D<sub>6</sub>]-DMSO): δ = 12.41 (bs, 2H), 4.38 (dd, *J* = 6.3, 8.9 Hz, 1H), 4.05 (dd, *J* = 2.2, 8.9 Hz, 1H), 3.20 (dd, *J* = 7.9, 14.8 Hz, 1H), 2.94 (bs, 1H), 2.48 (m, 2H), 2.35 (dd, *J* = 4.8, 16.6 Hz, 1H), 2.23 (dd, *J* = 10.1, 16.5 Hz, 1H); <sup>13</sup>C NMR (100 MHz, [D<sub>6</sub>]-DMSO): δ = 177.5, 172.9, 172.5, 71.0, 38.7, 34.2, 32.5, 30.2; IR (film)  $\tilde{\nu}$  = 2922 (br), 2578 (br), 1752, 1692, 1416, 1385, 1328, 1296, 1222, 1171, 986, 925; MS (EI): *m/z*: 203 (0.34), 184 (10), 166 (6), 156 (24), 143 (49), 125 (41), 112 (100), 97 (47), 85 (36), 70 (40), 67 (42), 55 (64); HRMS (ESI): *m/z*: calc. for C<sub>8</sub>H<sub>10</sub>O<sub>6</sub>Na: 225.0370 [M+Na]<sup>+</sup>, found: 225.0370.

**(3a*S*,6a*R*)-Tetrahydro-1*H*-cyclopenta[*c*]furan-1,5(3*H*)-dione (7).**<sup>[7]</sup> Diacid **6** (998 mg, 4.94 mmol) was

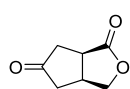

suspended in Ac<sub>2</sub>O (10 mL, 10.8 g, 106 mmol) and the mixture stirred at 130 °C (bath temperature) for 1 h. After cooling to room temperature, the mixture was diluted with THF (15 mL) before K<sub>2</sub>CO<sub>3</sub> (667 mg, 4.83 mmol) was added. The resulting mixture was stirred at 60 °C (bath temperature) overnight. After cooling to 0 °C, the reaction was quenched with MeOH (10 mL) and the mixture stirred for 30 min at 0 °C. Sat. aq. NH<sub>4</sub>Cl (20 mL) and CH<sub>2</sub>Cl<sub>2</sub> (20 mL) were added and stirring continued for 20 min at 0 °C. Phase separation followed by extraction of the aqueous layer with CH<sub>2</sub>Cl<sub>2</sub> (3 x 25 mL) gave a combined organic phase, which was dried over Na<sub>2</sub>SO<sub>4</sub>, filtered and concentrated. The crude product was purified by flash chromatography (SiO<sub>2</sub>, hexane/EtOAc, 1/1) to give the title compound as a pale yellow solid (504 mg, 73%).

The reaction was also performed on larger scale, using Ac<sub>2</sub>O (124 mL, 134 g, 1.31 mol), diacid **6** (10.0 g, 49.5 mmol), K<sub>2</sub>CO<sub>3</sub> (6.84 g, 49.5 mmol) and THF (370 mL) to give analytically pure **7** (3.86 g, 56%) which analyzed as follows: m.p. = 81-82 °C (EtOAc, lit.:<sup>[4a]</sup> 84 °C for *ent*-**6**);  $[\alpha]_D^{20}$  = +80.6 [c = 1.1, CH<sub>2</sub>Cl<sub>2</sub>, lit.:<sup>[4a]</sup> –67.8 (c = 2.59, CH<sub>2</sub>Cl<sub>2</sub>, for *ent*-**6**); <sup>1</sup>H NMR (400 MHz, CDCl<sub>3</sub>): δ = 4.53 (dd, *J* = 5.9, 9.6 Hz, 1H), 4.25 (d, *J* = 11.5, 1H), 3.40-3.11 (m, 2H), 2.79-2.51 (m, 3H), 2.21 (dd, *J* = 8.3, 19.1 Hz, 1H); <sup>13</sup>C NMR (100 MHz, CDCl<sub>3</sub>): δ = 214.0, 178.1, 71.8, 42.2, 40.8, 39.3, 36.3; IR (film)  $\tilde{\nu}$  = 2975, 2920, 1765, 1732, 1403, 1371, 1308, 1185, 1173, 1097, 1033, 975; MS (EI): *m/z*: 140 (72), 122 (4), 112 (15), 99 (64), 95 (23), 81 (35), 67 (73), 54 (100); HRMS (ESI): *m/z*: calc. for C<sub>7</sub>H<sub>8</sub>O<sub>3</sub>: 140.0473 [M]<sup>+</sup>, found: 140.0474.

**(3a*S*,5*R*,6a*R*)-5-Hydroxyhexahydro-1*H*-cyclopenta[*c*]furan-1-one (8).**<sup>[4a]</sup> NaOAc (7.04 g, 85.8 mmol)

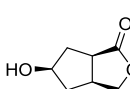

and Pt/C (10 wt-%, 781 mg, 1.4 mol-%) were added to a solution of keto-lactone **7** (4.01 g, 28.6 mmol) in EtOAc (120 mL) and the mixture was stirred under an atmosphere of hydrogen (1 atm) for 1.5 d. The suspension was filtered through a pad of silica which was carefully rinsed with EtOAc (2 x 20 mL). The combined filtrates were evaporated under reduced pressure to give the title compound as pale yellow solid (4.04 g, 99%): m.p. = 64-65 °C (EtOAc, lit.:<sup>[8]</sup> 69-70 °C);  $[\alpha]_D^{20}$  = –71.0 [c = 2.0, CH<sub>2</sub>Cl<sub>2</sub>, lit.:<sup>[8]</sup> –59.5 (c = 1.73, CH<sub>2</sub>Cl<sub>2</sub>)]; <sup>1</sup>H NMR (400 MHz, CDCl<sub>3</sub>): δ = 4.53 (t, *J* = 8.7, 1H), 4.44 (t, *J* = 3.8, 1H), 4.21 (dd, *J* = 3.1, 9.2 Hz, 1H), 3.16-2.89 (m, 2H), 2.28-2.23 (m, 1H), 2.07-1.90 (m, 2H), 1.88-1.76 (m, 2H); <sup>13</sup>C NMR (100 MHz, CDCl<sub>3</sub>): δ = 181.5, 74.7, 73.6, 43.3, 42.3, 40.4, 36.9; IR (film)  $\tilde{\nu}$  = 3451br, 2939, 1744, 1383, 1265, 1192, 1140, 1105, 1008, 977, 734, 701; MS (EI): *m/z*: 142 (43), 124 (47), 113 (32), 96 (20), 83 (55), 69 (62), 55 (100); HRMS (ESI): *m/z*: calc. for



C<sub>7</sub>H<sub>10</sub>O<sub>3</sub>: 142.0630 [M]<sup>+</sup>, found: 142.0628. Single crystals suitable for X-ray diffraction were obtained from a solution in EtOAc upon slow evaporation of the solvent.

**(3a*S*,5*R*,6a*R*)-5-[(*tert*-Butyldimethylsilyl)oxy]hexahydro-1*H*-cyclopenta[*c*]furan-1-one (9).** TBSOTf

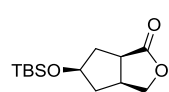

(9.78 mL, 11.3 g, 42.6 mmol) was added dropwise at 0 °C to a solution of 2,6-lutidine (6.6 mL, 6.09 g, 56.8 mmol) and hydroxylactone **6** (4.04 g, 28.4 mmol) in CH<sub>2</sub>Cl<sub>2</sub> (38 mL). After stirring for 1 h at 0 °C, the reaction was quenched by the addition of sat. aq. NaHCO<sub>3</sub> (ca. 10 mL) and the aqueous layer was extracted with EtOAc (3 x 50 mL). The combined organic phases were washed with aq. CuSO<sub>4</sub> (1 M, 5 x 15 mL) and brine (10 mL), before they were dried over Na<sub>2</sub>SO<sub>4</sub>, filtered and concentrated. The residue was dried under high vacuum to give pure **9** as pale yellow solid (7.12 g, 98%). m.p. = 48-49 °C (EtOAc);  $[\alpha]_D^{20} = -20.3$  (c = 1.6, CH<sub>2</sub>Cl<sub>2</sub>); <sup>1</sup>H NMR (400 MHz, CDCl<sub>3</sub>): δ = 4.51 (t, *J* = 8.7, 1H), 4.34-4.32 (m, 1H), 4.17-4.14 (m, 1H), 3.04-2.99 (m, 2H), 2.20 (d, *J* = 13.5 Hz, 1H), 1.94-1.85 (m, 2H), 1.75 (d, *J* = 13.6 Hz, 1H), 0.85 (s, 9H), 0.04 (s, 6H); <sup>13</sup>C NMR (100 MHz, CDCl<sub>3</sub>): δ = 181.1, 74.9, 74.2, 43.7, 43.5, 40.7, 37.2, 26.0, 18.2, -4.62, -4.65; IR (film)  $\tilde{\nu}$  = 2958, 2928, 2856, 1751, 1377, 1255, 1195, 1045, 1023, 908, 833, 773; MS (EI): *m/z*: 241 (3), 199 (93), 169 (12), 141 (14), 125 (4), 105 (7), 89 (6), 75 (100), 59 (7); HRMS (ESI): *m/z*: calc. for C<sub>13</sub>H<sub>24</sub>O<sub>3</sub>SiNa: 279.1387 [M+Na]<sup>+</sup>, found: 279.1383.

**{(1*S*,2*R*,4*S*)-4-[(*tert*-Butyldimethylsilyl)oxy]-2-(prop-1-yn-1-yl)cyclopentyl}methanol (11).** A flame

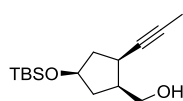

dried 2-neck round bottom flask, equipped with a reflux condenser and a dropping funnel, was charged with PPh<sub>3</sub> (43.4 g, 165 mmol). THF (450 mL) and the lactone **9** (5.31 g, 20.7 mmol) were added and the mixture was stirred at reflux temperature (oil-bath temperature ≈ 80 °C). A solution of CCl<sub>4</sub> (50 mL, 79.5 g, 516 mmol) in THF (50 mL) was added dropwise over a period of 3.5 h. Once the addition was complete, stirring was continued at this temperature for 3 h, before the mixture was cooled and the reaction quenched with water (10 mL). The mixture was extracted with *tert*-butyl methyl ether (3 x 200 mL), the combined organic phases were washed with sat. aq. NaHCO<sub>3</sub> (100 mL) and brine (50 mL), before they were dried over Na<sub>2</sub>SO<sub>4</sub>, filtered and concentrated under reduced pressure. The crude product was purified by flash chromatography (SiO<sub>2</sub>, hexane/EtOAc, 50/1) to give the dichloro-olefin **10** (containing minor PPh<sub>3</sub> impurities) which was immediately used for the subsequent reaction. Characteristic data of **10**: <sup>1</sup>H NMR (400 MHz, CDCl<sub>3</sub>): δ = 4.45 (t, *J* = 8.6, 1H), 4.32-4.26 (m, 2H), 3.39 (dt, *J* = 4.6, 9.3 Hz, 1H), 3.21 (s, 1H), 3.02-2.92 (m, 1H), 2.06-2.02 (m, 2H), 1.94-1.88 (m, 1H), 1.72-1.66 (m, 1H), 0.87 (s, 9H), 0.04 (s, 6H); <sup>13</sup>C NMR (100 MHz, CDCl<sub>3</sub>): δ = 159.5, 79.5, 77.4, 74.5, 46.0, 41.4, 41.4, 40.6, 25.8, 18.0, -4.7, -4.9.

A flame-dried Schlenk tube was charged with Fe(acac)<sub>3</sub> (896 mg, 2.54 mmol), *ortho*-phenylenediamine (548 mg, 5.07 mmol), Et<sub>2</sub>O (120 mL) and the crude dichloro-olefin **10** from the previous reaction. The solution was cooled to 0 °C before MeLi (1.6 M in Et<sub>2</sub>O, 39.6 mL, 63.4 mmol) was slowly added. The mixture was stirred for 10 min at 0 °C and for 2 h at room temperature. For work up, the mixture was cooled to 0 °C before the reaction was carefully quenched with water (20 mL). The aqueous phase was extracted with *tert*-butyl methyl ether (3 x 100 mL) and the combined organic

layers were dried over Na<sub>2</sub>SO<sub>4</sub>, filtered and concentrated under reduced pressure. The crude product was purified by flash chromatography (SiO<sub>2</sub>, hexane/EtOAc, 15/1) to give alkyne **11** as an oil (3.02 g, 55%).  $[\alpha]_D^{20} = -2.6$  (c = 2.0, CH<sub>2</sub>Cl<sub>2</sub>); <sup>1</sup>H NMR (400 MHz, CDCl<sub>3</sub>): δ = 4.14 (quint, *J* = 6.5, 1H), 3.82 (dd, *J* = 7.6, 11.4 Hz, 1H), 3.69-3.64 (m, 1H), 2.80-2.73 (m, 1H), 2.62 (bs, 1H), 2.25-2.16 (m, 2H), 1.98-1.91 (m, 1H), 1.81 (d, *J* = 2.5 Hz, 3H), 1.73-1.66 (m, 1H), 1.42 (dt, *J* = 13.1, 6.5 Hz, 1H), 0.87 (s, 9H), 0.04 (s, 6H); <sup>13</sup>C NMR (100 MHz, CDCl<sub>3</sub>): δ = 80.2, 78.5, 72.7, 65.1, 42.8, 42.7, 38.4, 30.2, 26.0, 18.2, 3.7, -4.6, -4.7; IR (film)  $\tilde{\nu}$  = 3414br, 2954, 2929, 2885, 2857, 1472, 1463, 1361, 1256, 1099, 1034, 896, 835, 775, 738; MS (EI): *m/z*: 268 (0.2), 253 (1), 211 (50), 193 (6), 181 (14), 169 (17), 155 (10), 141 (18), 119 (37), 105 (8), 91 (28), 75 (100); HRMS (ESI): *m/z*: calc. for C<sub>15</sub>H<sub>28</sub>O<sub>2</sub>SiNa: 291.1751 [M+Na]<sup>+</sup>, found: 291.1749.

**Compound 12.** Lactone **9** (8.85 g, 20.7 mmol) was added to a solution of PPh<sub>3</sub> (71.5 g, 273 mmol) in THF (800 mL) and the resulting mixture was stirred at reflux temperature (oil bath temperature ca. 80 °C) when a solution of CCl<sub>4</sub> (83 mL, 132 g, 860 mmol) in THF (50 mL) was added dropwise over a period of 3.5 h. Once the addition was complete, stirring was continued at this temperature for an additional 3 h, before the mixture was allowed to cool and the reaction was quenched with water (10 mL). The mixture was extracted with *tert*-butyl methyl ether (3 x 200 mL), the combined organic phases were washed with sat. aq. NaHCO<sub>3</sub> (100 mL) and brine (50 mL), before they were dried over Na<sub>2</sub>SO<sub>4</sub>, filtered and concentrated under reduced pressure (*Note*: GC-MS shows that the desired dichloro-olefin **10** was the major component at this point). The crude product was suspended in CH<sub>2</sub>Cl<sub>2</sub> (ca. 40 mL) and the solution was ultrasonicated in a laboratory cleaning bath for 1 min. The obtained slurry was purified by flash chromatography (SiO<sub>2</sub>, hexane/EtOAc, 20/1 to 4/1) to give product **12** as a white solid (4.59 g, 64%). m.p. = 51-54 °C (hexane/EtOAc 4/1);  $[\alpha]_D^{20} = +38.2$  (c = 0.8, CHCl<sub>3</sub>); <sup>1</sup>H NMR (400 MHz, CDCl<sub>3</sub>): δ = 5.67 (s, 1H), 4.46 (d, *J* = 0.5, 1H), 4.01 (dd, *J* = 8.2, 3.7 Hz, 1H), 3.91 (d, *J* = 8.2, 1H), 2.97-2.96 (m, 1H), 2.70-2.65 (m, 1H), 2.09-2.00 (m, 2H), 1.72-1.68 (m, 2H); <sup>13</sup>C NMR (100 MHz, CDCl<sub>3</sub>): δ = 112.5, 76.6, 74.0, 71.8, 48.5, 39.5, 38.4, 37.8; IR (film)  $\tilde{\nu}$  = 2999, 2973, 2957, 2883, 1437, 1310, 1214, 1140, 1056, 998, 920, 760, 730; MS (EI): *m/z*: 208 (4), 172 (16), 164 (16), 137 (100), 125 (22), 107 (25), 97 (24), 80 (100), 67 (94); HRMS (ESI): *m/z*: calc. for C<sub>8</sub>H<sub>10</sub>O<sub>2</sub>Cl<sub>2</sub>Na: 230.9950 [M+Na]<sup>+</sup>, found: 230.9951. Crystals suitable for X-ray diffraction were obtained by sublimation of a sample at 40°C in vacuum (10<sup>-3</sup> mbar).

**(1S,2R,4S)-4-[(*tert*-Butyldimethylsilyl)oxy]-2-(prop-1-yn-1-yl)cyclopentane-1-carbaldehyde (S1).**

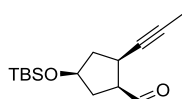

Pyridine (5.80 mL, 71.7 mmol) and Dess-Martin-periodinane (5.63 g, 13.3 mmol) were successively added to a solution of alcohol **11** (2.38 g, 8.8 mmol) in CH<sub>2</sub>Cl<sub>2</sub> (46 mL). The mixture was stirred for 3 h at room temperature before the reaction was quenched with sat. aq. NaHCO<sub>3</sub> (ca. 10 mL). The mixture was extracted with *tert*-butyl methyl ether (3 x 30 mL), the combined organic layers were washed with aq. CuSO<sub>4</sub> (1 M, 4 x 10 mL) and brine (2 x 5 mL) before they were dried over Na<sub>2</sub>SO<sub>4</sub>. Evaporation of the solvent followed by purification of the crude product by flash chromatography (SiO<sub>2</sub>, hexane/EtOAc, 40/1) yielded the title compound in the form of a colorless oil (2.09 g, 89%).  $[\alpha]_D^{20} = +31.4$  (c = 1.0, CH<sub>2</sub>Cl<sub>2</sub>); <sup>1</sup>H NMR (400 MHz, CDCl<sub>3</sub>): δ =

9.92 (d,  $J = 3.2$  Hz, 1H), 4.24 (quint,  $J = 5.9$  Hz, 1H), 3.00 (tdd,  $J = 11.0, 5.5, 2.5$  Hz, 1H), 2.72-2.65 (m, 1H), 2.4 (ddd,  $J = 13.8, 8.3, 6.0$  Hz, 1H), 1.99-1.96 (m, 2H), 1.79-1.72 (m, 1H), 1.78 (d,  $J = 2.5$  Hz, 3H), 0.87 (s, 9H), 0.05 (s, 3H), 0.04 (s, 3H);  $^{13}\text{C}$  NMR (100 MHz,  $\text{CDCl}_3$ ):  $\delta = 204.1, 79.9, 78.3, 72.9, 51.5, 43.2, 36.8, 29.5, 25.9, 18.1, 3.7, -4.65, -4.68$ ; IR (film)  $\tilde{\nu} = 2930, 2857, 1723, 1472, 1361, 1255, 1115, 896, 775$ ; MS (EI):  $m/z$ : 266 (0.12), 251 (0.89), 209 (72), 179 (3), 165 (4), 143 (100), 129 (7), 117 (4), 91 (4), 75 (77); HRMS (ESI):  $m/z$ : calc. for  $\text{C}_{15}\text{H}_{26}\text{O}_2\text{SiNa}$ : 289.1594  $[\text{M}+\text{Na}]^+$ , found: 289.1596.

**(1R,2R,4S)-4-[(*tert*-Butyldimethylsilyl)oxy]-2-(prop-1-yn-1-yl)cyclopentane-1-carbaldehyde (13).**

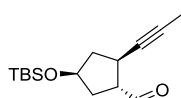

$\text{K}_2\text{CO}_3$  (2.17 g, 15.7 mmol) was added in one portion to a solution of aldehyde **S1** (2.09 g, 7.84 mmol) in MeOH (200 mL) and the resulting mixture was stirred for 3 h at room temperature. EtOAc (ca. 70 mL) was added, followed by aq. sat.  $\text{NH}_4\text{Cl}$ . The aqueous phase was extracted with EtOAc (2 x 70 mL) and the combined organic layers were washed with brine (5 mL), dried over  $\text{Na}_2\text{SO}_4$ , filtered and concentrated under reduced pressure. The remaining crude material was purified by flash chromatography ( $\text{SiO}_2$ , hexane/toluene, 2/1) to give the title compound as colorless oil (1.84 g, 88%).  $[\alpha]_D^{20} = -22.4$  ( $c = 1.0, \text{CH}_2\text{Cl}_2$ );  $^1\text{H}$  NMR (400 MHz,  $\text{CDCl}_3$ ):  $\delta = 9.73$  (d,  $J = 1.8$ , 1H), 4.19 (quint.,  $J = 5.7$  Hz, 1H), 3.07 (qd,  $J = 9.0, 1.8$  Hz, 1H), 2.79 (dddd,  $J = 11.3, 9.0, 6.7, 2.4$  Hz, 1H), 2.28 (ddd,  $J = 13.6, 8.3, 5.8$  Hz, 1H), 1.93 (ddd,  $J = 13.5, 8.6, 6.4$  Hz, 1H), 1.83 (ddd,  $J = 13.3, 9.2, 4.2$  Hz, 1H), 1.78 (d,  $J = 2.4$  Hz, 3H), 1.76-1.69 (m, 1H), 0.88 (s, 9H), 0.04 (s, 3H), 0.04 (s, 3H);  $^{13}\text{C}$  NMR (100 MHz,  $\text{CDCl}_3$ ):  $\delta = 202.3, 80.6, 77.4, 72.2, 57.1, 43.5, 35.9, 29.1, 25.9, 18.2, 3.7, -4.64, -4.66$ ; IR (film)  $\tilde{\nu} = 3097, 2929, 2857, 1725, 1331, 1302, 1253, 1112, 835, 773$ ; MS (EI):  $m/z$ : 209 (100), 195 (3), 179 (3), 169 (8), 151 (3), 143 (14), 117 (10), 105 (20), 97 (8), 91 (4), 75 (77); HRMS (ESI):  $m/z$ : calc. for  $\text{C}_{15}\text{H}_{26}\text{O}_2\text{SiNa}$ : 289.1594  $[\text{M}+\text{Na}]^+$ , found: 289.1594.

**1-Bromo-3-pentyne (14).**<sup>[13]</sup>  $\text{Br}_2$  (6.65 g, 41.6 mmol) was added dropwise at 0 °C to a solution of  $\text{PPh}_3$

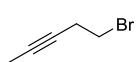

(11.7 g, 44.6 mmol) in MeCN (62 mL) and  $\text{Et}_2\text{O}$  (114 mL) and the resulting mixture was stirred for 20 min at this temperature. Imidazole (3.0 g, 44.66 mmol) was then added in portions before 3-pentyn-1-ol (2.5 g, 29.7 mmol) was slowly introduced. The slurry was stirred for 30 min at 0 °C and for 2 h at ambient temperature. The reaction was quenched with sat. aq.  $\text{NaHCO}_3$  and the aqueous phase extracted with pentane (2 x 100 mL). The combined extracts were dried over  $\text{Na}_2\text{SO}_4$ , filtered and concentrated (450-350 mbar, 30 °C bath temperature). The obtained solution was filtered twice through a large pad of silica, eluting with pentane. Concentration of the pentane fractions (350 mbar, 30 °C bath temperature) gave the title compound as clear oil (4.35 g, quant.).  $^1\text{H}$  NMR (400 MHz,  $\text{CDCl}_3$ ):  $\delta = 3.41$  (t,  $J = 7.4$ , 2H), 2.69 (tq,  $J = 2.5, 7.3$  Hz, 2H), 1.79 (t,  $J = 2.5$  Hz, 3H);  $^{13}\text{C}$  NMR (100 MHz,  $\text{CDCl}_3$ ):  $\delta = 78.1, 76.2, 30.5, 23.5, 3.6$ ; IR (film)  $\tilde{\nu} = 2969, 2919, 2855, 1436, 1336, 1271, 1212, 919, 871, 745, 698, 637, 566, 503$ ; MS (EI):  $m/z$ : 148 (42), 146 (43), 93 (2), 67 (100), 53, (16), 41 (41); HRMS (EI):  $m/z$ : calc. for  $\text{C}_5\text{H}_7\text{Br}$ : 145.9732  $[\text{M}]$ , found: 145.9731.

**(R)-6-Octyn-2-ol (S2).**<sup>[14]</sup> Bromide **14** (3.59, 24.4 mmol) was added dropwise to a suspension of

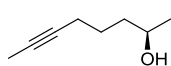

activated magnesium<sup>[15]</sup> (832 mg, 34.2 mmol) at 0 °C. The mixture was stirred for 30 min at 0 °C and for 40 min at room temperature. After cooling to -78 °C (15 min cooling time),  $\text{CuCN}$  (219 mg, 2.44 mmol) followed by (*R*)-propylene oxide (1.14 mL, 947 mg, 16.3

mmol) was introduced. The resulting mixture was stirred for 30 min at  $-78\text{ }^{\circ}\text{C}$  before the cooling bath was removed and stirring was continued for 16 h. For work up, the reaction was quenched at  $0\text{ }^{\circ}\text{C}$  by the careful addition of sat. aq.  $\text{NH}_4\text{Cl}$  (ca. 30 mL), the obtained slurry was filtered through a pad of Celite to remove the remaining magnesium powder and the filtrate was extracted with *tert*-butyl methyl ether (4 x 50 mL). The combined organic phases were dried over  $\text{Na}_2\text{SO}_4$ , filtered and concentrated, and the residue was subjected to flash chromatography ( $\text{SiO}_2$ , hexane/*tert*-butyl methyl ether, 4/1) to yield the title compound as a pale yellow oil (1.8 g, 88%).  $[\alpha]_D^{20} = -10.6$  ( $c = 1.2$ ,  $\text{CHCl}_3$ );  $^1\text{H NMR}$  (400 MHz,  $\text{CDCl}_3$ ):  $\delta = 3.83\text{--}3.80$  (m, 1H), 2.19–2.13 (m, 2H), 1.78 (t,  $J = 2.5$  Hz, 3H), 1.63–1.48 (m, 4H), 1.36 [s(br), 1H], 1.20 (d,  $J = 6.2$  Hz, 3H);  $^{13}\text{C NMR}$  (100 MHz,  $\text{CDCl}_3$ ):  $\delta = 79.1$ , 76.0, 67.9, 38.6, 25.4, 23.7, 18.9, 3.6; IR (film)  $\tilde{\nu} = 3351\text{br}$ , 2965, 2920, 2863, 1455, 1435, 1373, 1331, 1182, 1127, 1084, 1045, 1004, 990, 943, 862, 733; MS (EI):  $m/z$ : 111 (23), 93 (84), 91 (20), 84 (71), 79 (24), 77 (26), 71 (41), 66 (100), 54 (41), 45 (78); HRMS (EI):  $m/z$ : calc. for  $\text{C}_8\text{H}_{14}\text{O}$ : 126.1046 [M], found: 126.1045.

**(S)-Oct-6-yn-2-yl propiolate (16).** Propiolic acid (1.19 g, 16.6 mmol) was dissolved in THF (15 mL) and

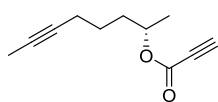

the solution cooled to  $0\text{ }^{\circ}\text{C}$  before diisopropyl azodicarboxylate (2.42 mL, 2.46 g, 12.2 mmol) was added. Next, a solution of alcohol **S2** (1.40 g, 11.1 mmol) and  $\text{PPh}_3$  (3.79 g, 14.4 mmol) in THF (15 mL) was introduced over the course of 1 h.

The resulting mixture was allowed to warm to room temperature and stirring was continued for 16 h. *tert*-Butyl methyl ether (100 mL) was added and the obtained red solution was washed with  $\text{H}_2\text{O}_2$  (10 wt-% in water, 3 x 30 mL) and sat. aq.  $\text{NaHCO}_3$  (50 mL). The organic phase was dried over  $\text{Na}_2\text{SO}_4$ , filtered and concentrated to ca. 10 mL (250 mbar). This residue was subjected to flash chromatography ( $\text{SiO}_2$ , hexane/*tert*-butyl methyl ether, 30/1) to give the title compound as pale yellow oil (1.30 g, 66%).  $[\alpha]_D^{20} = +28.8$  ( $c = 1.2$ ,  $\text{CHCl}_3$ );  $^1\text{H NMR}$  (400 MHz,  $\text{CDCl}_3$ ):  $\delta = 5.04$  (dq,  $J = 7.5, 6.2, 5.1$  Hz, 1H), 2.85 (s, 1H), 2.15 (tq,  $J_1 = 7.0, 2.6$  Hz, 2H), 1.77 (t,  $J = 2.6$  Hz, 3H), 1.75–1.47 (m, 4H), 1.29 (d,  $J = 6.2$  Hz, 3H);  $^{13}\text{C NMR}$  (100 MHz,  $\text{CDCl}_3$ ):  $\delta = 152.5, 78.6, 76.3, 75.2, 74.3, 73.6, 35.0, 24.9, 19.9, 18.7, 3.6$ ; IR (film)  $\tilde{\nu} = 3264, 2981, 2939, 2865, 2115, 1453, 1381, 1231, 1130, 1080, 755$ ; MS (EI):  $m/z$ : 163 (0.4), 135 (3), 121 (5), 108 (12), 93 (95), 79 (25), 66 (100), 53 (86); HRMS (ESI):  $m/z$ : calc. for  $\text{C}_{11}\text{H}_{14}\text{O}_2\text{Na}$ : 201.0887 [M+Na] $^+$ , found: 201.0886.

**Preparation of (R)-bis(3,5-di-*tert*-Butylphenyl)(1-methylpyrrolidin-2-yl)methanol (25).** *This ligand was prepared in analogy to a literature protocol.*<sup>[9][16]</sup> Magnesium turnings (682 mg,

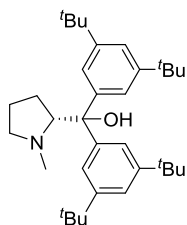

28.1 mmol) were combined with iodine (ca. 4 mg) in a 2-neck round bottom flask, equipped with a reflux condenser. The iodine was sublimed *via* a heatgun and THF (6 mL) was introduced after the iodine vapor had settled, followed by the dropwise addition of a solution of the 3,5-bis-*tert*-butylphenylbromide in THF (10 mL). The reaction was initiated *via* gentle heating after addition of ca. 1/3 of the bromide.

Once the addition was complete, the mixture was stirred at  $80\text{ }^{\circ}\text{C}$  for 2 h. The resulting solution was slowly added to a solution of benzyl 2-methyl (*R*-pyrrolidine)-1,2-dicarboxylate (*N*-Cbz *D*-proline methyl ester, 1.79 g, 6.80 mmol) in THF (7.4 mL) at  $0\text{ }^{\circ}\text{C}$ . The mixture was warmed to room

temperature and stirred for 2 h. The reaction was carefully quenched with sat. aq.  $\text{NH}_4\text{Cl}$  (10 mL) and extracted with *tert*-butyl methyl ether (3 x 100 mL). The combined organic phases were washed with sat. aq.  $\text{NaHCO}_3$  (30 mL) and brine (30 mL) before they were dried over  $\text{Na}_2\text{SO}_4$ , filtered and concentrated. The residue was purified by flash chromatography ( $\text{SiO}_2$ , hexane/EtOAc, 9/1) to give a mixture of the target compound **25** and di-*tert*-butylbenzene.

This mixture was dissolved in THF (90 mL) and cooled to 0 °C before  $\text{LiAlH}_4$  (684 mg, 18.0 mmol) was added portionwise over a period of 5 min. The cooling bath was removed and the mixture stirred at 90 °C for 30 min. The reaction was carefully quenched at 0 °C with sat. aq.  $\text{NH}_4\text{Cl}$  (ca. 10 mL). A saturated aqueous solution of Rochelle's salt (5 mL) was added and the mixture was stirred for 45 min. Insoluble material was filtered off through a pad of Celite, the filtrate was checked for a pH > 8 and extracted with *tert*-butyl methyl ether (3 x 100 mL). The combined organic phases were dried over  $\text{Na}_2\text{SO}_4$ , filtered and concentrated to give a colorless oil containing small amounts of a white solid. This material was dissolved in hexane and kept at 4 °C to allow for crystallization (scratching of the flask with a glass rod was necessary). After 16 h, compound **25** was collected as a white amorphous solid (2.58 g, 77%); after concentration of the mother liquor and repeated crystallization, a second crop of product was obtained (380 mg, 11%). m.p. = 138-142 °C (hexane);  $[\alpha]_D^{20} = -13.7$  (c = 1.0,  $\text{CHCl}_3$ );  $^1\text{H}$  NMR (400 MHz,  $\text{CDCl}_3$ ):  $\delta = 7.55$  (d,  $J = 1.8$  Hz, 2H), 7.41 (d,  $J = 1.8$  Hz, 2H), 7.16 (d,  $J = 2.8, 1.8$  Hz, 2H), 4.65 (s, 1H), 3.58 (dd,  $J = 9.5, 4.9$  Hz, 1H), 3.08 (dd,  $J = 9.5, 7.4$  Hz, 1H), 2.45-2.39 (m, 1H), 1.82-1.77 (m, 1H), 1.73 (s, 3H), 1.71-1.57 (m, 3H), 1.30 (s, 18H), 1.29 (s, 18H);  $^{13}\text{C}$  NMR (100 MHz,  $\text{CDCl}_3$ ):  $\delta = 149.9, 149.8, 147.7, 146.2, 120.1, 119.8, 119.7, 119.5, 77.9, 73.2, 59.5, 43.0, 35.1, 35.0, 31.74, 31.72, 30.0, 24.0$ ; IR (film)  $\tilde{\nu} = 2962, 2904, 2868, 2787, 1598, 1362, 1214, 742, 668$ ; MS (EI):  $m/z$ : 476 (0.3), 407 (0.7), 392 (2), 302 (0.6), 217 (4), 161 (2), 133 (1), 84 (100), 57 (5); HRMS (ESI):  $m/z$ : calc. for  $\text{C}_{34}\text{H}_{54}\text{NO}$ : 492.4200  $[\text{M}+\text{H}]^+$ , found: 492.4200.

**(S)-Oct-6-yn-2-yl (S)-4-((1R,2R,4S)-4-((*tert*-butyldimethylsilyl)oxy)-2-(prop-1-yn-1-yl)cyclopentyl)-4-hydroxybut-2-ynoate (17).**<sup>[9]</sup> Compound **25** (101 mg, 0.21 mmol, 27.5 mol-%)

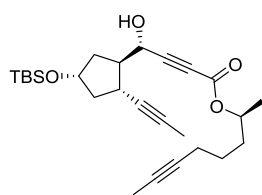

was dissolved in dry toluene (600  $\mu\text{L}$ ). Ester **16** (207 mg, 1.16 mmol) was added, followed by careful addition of  $\text{Me}_2\text{Zn}$  (1.2 M in toluene, 940  $\mu\text{L}$ , 1.13 mmol) and a solution of aldehyde **13** (200 mg, 0.75 mmol) in toluene (840  $\mu\text{L}$ ). The mixture was stirred for 16 h at ambient temperature before the

reaction was carefully quenched with sat. aq.  $\text{NH}_4\text{Cl}$ . The mixture was extracted with EtOAc (3 x 25 mL), the combined organic phases were dried over  $\text{Na}_2\text{SO}_4$ , filtered and concentrated under reduced pressure. The remaining yellow oil was purified by flash chromatography ( $\text{SiO}_2$ , toluene/EtOAc, 50/1) to give the title compound as colorless oil (247 mg, 74%).

The reaction was also performed on larger scale, using aldehyde **13** (1.67 g, 6.28 mmol), ester **16** (1.73 g, 9.73 mmol), dimethylzinc (1.2 M in toluene, 7.85 mL, 9.42 mmol), **25** (772 mg, 1.57 mmol, 25 mol-%) and toluene (12 mL) to give the title compound (1.84 g, 66%), which analyzed as follows:  $[\alpha]_D^{20} = -12.3$  (c = 1.0,  $\text{CH}_2\text{Cl}_2$ );  $^1\text{H}$  NMR (400 MHz,  $\text{CDCl}_3$ ):  $\delta = 5.02$  (ddq,  $J = 7.6, 6.2, 5.1$  Hz, 1H), 4.68 (dd,  $J = 7.0, 3.3$  Hz, 1H), 4.23 (p,  $J = 5.8$  Hz, 1H), 2.63-2.46 (m, 2H), 2.39 (d,  $J = 7.0$  Hz, 1H), 2.31 (ddd,  $J$

= 13.4, 7.5, 6.1 Hz, 1H), 2.17-2.12 (m, 2H), 1.78-1.77 (m, 6H), 1.75-1.40 (m, 7H), 1.28 (d,  $J = 6.2$  Hz, 3H), 0.88 (s, 9H), 0.04 (s, 6H);  $^{13}\text{C}$  NMR (100 MHz,  $\text{CDCl}_3$ ):  $\delta = 153.1, 86.3, 81.1, 78.6, 77.7, 77.4, 76.2, 73.3, 71.8, 63.6, 49.8, 43.8, 36.6, 35.0, 30.0, 26.0, 24.9, 20.0, 18.7, 18.2, 3.7, 3.6, -4.61, -4.63$ ; IR (film)  $\tilde{\nu} = 3461\text{br}, 2929, 2856, 2233, 1709, 1462, 1378, 1360, 1252, 1112, 1051, 836, 775$ ; MS (EI):  $m/z$ : 401 (5), 387 (30), 279 (39), 209 (12), 187 (14), 169 (11), 161 (11), 159 (13), 141 (12), 131 (17), 115 (11), 109 (93), 105 (19), 91 (20), 75 (100), 67 (42); HRMS (ESI):  $m/z$ : calc. for  $\text{C}_{26}\text{H}_{40}\text{O}_4\text{SiNa}$ : 467.2597  $[\text{M}+\text{Na}]^+$ , found: 467.2588.

**(S)-Oct-6-yn-2-yl (R,E)-4-[(1R,2R,4S)-4-[(tert-butyldimethylsilyl)oxy]-2-(prop-1-yn-1-yl)cyclopentyl]-4-hydroxybut-2-enoate (S3).**<sup>[10]</sup> Red-Al (65 wt-% in toluene, 3.03 mL,

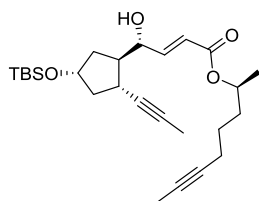

10.1 mmol) was added dropwise at  $-78$  °C to a solution of compound **17** (2.25 g, 5.05 mmol) in THF (76 mL) and the resulting mixture was stirred at this temperature for 20 min. Sat. aq.  $\text{NH}_4\text{Cl}$  was then used to quench the reaction. The resulting mixture was allowed to warm to room temperature

before it was extracted with EtOAc [4 x 50 mL, in order to facilitate extraction, saturated aq. Rochelle's salt solution (15 mL) was added]. The combined organic phases were dried over  $\text{Na}_2\text{SO}_4$ , filtered and concentrated under reduced pressure. The residue was purified by flash chromatography ( $\text{SiO}_2$ , hexane/EtOAc, 12/1) to give the title compound as pale yellow oil (2.10 g, 93%).  $[\alpha]_D^{20} = -9.5$  ( $c = 1.0, \text{CH}_2\text{Cl}_2$ );  $^1\text{H}$  NMR (400 MHz,  $\text{CDCl}_3$ ):  $\delta = 6.98$  (dd,  $J = 4.5, 15.6$  Hz, 1H), 6.06 (dd,  $J = 1.8, 15.6$  Hz, 1H), 4.99 (sext.,  $J = 6.3$  Hz, 1H), 4.52-4.48 (m, 1H), 4.21-4.15 (m, 1H), 2.51-2.43 (m, 1H), 2.38-2.24 (m, 2H), 2.14 (tq,  $J = 7.0, 2.5$  Hz, 2H), 1.79-1.77 (m, 6H), 1.73-1.46 (m, 7H), 1.26 (d,  $J = 6.2$  Hz, 3H), 0.87 (s, 9H), 0.03 (s, 3H), 0.02 (s, 3H);  $^{13}\text{C}$  NMR (100 MHz,  $\text{CDCl}_3$ ):  $\delta = 166.2, 149.1, 121.2, 81.3, 78.8, 76.9, 76.1, 72.0, 71.1, 70.9, 49.8, 43.7, 35.3, 35.2, 30.6, 26.0, 25.1, 20.2, 18.8, 18.2, 3.7, 3.6, -4.60, -4.61$ ; IR (film)  $\tilde{\nu} = 3472\text{br}, 2952, 2929, 2857, 1716, 1699, 1462, 1360, 1254, 1172, 1114, 1084, 1051, 903, 835, 774$ ; MS (EI):  $m/z$ : 403 (8), 389 (50), 347 (15), 281 (18), 189 (18), 169 (15), 129 (17), 109 (75), 75 (100), 67 (46); HRMS (ESI):  $m/z$ : calc. for  $\text{C}_{26}\text{H}_{42}\text{O}_4\text{SiNa}$ : 469.2745  $[\text{M}+\text{Na}]^+$ , found: 469.2745.

**(S)-Oct-6-yn-2-yl (R,E)-4-[(tert-butyldimethylsilyl)oxy]-4-[(1R,2R,4S)-4-[(tert-butyldimethylsilyl)oxy]-2-(prop-1-yn-1-yl)cyclopentyl]but-2-enoate (18).** Pyridine (614  $\mu\text{L}$ , 600 mg, 7.59 mmol) and TBSOTf

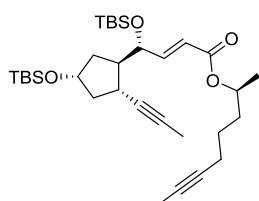

(871  $\mu\text{L}$ , 1.00 g, 3.79 mmol) were added at  $0$  °C to a solution of compound **S3** (1.13 g, 2.53 mmol) in  $\text{CH}_2\text{Cl}_2$ , and the resulting mixture was stirred at this temperature for 30 min. The reaction was quenched with sat. aq.  $\text{NaHCO}_3$  and the mixture extracted with EtOAc (3 x 20 mL). The combined organic phases were washed with aq.  $\text{CuSO}_4$  (1 M, 5 x 10 mL) and brine (10 mL), dried

over  $\text{Na}_2\text{SO}_4$ , filtered and concentrated under reduced pressure. The crude product was purified by flash chromatography (neutral  $\text{Al}_2\text{O}_3$ , hexane/EtOAc, 20/1) to give the title compound as colorless oil (1.32 g, 93%).  $[\alpha]_D^{20} = -16.4$  ( $c = 1.0, \text{CHCl}_3$ );  $^1\text{H}$  NMR (400 MHz,  $\text{CDCl}_3$ ):  $\delta = 6.89$  (dd,  $J = 4.8, 15.6$  Hz, 1H), 5.93 (dd,  $J = 1.7, 15.6$  Hz, 1H), 4.98 (dq,  $J = 12.4, 6.2$  Hz, 1H), 4.48-4.46 (m, 1H), 4.16-4.10 (m, 1H), 2.43-2.34 (m, 1H), 2.27-2.11 (m, 4H), 1.79-1.77 (m, 6H), 1.75-1.58 (m, 4H), 1.54-1.39 (m, 3H), 1.26 (d,  $J = 6.2$  Hz, 3H), 0.92 (s, 9H), 0.86 (s, 9H), 0.08 (s, 3H), 0.02 (s, 3H), 0.02 (s, 3H), 0.01 (s, 3H);  $^{13}\text{C}$

NMR (100 MHz, CDCl<sub>3</sub>):  $\delta$  = 166.3, 150.6, 120.6, 81.4, 78.8, 76.4, 76.0, 72.2, 70.74, 70.72, 50.5, 43.7, 35.3, 34.3, 30.7, 26.04, 26.02, 25.1, 20.2, 18.8, 18.31, 18.27, 3.7, 3.6, -4.1, -4.6, -5.0; IR (film)  $\tilde{\nu}$  = 2954, 2930, 2898, 2857, 1719, 1658, 1472, 1463, 1361, 1256, 1170, 1129, 712, 776; MS (EI):  $m/z$ : 503 (83), 395 (18), 371 (23), 295 (9), 263 (33), 245 (13), 197 (10), 171 (19), 109 (64), 75 (75), 73 (100), 67 (33); HRMS (ESI):  $m/z$ : calc. for C<sub>32</sub>H<sub>56</sub>O<sub>4</sub>Si<sub>2</sub>Na: 583.3611 [M+Na]<sup>+</sup>, found: 583.3609.

**Cycloalkyne 19.** A flame-dried round bottom flask, equipped with a reflux condenser, was charged

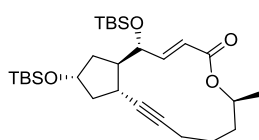

with molecular sieves [5Å, 3.75 g, powder (dried prior to use at 150 °C under high vacuum)]. A solution of diyne **18** (1.25 g, 2.23 mmol) in dry toluene (560 mL) was added and the slurry was stirred for 30 min before it was heated to 80 °C (oil bath temperature). The reaction was initiated by the addition of a

solution of complex **26** (123 mg, 118 μmol, 5 mol-%) in toluene (5 mL). After stirring for 45 min the mixture was diluted with EtOAc (60 mL) and filtered through a pad of neutral Al<sub>2</sub>O<sub>3</sub> which was rinsed with EtOAc (70 mL). The combined filtrates were concentrated under reduced pressure and the residue purified by flash chromatography (neutral Al<sub>2</sub>O<sub>3</sub>, hexane/EtOAc, 80/1) to give the title compound as colorless oil (752 mg, 67%).  $[\alpha]_D^{20}$  = -28.6 (c = 1.1, CHCl<sub>3</sub>); <sup>1</sup>H NMR (400 MHz, CDCl<sub>3</sub>):  $\delta$  = 7.59 (dd,  $J$  = 2.9, 15.4 Hz, 1H), 5.95 (dd,  $J$  = 1.9, 15.4 Hz, 1H), 5.02-4.93 (m, 1H), 4.21-4.14 (m, 1H), 3.96 (ddd,  $J$  = 1.9, 3.0, 9.4 Hz, 1H), 2.35-2.14 (m, 4H), 2.01-1.88 (m, 2H), 1.79-1.60 (m, 4H), 1.56-1.38 (m, 2H), 1.28 (d,  $J$  = 6.4 Hz, 3H), 0.93 (s, 9H), 0.87 (s, 9H), 0.05 (s, 3H), 0.03 (s, 9H); <sup>13</sup>C NMR (100 MHz, CDCl<sub>3</sub>):  $\delta$  = 166.6, 152.4, 118.5, 82.9, 81.9, 76.1, 71.8, 71.0, 53.9, 44.3, 41.9, 36.0, 31.5, 29.9, 26.0, 24.8, 21.1, 19.4, 18.3, 18.2, -4.0, -4.6, -4.7; IR (film)  $\tilde{\nu}$  = 2954, 2929, 2856, 1717, 1463, 1362, 1255, 837, 775; MS (EI):  $m/z$ : 449 (84), 373 (6), 317 (16), 289 (7), 251 (100), 197 (8), 73 (64); HRMS (ESI):  $m/z$ : calc. for C<sub>28</sub>H<sub>50</sub>O<sub>4</sub>Si<sub>2</sub>Na: 529.3142 [M+Na]<sup>+</sup>, found: 529.3140.

**Compound 20.** HCl (2 M, 1 mL) was added to a solution of compound **19** (75 mg, 0.15 mmol) in THF

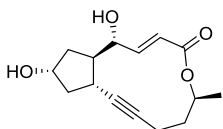

(5.5 mL) and water (5.5 mL). The mixture was stirred for 39 h before the reaction was quenched with sat. aq. NaHCO<sub>3</sub> (ca. 4 mL) and extracted with *tert*-butyl methyl ether (3 x 25 mL). The combined organic phases were dried over Na<sub>2</sub>SO<sub>4</sub>, filtered and concentrated and the residue was purified by flash chromatography

(SiO<sub>2</sub>, hexane/EtOAc, 1/2) to give the title compound as a white solid (38 mg, 92%). m.p. = 189-191 °C (CDCl<sub>3</sub>);  $[\alpha]_D^{20}$  = -13.7 (c = 0.66, acetone); <sup>1</sup>H NMR (400 MHz, CD<sub>3</sub>OD):  $\delta$  = 7.76 (dd,  $J$  = 15.5, 2.8 Hz, 1H), 5.90 (dd,  $J$  = 15.5, 2.0 Hz, 1H), 4.94-4.83 (m, 1H), 4.23-4.18 (m, 1H), 4.01 (dt,  $J$  = 9.4, 2.3 Hz, 1H), 2.47 (dddt,  $J$  = 11.2, 9.0, 5.0, 3.1 Hz, 1H), 2.38 (dd,  $J$  = 13.1, 8.6 Hz, 1H), 2.30-2.23 (m, 1H), 2.10-2.00 (m, 2H), 1.97-1.89 (m, 1H), 1.83-1.70 (m, 3H), 1.69-1.59 (m, 2H), 1.26 (d,  $J$  = 6.3 Hz, 3H), 1.18-1.10 (m, 1H); <sup>13</sup>C NMR (100 MHz, CD<sub>3</sub>OD):  $\delta$  = 168.4, 155.0, 118.0, 83.8, 82.8, 76.1, 72.7, 72.0, 54.5, 44.4, 41.6, 36.9, 32.7, 25.9, 21.1, 19.9; IR (film)  $\tilde{\nu}$  = 3364 (br), 3278 (br), 2970, 2948, 2926, 2865, 1711, 1438, 1258, 1111, 1064, 987; MS (ESI):  $m/z$ : 301 [M+Na]<sup>+</sup>; HRMS (ESI):  $m/z$ : calc. for C<sub>16</sub>H<sub>22</sub>O<sub>4</sub>Na: 301.1410 [M+Na]<sup>+</sup>, found: 301.1411. Crystals suitable for X-ray diffraction were obtained by slow evaporation of the solvent from a solution of the compound in MeOH/acetone.

**Compound 21.** In a flame dried Schlenk tube [Cp\**Ru*(MeCN)<sub>3</sub>]PF<sub>6</sub> (57 mg, 0.11 mmol, 5 mol-%) was

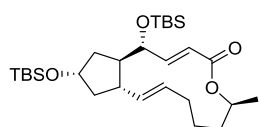

dissolved in CH<sub>2</sub>Cl<sub>2</sub> (15 mL). A solution of cycloalkyne **19** (1.15 g, 2.27 mmol) in CH<sub>2</sub>Cl<sub>2</sub> (5 mL) was added with stirring before this mixture was transferred under Ar via cannula into a pre-dried autoclave. The Schlenk tube was rinsed with additional CH<sub>2</sub>Cl<sub>2</sub> (8 mL), which was also added. The autoclave was

pressurized with H<sub>2</sub> (30 bar). After stirring for 4 h, the autoclave was vented and the remaining yellow solution filtered through a pad of neutral Al<sub>2</sub>O<sub>3</sub> which was carefully rinsed with EtOAc (50 mL). The combined filtrates were concentrated and the remaining pale brown oil was subjected to flash chromatography (neutral Al<sub>2</sub>O<sub>3</sub>, hexane/EtOAc, 90/1) to give a mixture of **21** and isomers (981 mg, 85%) (as well as a small amount of overreduced product). This material was purified by preparative HPLC (Nucleodur C18 HTec, 10 μm, 250 x 40, eluent MeOH/H<sub>2</sub>O 95/5, 75 mL/min) to give pure **21** as a colorless oil (642 mg, 56%).  $[\alpha]_D^{20} = +20.1$  [c = 0.9, CHCl<sub>3</sub>, lit.:<sup>[11]</sup>  $[\alpha]_D^{23} = +22$  (c 0.72, CHCl<sub>3</sub>)]; <sup>1</sup>H NMR (300 MHz, CDCl<sub>3</sub>): δ = 7.28 (dd, *J* = 3.2, 15.5 Hz, 1H), 5.87 (dd, *J* = 1.8, 15.5 Hz, 1H), 5.62 (ddd, *J* = 4.5, 10.1, 14.9 Hz, 1H), 5.26 (dd, *J* = 9.5, 15.2 Hz, 1H), 4.89 (ddq, *J* = 1.8, 6.3, 10.9 Hz, 1H), 4.22-4.16 (m, 1H), 4.01 (ddd, *J* = 1.7, 3.0, 9.2 Hz, 1H), 2.30-2.17 (m, 1H), 2.09-1.93 (m, 4H), 1.87-1.64 (m, 3H), 1.59-1.42 (m, 3H), 1.25 (d, *J* = 6.2 Hz, 3H), 1.00-0.93 (m, 1H), 0.93 (s, 9H), 0.88 (s, 9H), 0.06 (s, 3H), 0.04 (s, 3H), 0.03 (s, 3H), 0.02 (s, 3H); <sup>13</sup>C NMR (75 MHz, CDCl<sub>3</sub>): δ = 166.6, 152.6, 137.5, 129.5, 118.3, 76.6, 73.0, 71.5, 53.0, 44.0, 43.9, 42.3, 34.3, 32.0, 26.9, 26.0, 21.1, 18.3, 18.2, -3.9, -4.57, -4.60, -4.7; IR (film)  $\tilde{\nu}$  = 2954, 2930, 2857, 1716, 1472, 1462, 1361, 1254, 1122, 1078, 837, 775; MS (EI): *m/z*: 508 (3), 493 (2), 451 (100), 433 (18), 361 (24), 343 (13), 319 (33), 301 (18), 291 (12), 227 (13), 199 (26), 185 (11), 147 (12), 129 (11), 73 (62); HRMS (ESI): *m/z*: calc. for C<sub>28</sub>H<sub>52</sub>O<sub>4</sub>Si<sub>2</sub>Na: 531.3297 [M+Na]<sup>+</sup>, found: 531.3296.

**(+)-Brefeldin A (1).**<sup>[11]</sup> HCl (2 M in water, 8.2 mL) was added to a solution of compound **21** (632 mg,

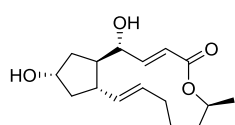

1.24 mmol) in THF (46 mL) and water (46 mL) and the resulting mixture was stirred for 39 h at ambient temperature. The reaction was quenched by the addition of aq. sat. NaHCO<sub>3</sub> and the aqueous layer extracted with *tert*-butyl methyl ether (3 x 50 mL). The combined extracts were dried over Na<sub>2</sub>SO<sub>4</sub>,

filtered and concentrated and the residue was purified by flash chromatography (SiO<sub>2</sub>, hexane/EtOAc, 1/2) to give (+)-brefeldin A as a white solid (327 mg, 94%). m.p. = 202-204 °C (MeOH, lit.:<sup>[12]</sup> 202-203 °C) ; <sup>1</sup>H NMR (400 MHz, CD<sub>3</sub>OD): δ = 7.46 (dd, *J* = 15.6, 3.0 Hz, 1H), 5.82 (dd, *J* = 15.7, 2.0 Hz, 1H), 5.75 (ddd, *J* = 4.6, 10.5, 15.0 Hz, 1H), 5.28 (dd, *J* = 9.6, 15.1 Hz, 1H), 4.80 (ddq, *J* = 1.8, 6.3, 11.0 Hz, 1H), 4.24-4.19 (m, 1H), 4.04 (ddd, *J* = 2.0, 3.1, 9.5 Hz, 1H), 2.39 (quint, *J* = 8.5 Hz, 1H), 2.13 (ddd, *J* = 5.3, 8.8, 13.2 Hz, 1H), 2.05-1.98 (m, 2H), 1.89-1.73 (m, 5H), 1.62-1.54 (m, 1H), 1.45 (dddd, *J* = 1.3, 5.4, 8.0, 13.3 Hz, 1H), 1.24 (d, *J* = 6.2 Hz, 3H), 0.94 – 0.85 (m, 1H); <sup>13</sup>C NMR (100 MHz, CD<sub>3</sub>OD): δ = 168.3, 155.1, 138.1, 131.4, 117.7, 76.6, 73.2, 73.0, 53.2, 45.4, 44.1, 41.8, 35.0, 33.0, 28.0, 21.1; IR (film)  $\tilde{\nu}$  = 3352 (br), 3307 (br), 2923, 2893, 2854, 2495, 2455, 1709, 1448, 1255, 1109, 1070, 975; MS (ESI): *m/z*: 303 [M+Na]<sup>+</sup>; HRMS (ESI): *m/z*: calc. for C<sub>16</sub>H<sub>24</sub>O<sub>4</sub>Na: 303.1567 [M+Na]<sup>+</sup>, found: 303.1567. Crystals suitable for X-ray diffraction were obtained by slow evaporation of the solvent from a solution of the compound in MeOH/acetone.



**Table S-1. Comparison of <sup>1</sup>H NMR data ([D<sub>4</sub>]-MeOH) of (+)-Brefeldin A**

| <i>observed</i> |                     | <i>literature</i> <sup>[12]</sup> |                 | $\Delta\delta$ (ppm) |
|-----------------|---------------------|-----------------------------------|-----------------|----------------------|
| $\delta$ , ppm  | <i>J</i> (Hz)       | $\delta$ , ppm                    | <i>J</i> (Hz)   |                      |
| 7.46            | 15.6, 3.0           | 7.45                              | 15.6, 3.0       | 0.01                 |
| 5.82            | 15.7, 2.0           | 5.82                              | 15.7, 2.0       | 0.00                 |
| 5.75            | 4.6, 10.5, 15.0     | 5.75                              | 4.6, 10.2, 15.0 | 0.00                 |
| 5.28            | 9.6, 15.1           | 5.27                              | 9.6, 15.1       | 0.01                 |
| 4.80            | 1.8, 6.3, 11.0      | 4.78                              | -               | 0.02                 |
| 4.24-4.19       | -                   | 4.21                              | -               | 0.00                 |
| 4.04            | 2.0, 3.1, 9.5       | 4.03                              | -               | 0.01                 |
| 2.39            | 8.5                 | 2.38                              | 8.7             | 0.01                 |
| 2.13            | 5.3, 8.8, 13.2      | 2.12                              | 5.4, 8.7, 13.6  | 0.01                 |
| 2.05-1.98       | -                   | 2.05-1.97                         | -               | 0.00                 |
| 1.89-1.73       | -                   | 1.90-1.70                         | -               | 0.01                 |
| 1.62-1.54       | -                   | 1.55                              | -               | 0.03                 |
| 1.45            | 1.3, 5.4, 8.0, 13.3 | 1.42                              | -               | 0.03                 |
| 1.24            | 6.2                 | 1.23                              | 6.2             | 0.01                 |
| 0.94-0.85       | -                   | 0.90                              | -               | 0.00                 |

**Table S-2. Comparison of <sup>13</sup>C NMR data ([D<sub>4</sub>]-MeOH) of (+)-Brefeldin A**

| <i>observed</i> | <i>literature</i> <sup>[12]</sup> | $\Delta\delta$ (ppm) |
|-----------------|-----------------------------------|----------------------|
| $\delta$ , ppm  | $\delta$ , ppm                    |                      |
| 168.3           | 168.7                             | -0.4                 |
| 155.1           | 155.4                             | -0.3                 |
| 138.1           | 138.4                             | -0.3                 |
| 131.4           | 131.7                             | -0.3                 |
| 117.7           | 118.1                             | -0.4                 |
| 76.6            | 76.9                              | -0.3                 |
| 73.2            | 73.5                              | -0.3                 |
| 73.0            | 73.3                              | -0.3                 |
| 53.2            | 53.5                              | -0.3                 |
| 45.4            | 45.8                              | -0.4                 |
| 44.1            | 44.4                              | -0.3                 |
| 41.8            | 42.1                              | -0.3                 |
| 35.0            | 35.3                              | -0.3                 |
| 33.0            | 33.3                              | -0.3                 |
| 28.0            | 28.3                              | -0.3                 |
| 21.1            | 21.3                              | -0.2                 |

## References

- [1] (a) J. Heppekausen, R. Stade, R. Goddard, A. Fürstner, *J. Am. Chem. Soc.* **2010**, *132*, 11045-11057; (b) J. Heppekausen, R. Stade, A. Kondoh, G. Seidel, R. Goddard, A. Fürstner, *Chem. Eur. J.* **2012**, *18*, 10281-10299.
- [2] M. D. Mbaye, B. Demerseman, J.-L. Renaud, L. Toupet, C. Bruneau, *Adv. Synth. Catal.* **2004**, *346*, 835-841.
- [3] J. E. Ladbury, E. E. Turner, *J. Chem. Soc.* **1954**, 3885-3886.
- [4] (a) H.-J. Gais, T. Lied, *Angew. Chem.* **1984**, *96*, 143-145; (b) S. Kobayashi, K. Kamiyama, T. Imori, M. Ohno, *Tetrahedron Lett.* **1984**, *25*, 2557-2560.
- [5] Y. N. Ito, X. Ariza, A. K. Beck, A. Boháč, C. Ganter, R. E. Gawley, F. N. M. Kühnle, J. Tuleja, Y. M. Wang, D. Seebach, *Helv. Chim. Acta* **1994**, *77*, 2071-2110.
- [6] H.-J. Gais, K. L. Lukas, W. A. Ball, S. Braun, H. J. Lindner, *Liebigs Ann. Chem.* **1986**, 687-716.
- [7] Compare: Å. Rosenquist, I. Kvarnström, S. C. T. Svensson, B. Classon, B. Samuelsson, *Acta. Chem. Scandinavia* **1992**, *46*, 1127-1129.
- [8] A. M. Gimazetdinov, G. V. Ishmurzina, M. S. Miftakhov, *Russ. J. Org. Chem.* **2012**, *48*, 8-17.
- [9] In analogy to: N. Kojima, S. Nishijima, K. Tsuge, T. Tanaka, *Org. Biomol. Chem.* **2011**, *9*, 4425-4428.
- [10] Compare: C. T. Meta, K. Koide, *Org. Lett.* **2004**, *6*, 1785-1787.
- [11] Y. Wu, X. Shen, Y.-Q. Yang, Q. Hu, J.-H. Huang, *J. Org. Chem.* **2004**, *69*, 3857-3865.
- [12] Y. Wu, X. Shen, Y.-Q. Yang, Q. Hu, J.-H. Huang, *Tetrahedron Lett.* **2004**, *45*, 199-202.
- [13] Modified from procedure of: V. Hickmann, A. Kondoh, B. Gabor, M. Alcarazo, A. Fürstner, *J. Am. Chem. Soc.* **2011**, *133*, 13471-13480.
- [14] P. Persich, J. Llaveria, R. Lhermet, T. de Haro, R. Stade, A. Kondoh, A. Fürstner, *Chem. Eur. J.* **2013**, *19*, 13047-13058.
- [15] E. Bartmann, B. Bogdanović, N. Janke, S. Liao, K. Schlichte, B. Spliethoff, J. Treber, U. Westeppe, U. Wilczok, *Chem. Ber.* **1990**, *123*, 1517-1528.
- [16] E. J. Corey, S. Shibata, R. K. Bakshi, *J. Org. Chem.* **1988**, *53*, 2861-2863.

mz12028.10.fid  
FUM-FA-053-01

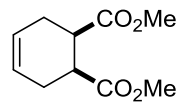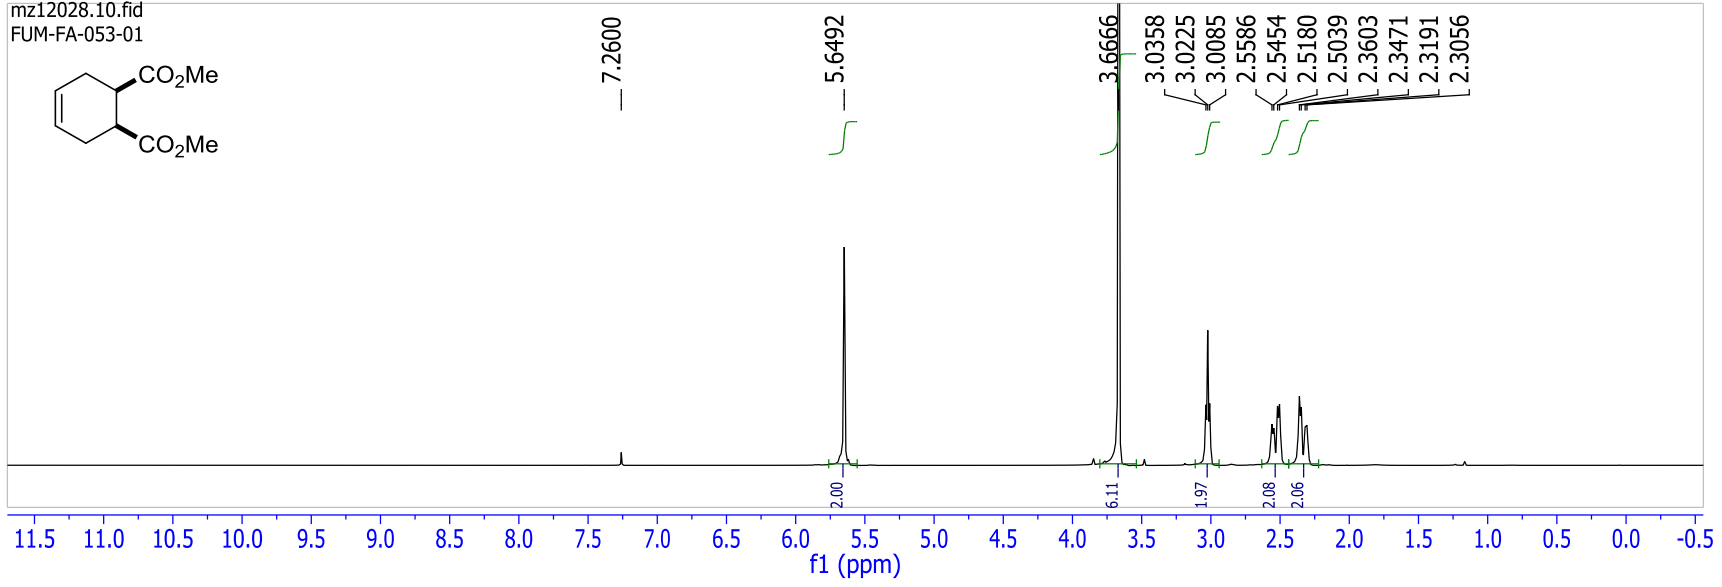

mz12028.11.fid  
FUM-FA-053-01

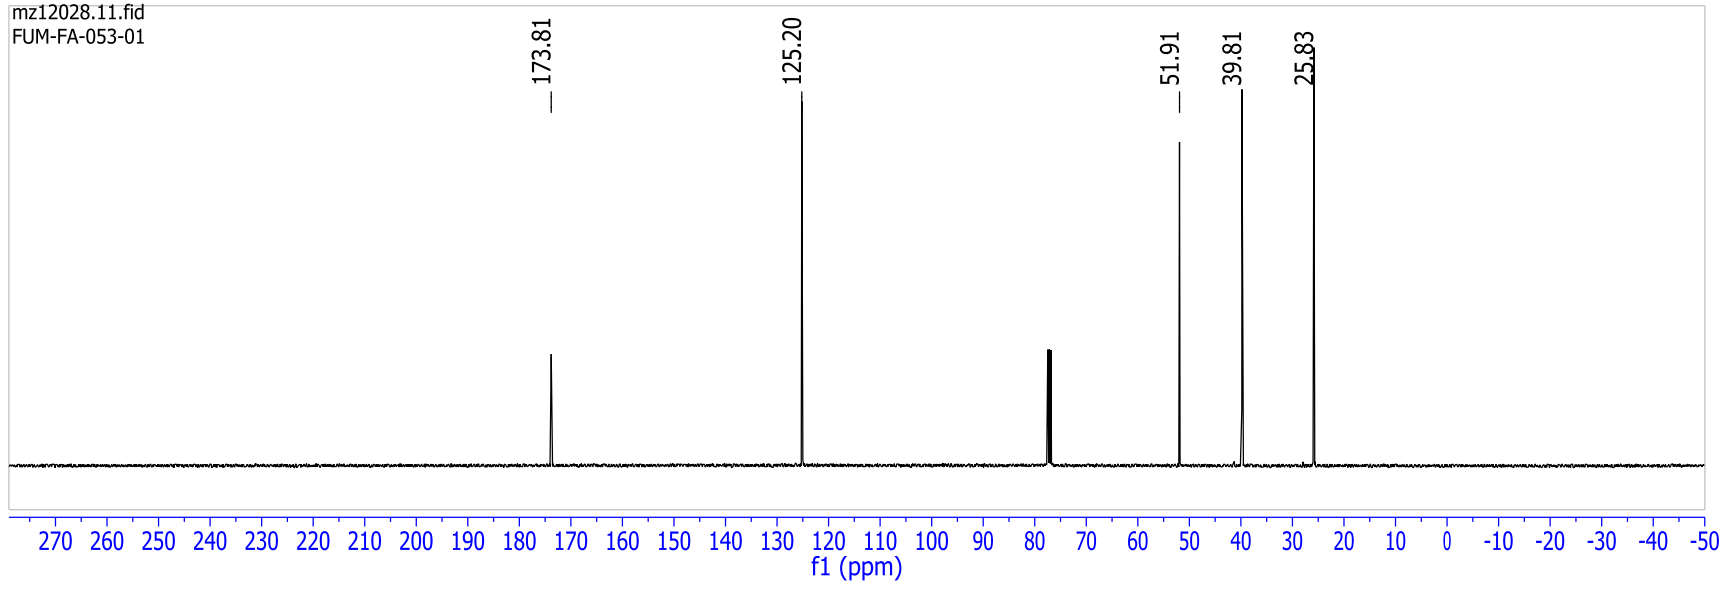

jn03005.10.fid  
FUM-FA-069-02

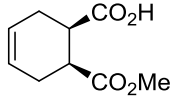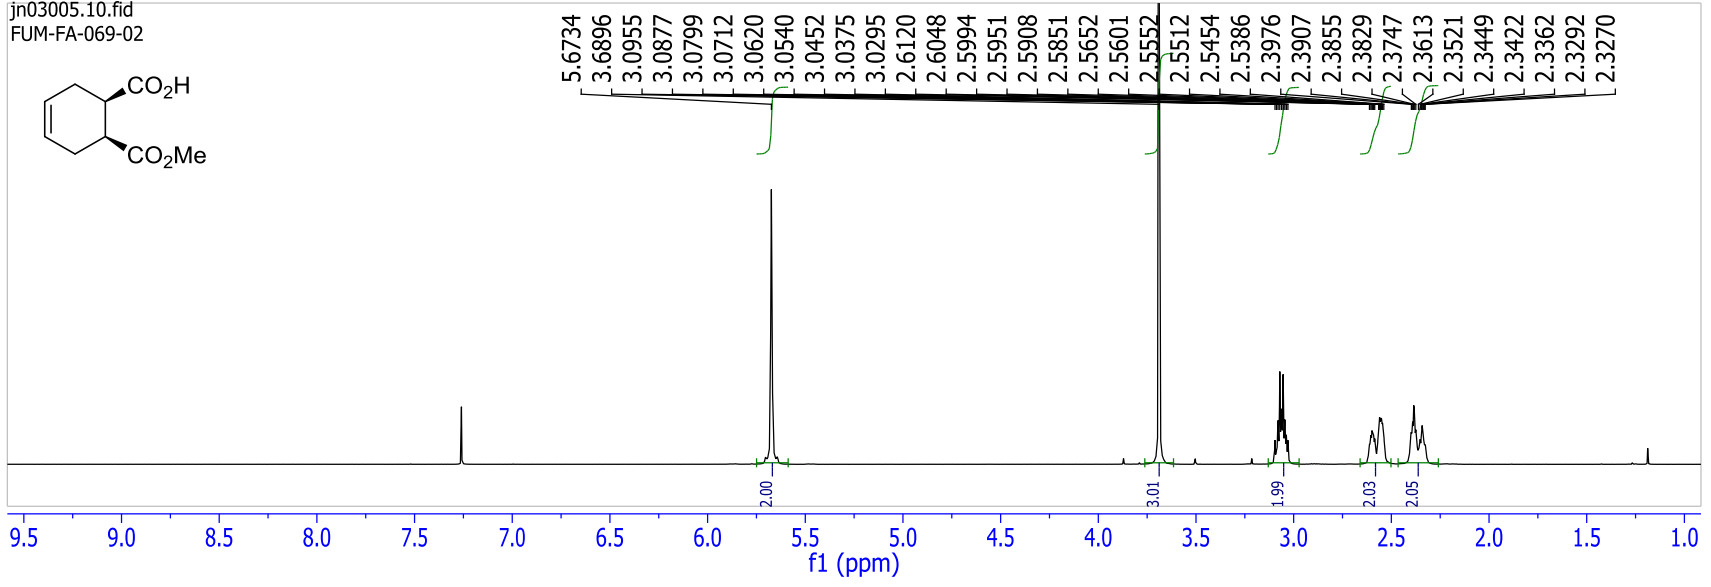

jn03005.11.fid  
FUM-FA-069-02

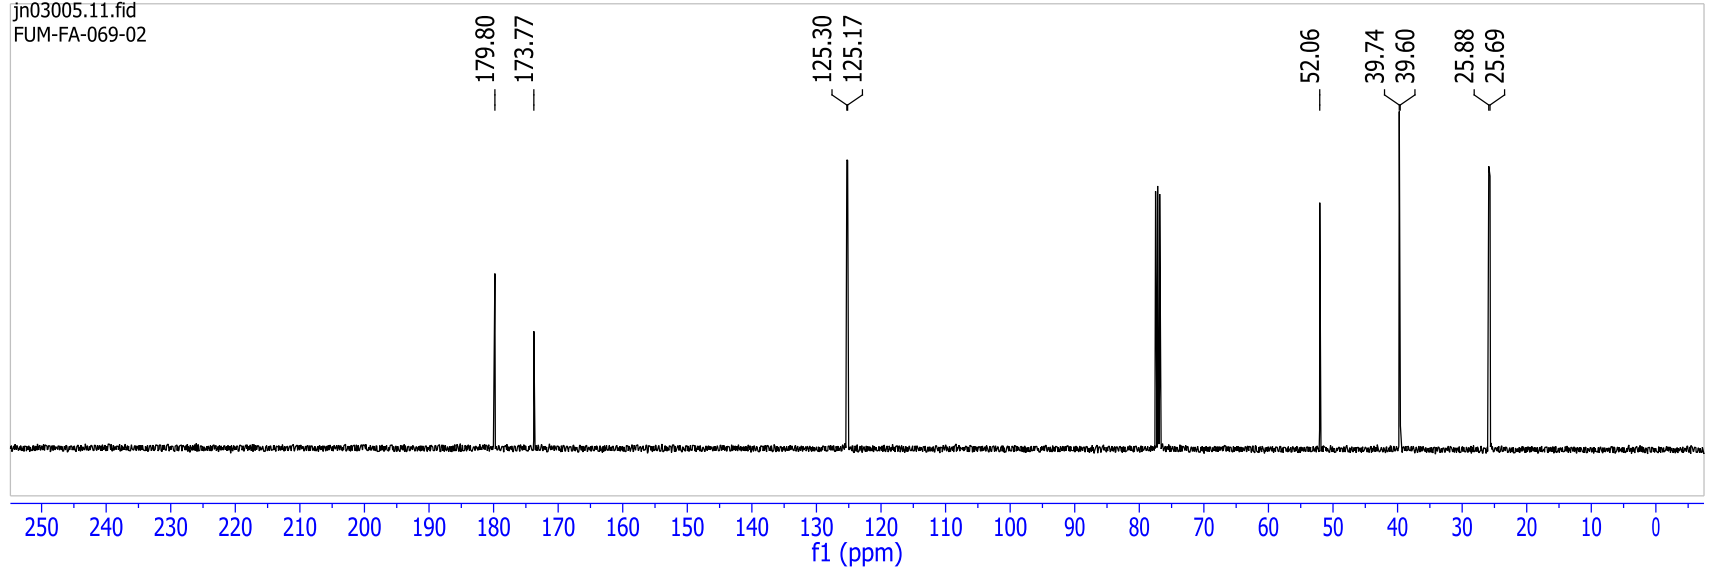

al25004.10.fid  
FUM-FA-111-03

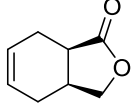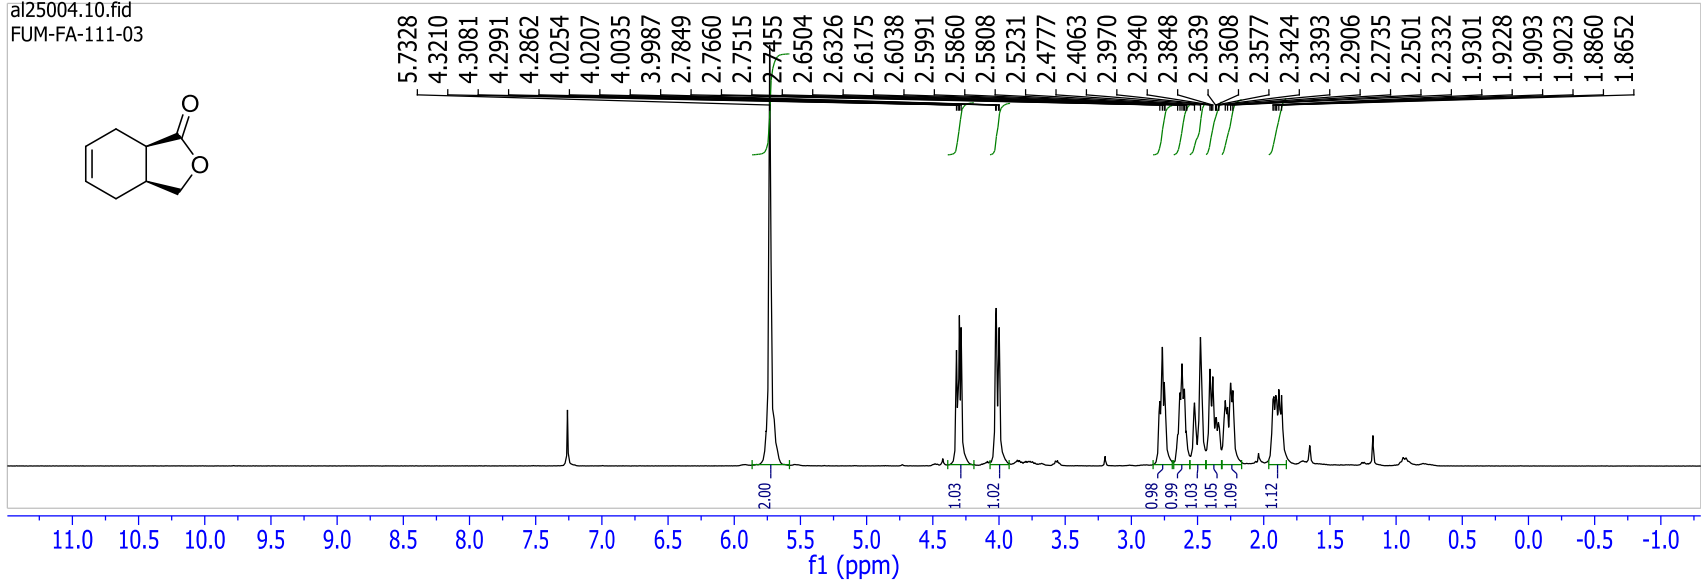

al25004.11.fid  
FUM-FA-111-03

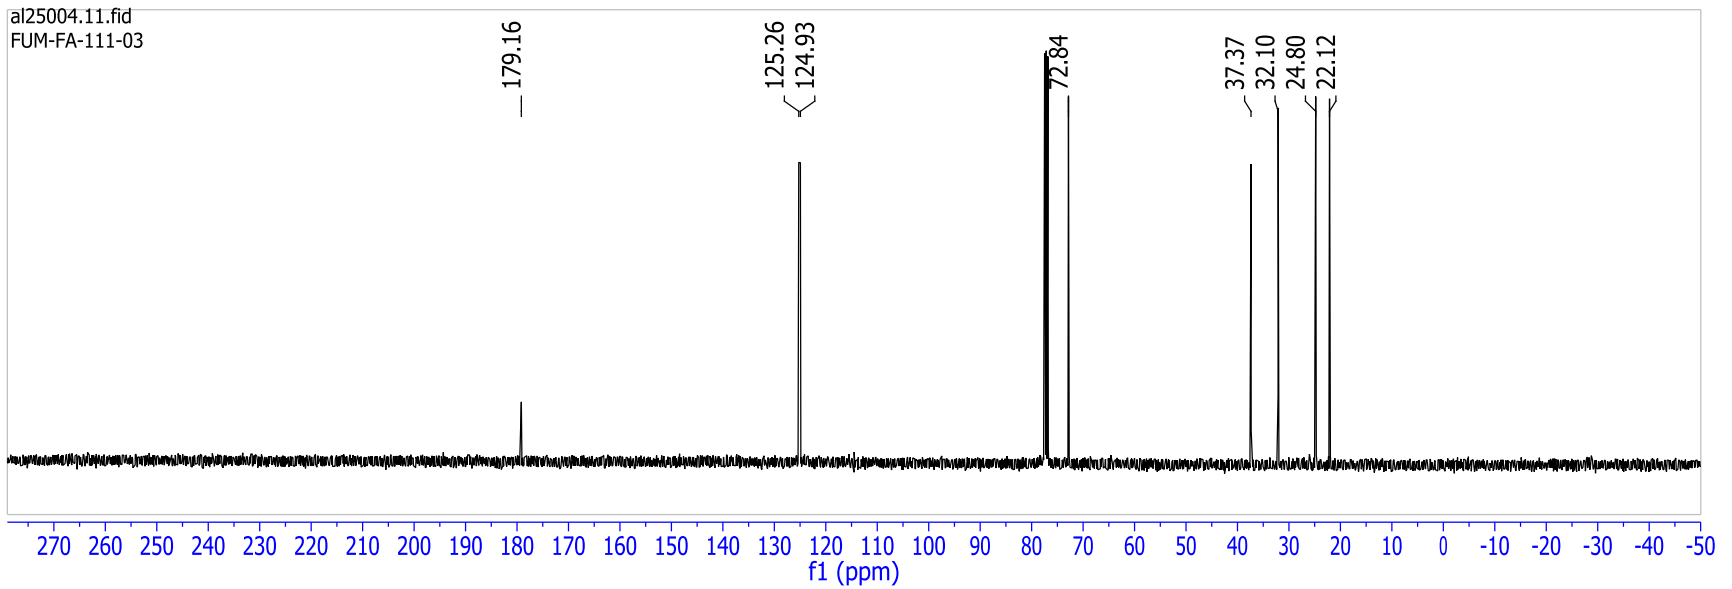

mz27036.10.fid  
FUM-FA-073-03

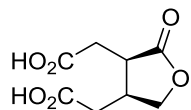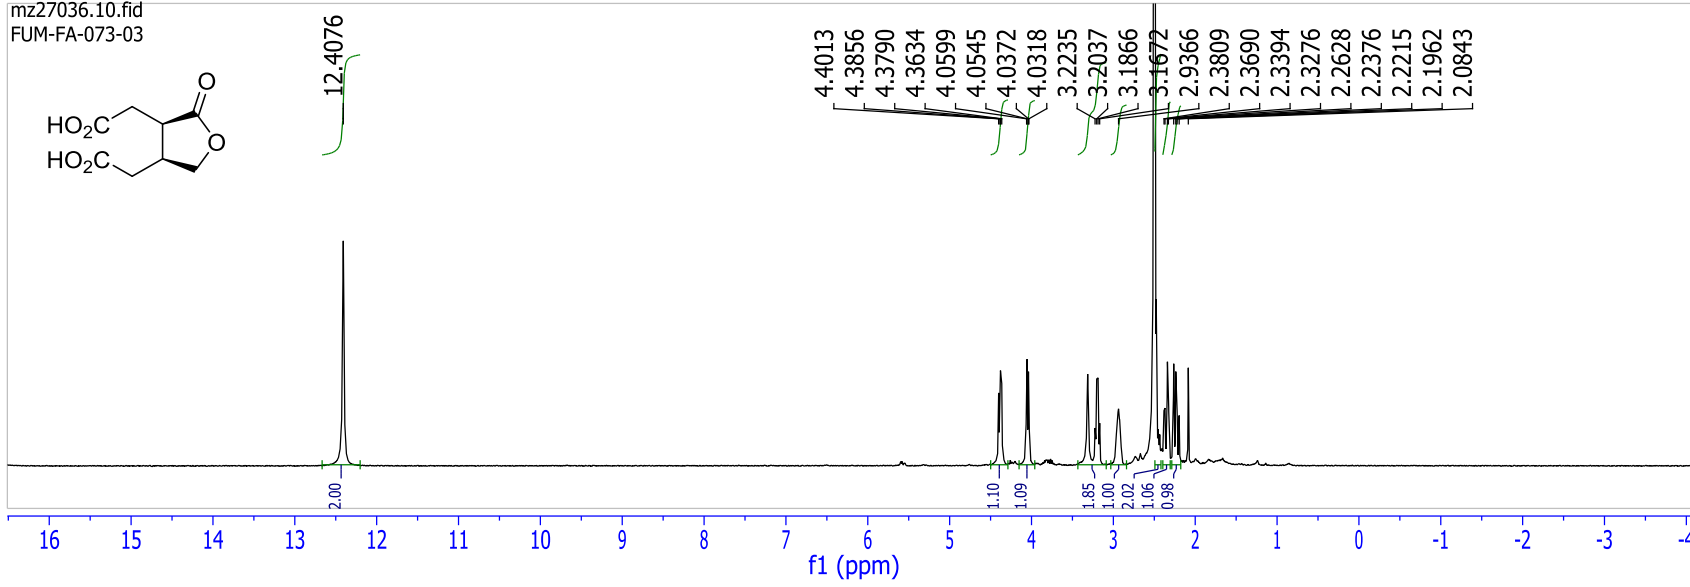

mz28002.10.fid  
FUM-FA-073-03

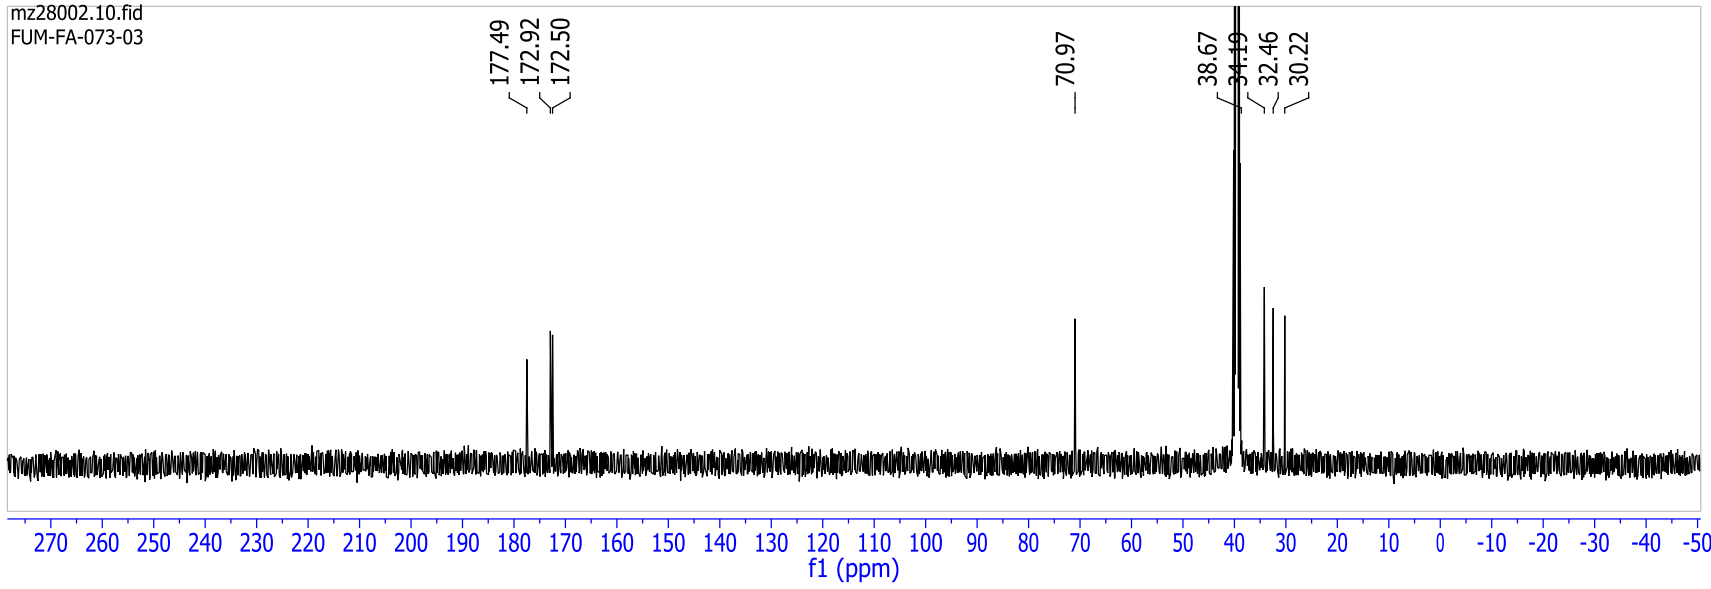

mz28023.10.fid  
FUM-FA-078-01

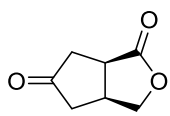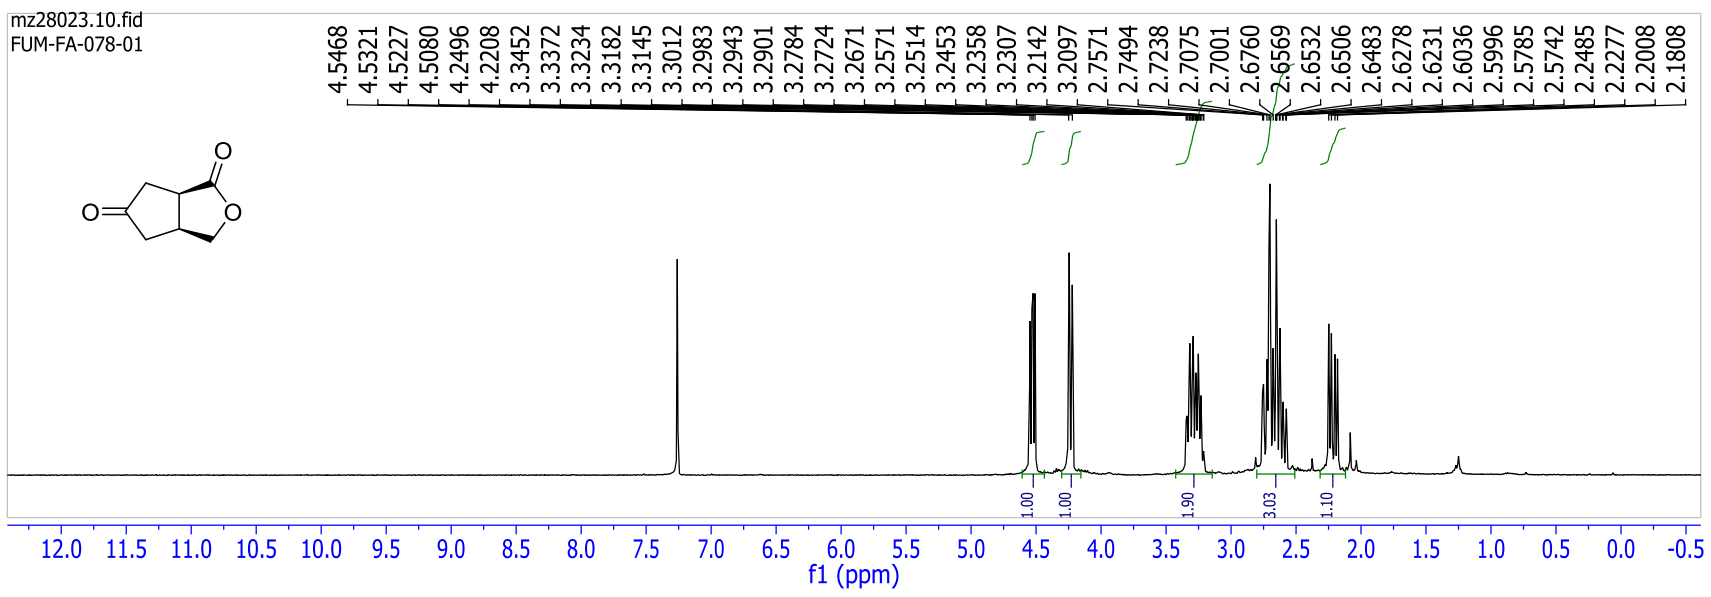

mz28023.11.fid  
FUM-FA-078-01

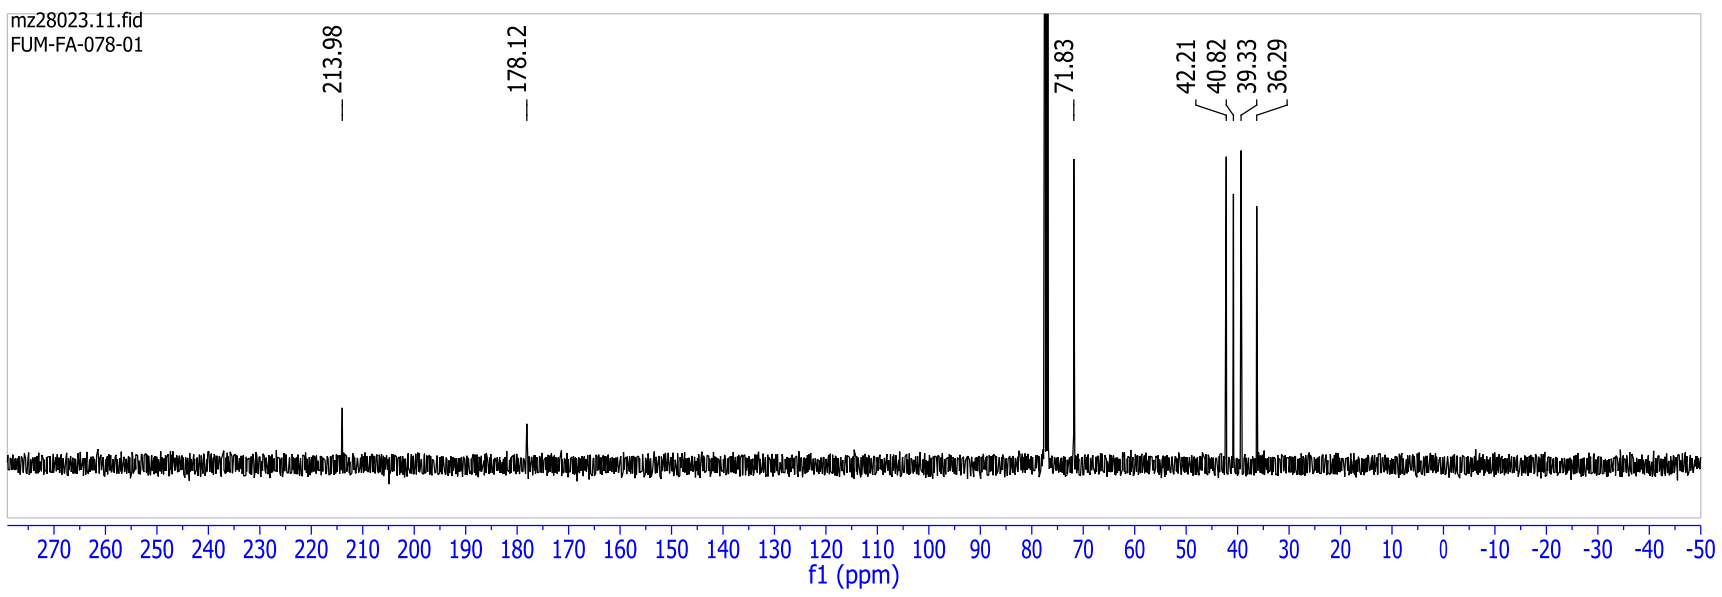

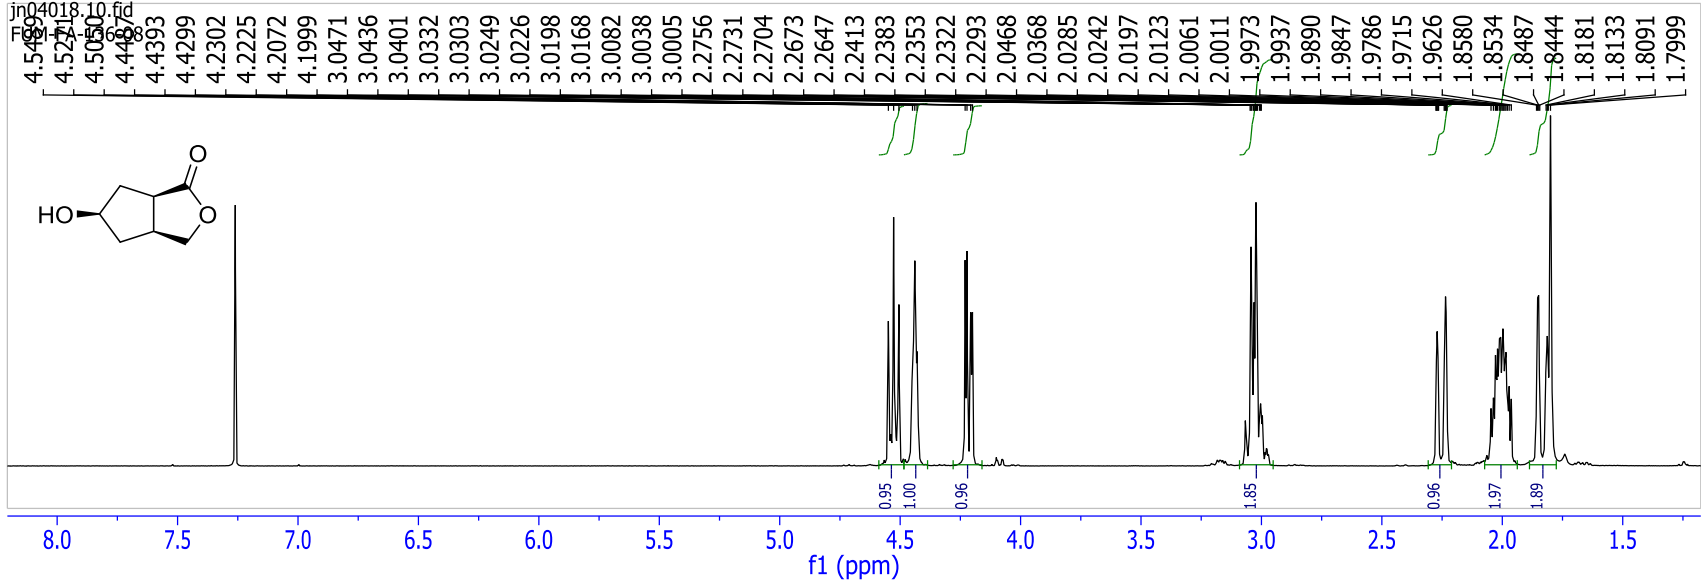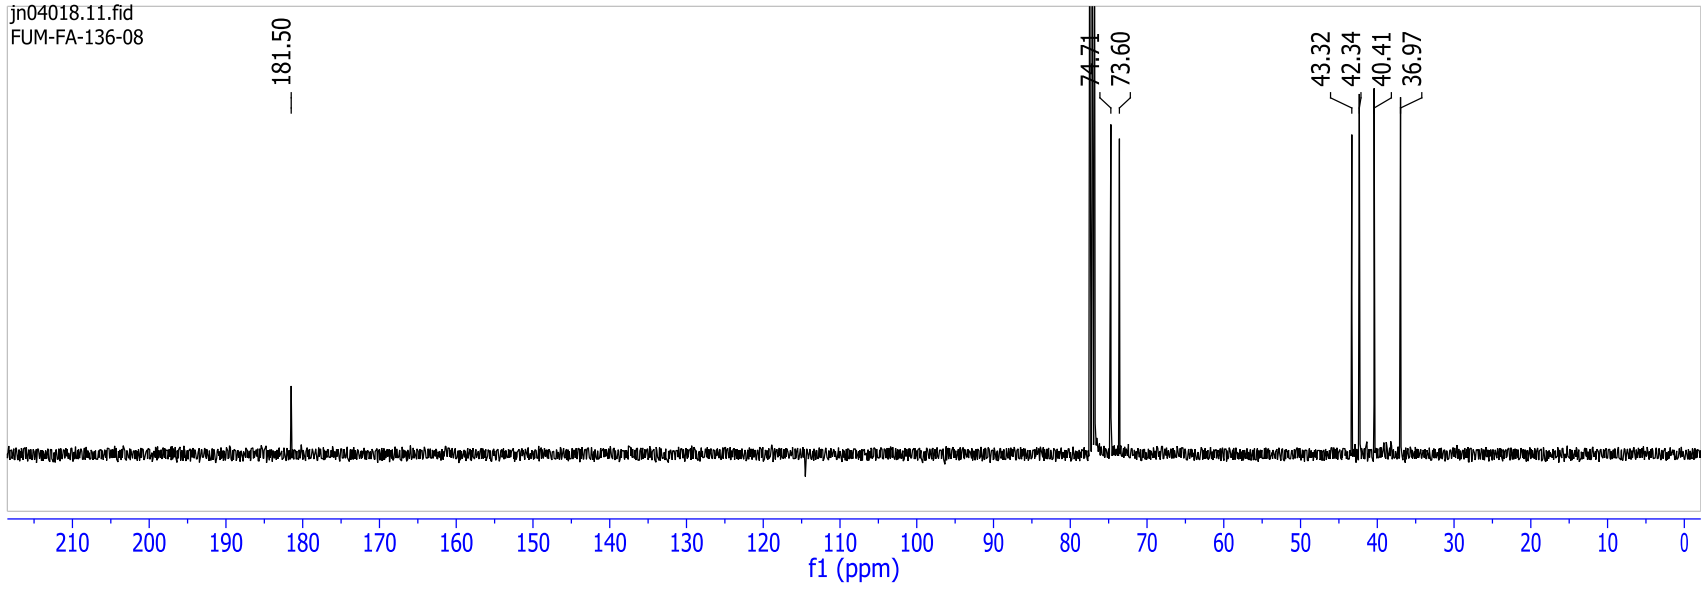



al08055.10.fid  
FUM-FA-086-06

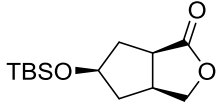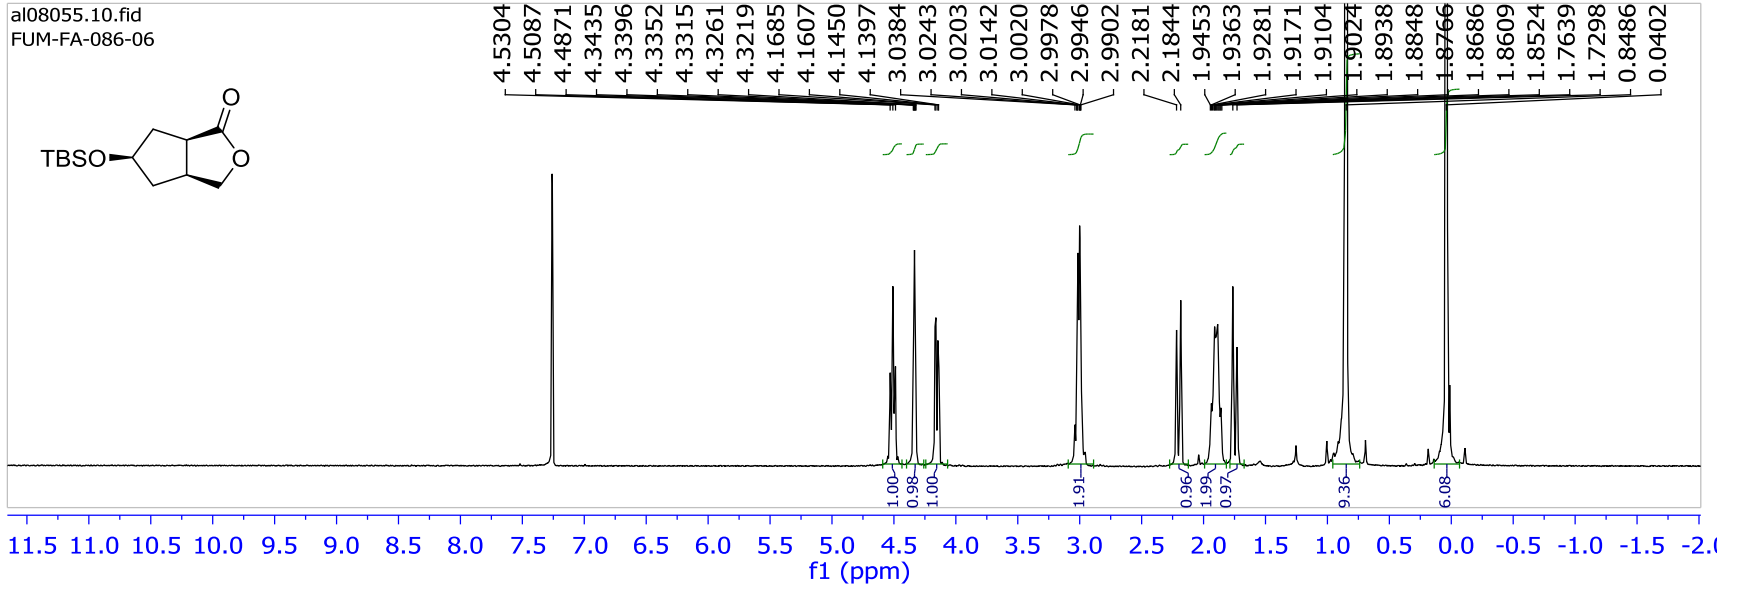

al08055.11.fid  
FUM-FA-086-06

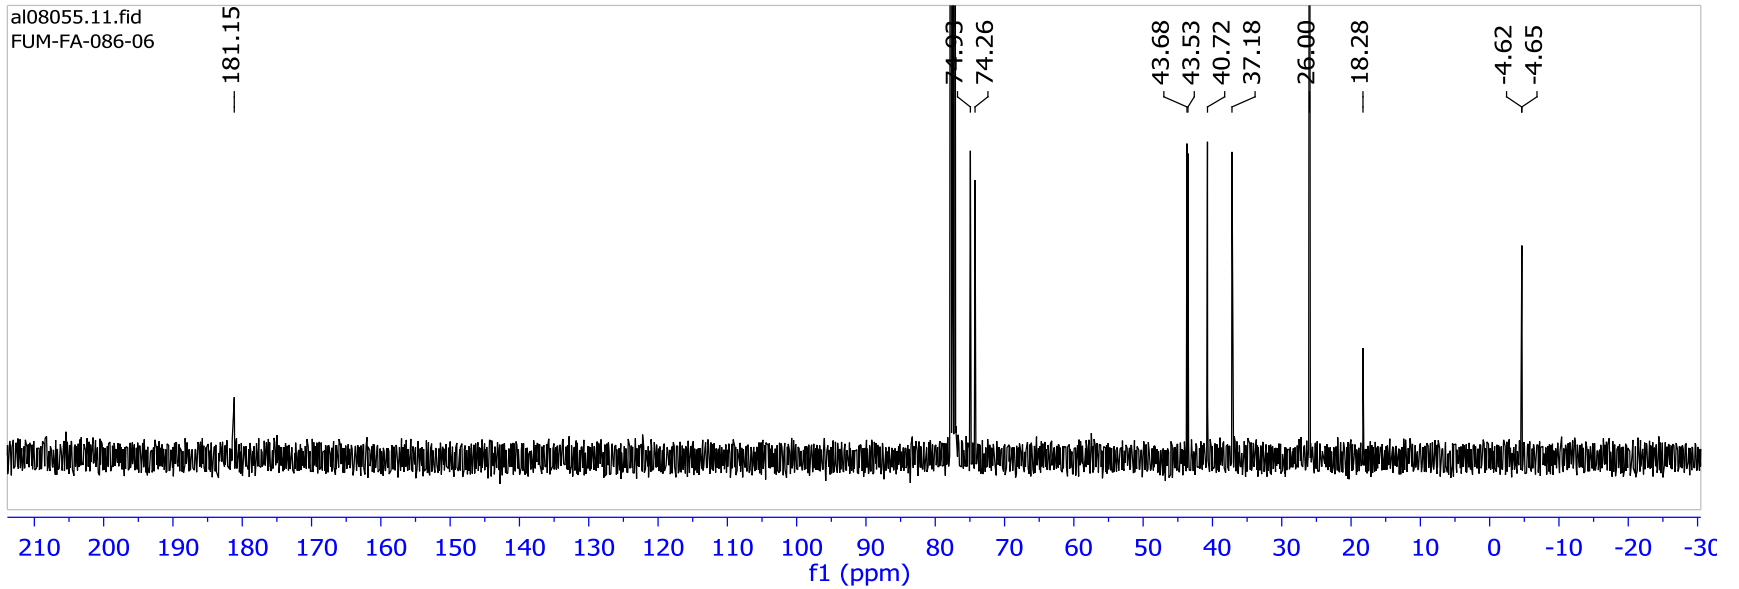

sr19068.10.fid  
FUM-FB-350-07

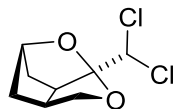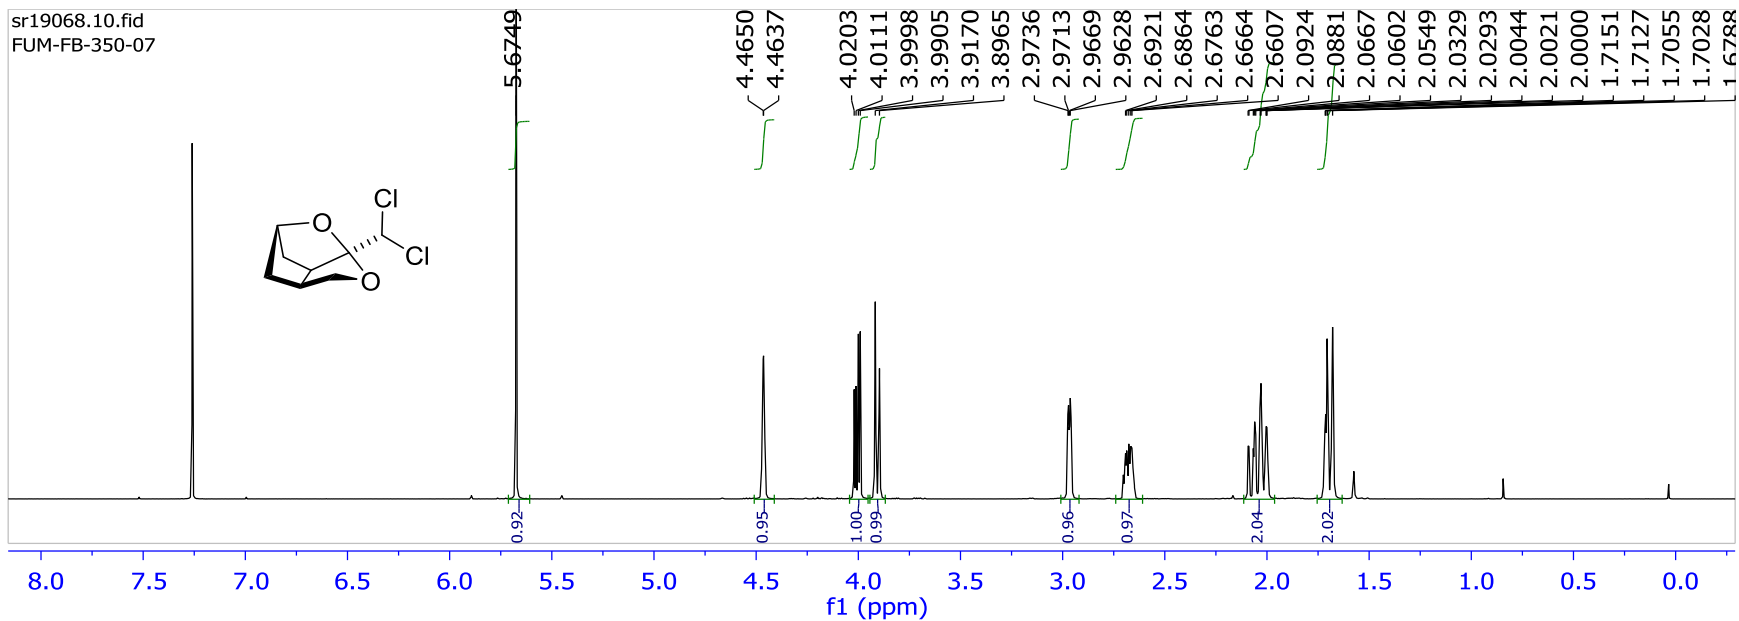

sr19068.11.fid  
FUM-FB-350-07

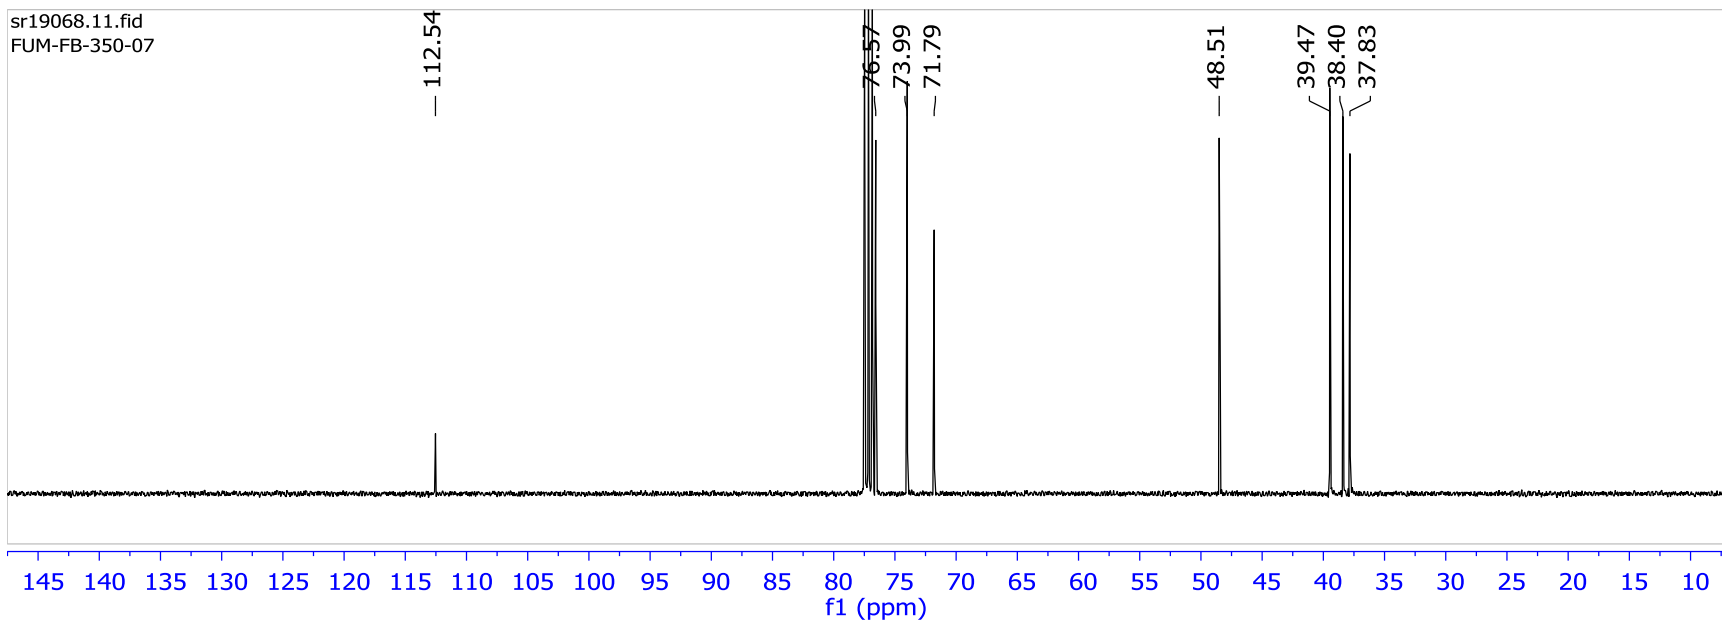

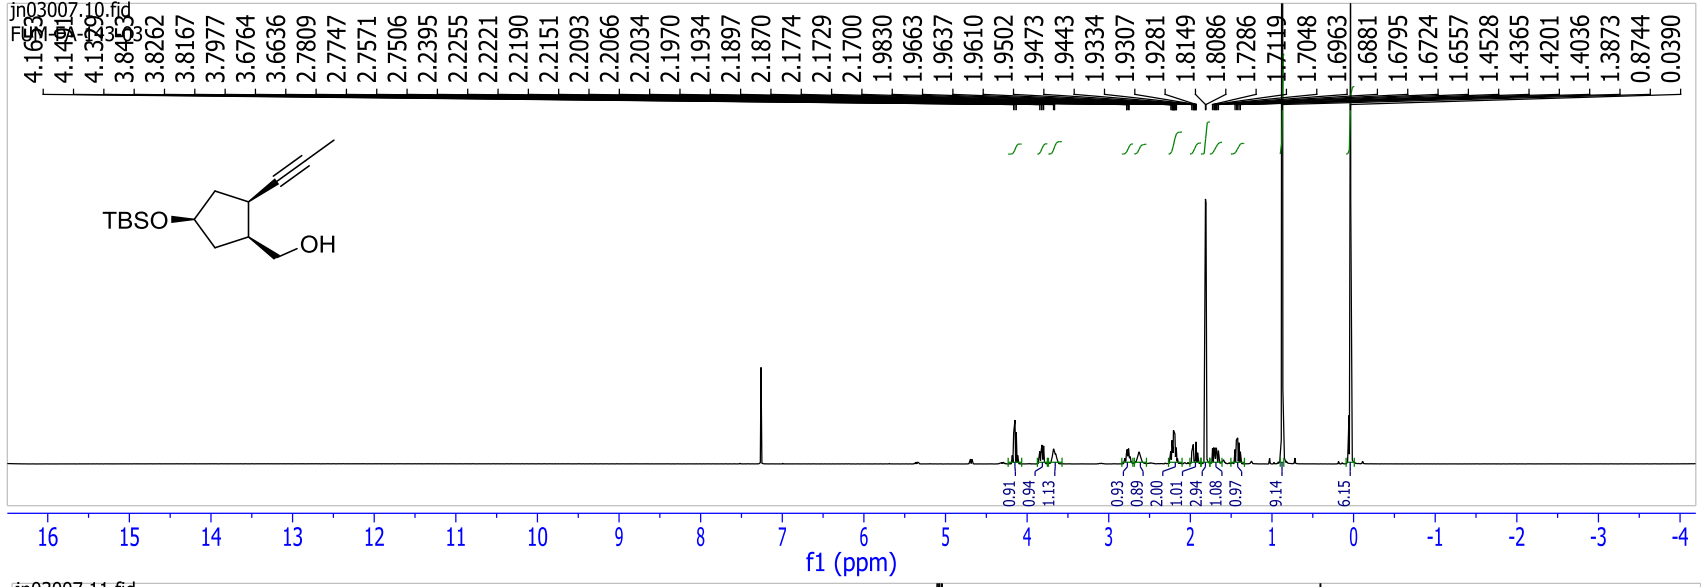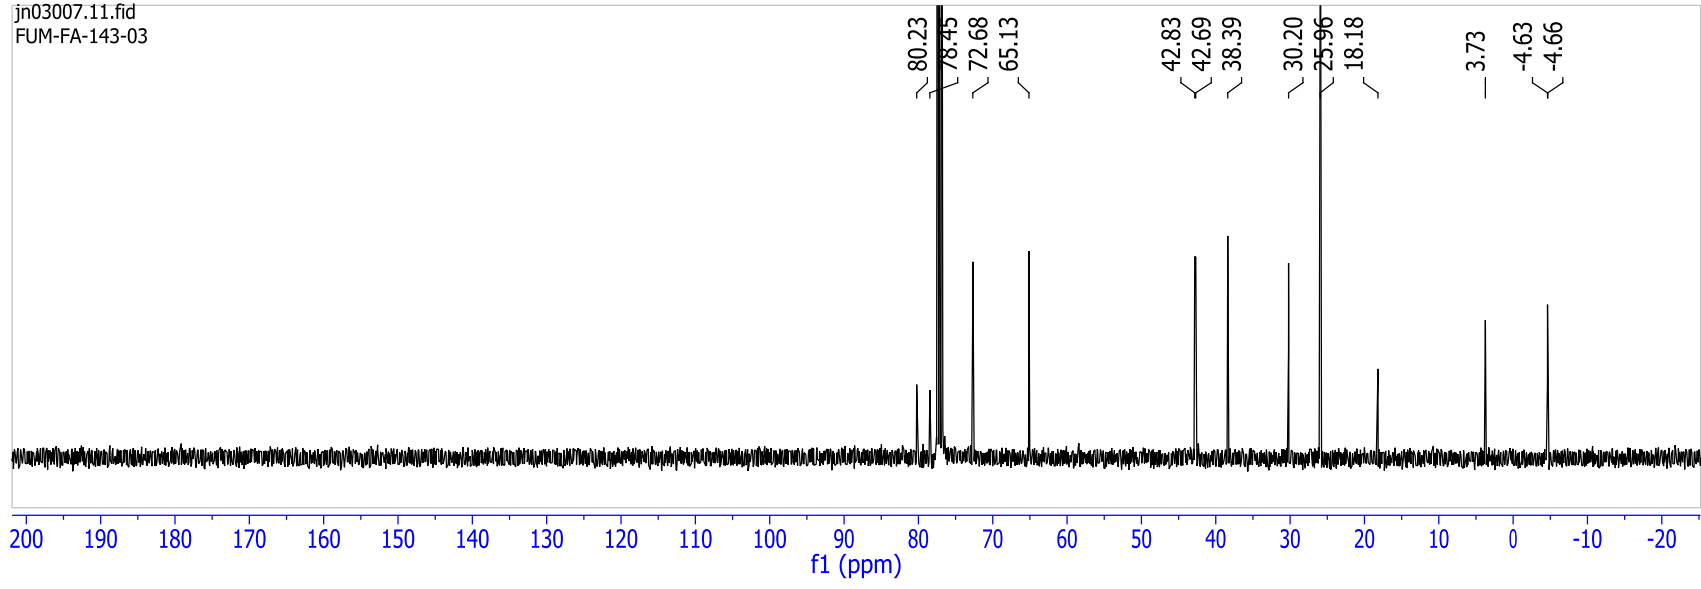

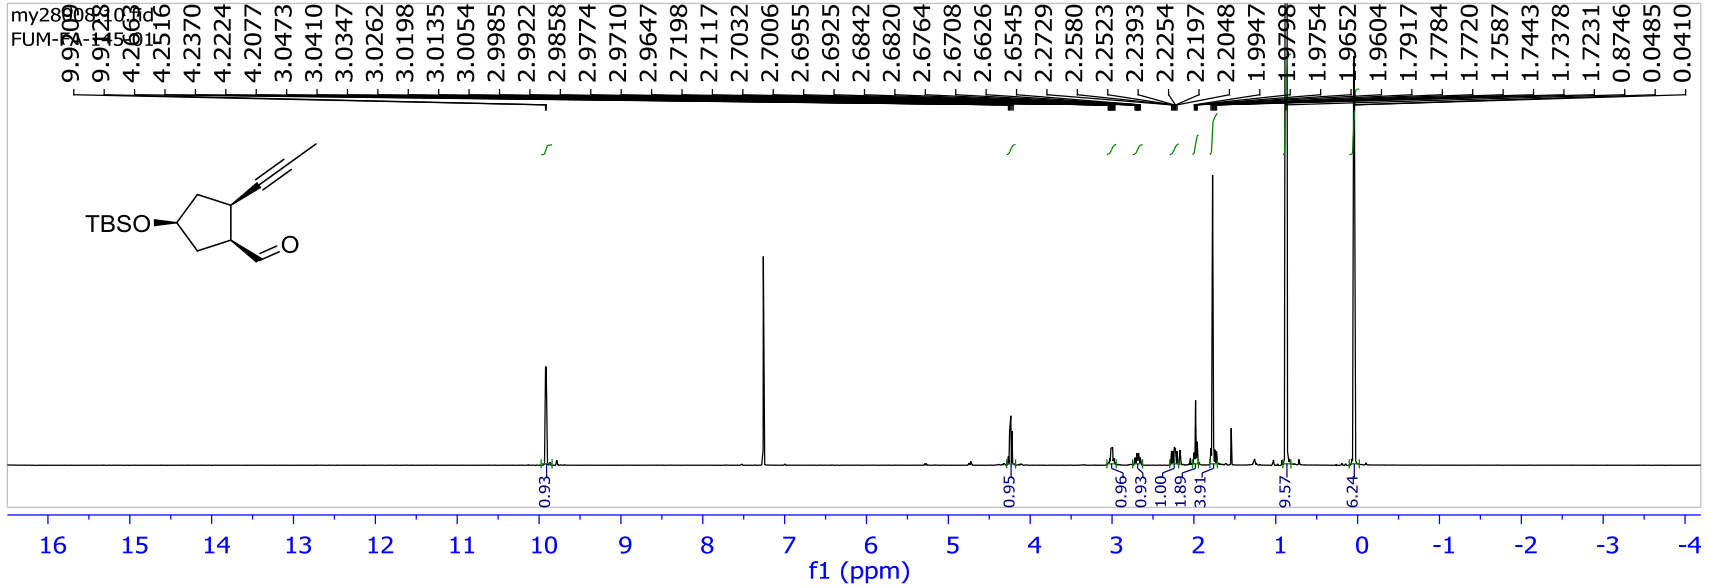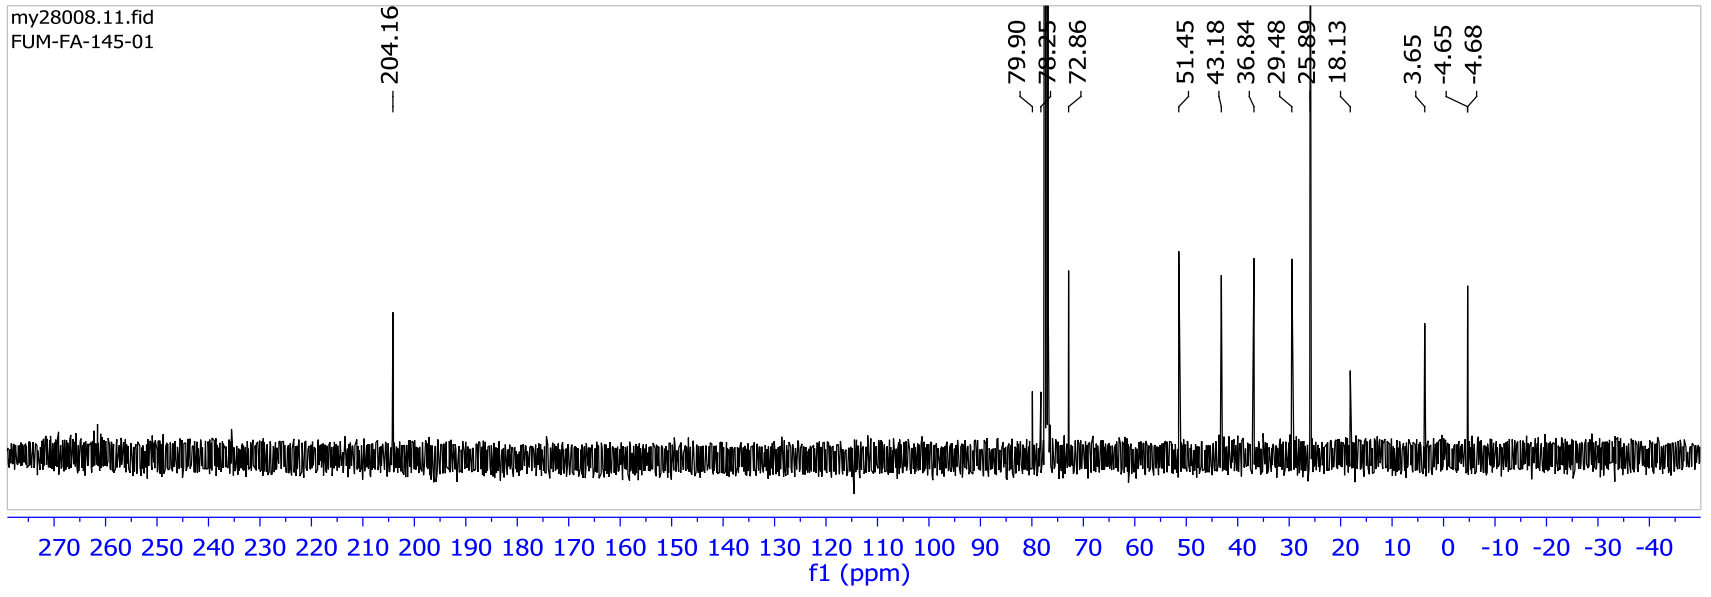

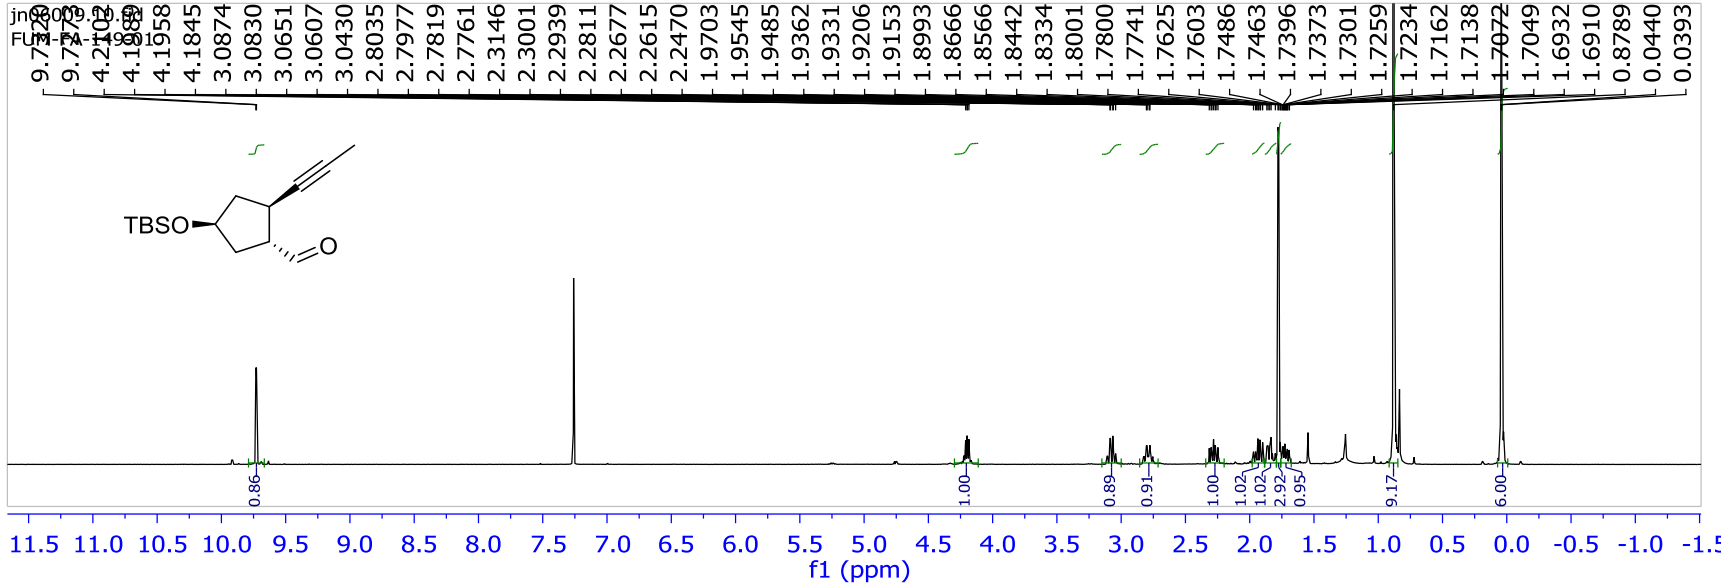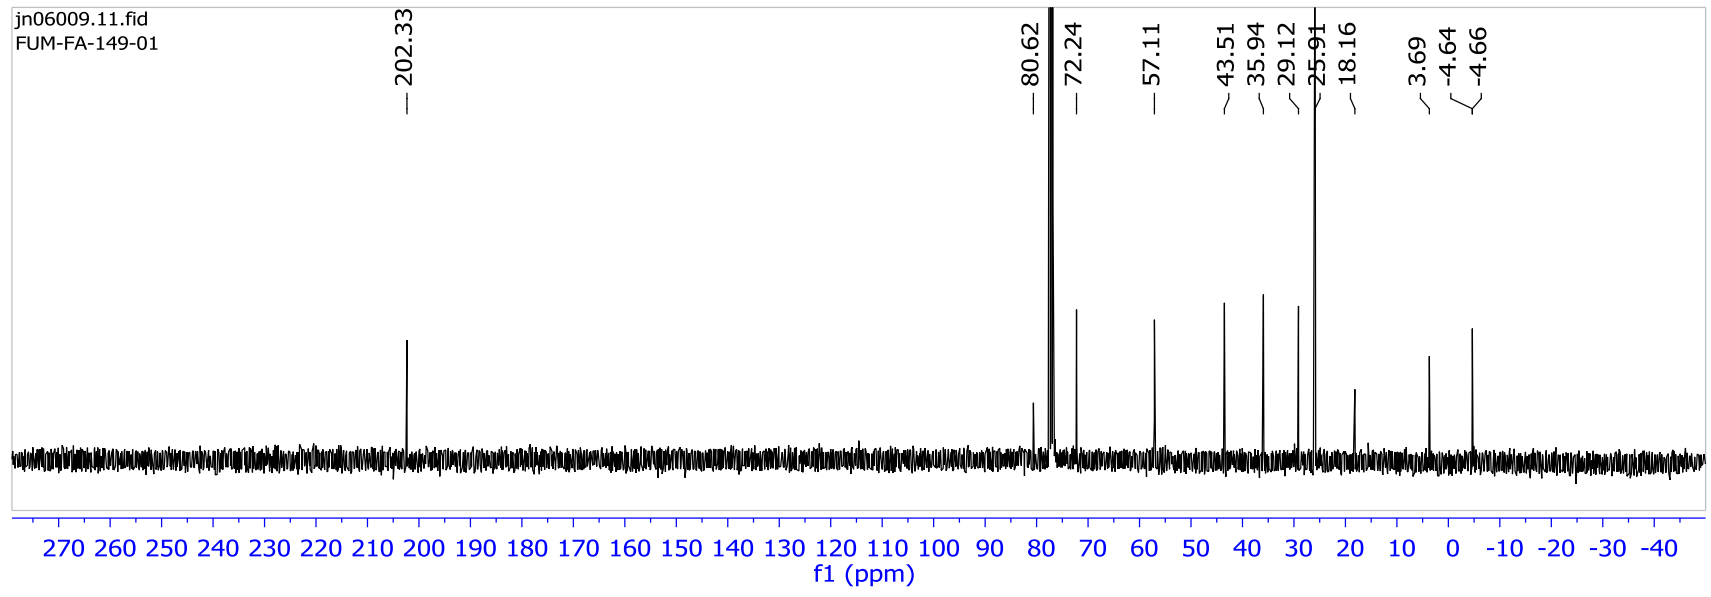

jr16035.10.fid  
FUM-FB-252-05

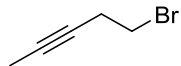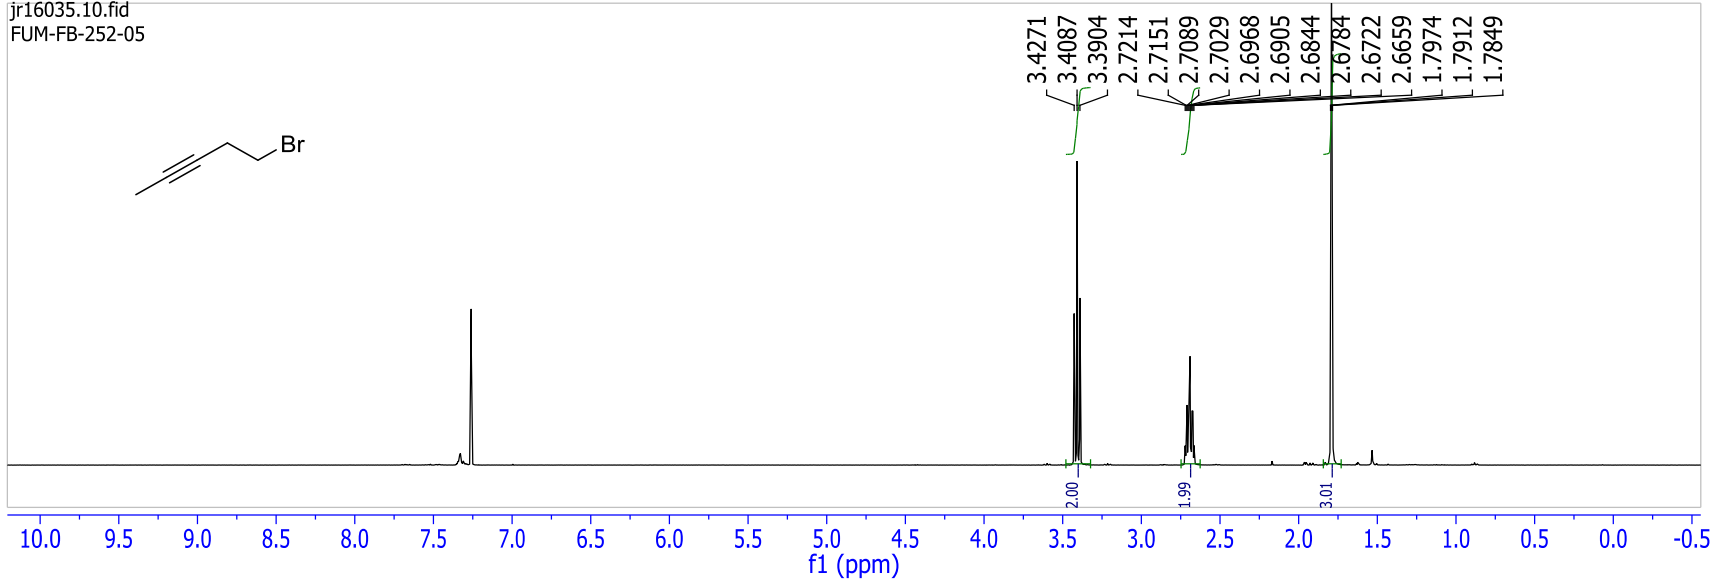

jr16035.11.fid  
FUM-FB-252-05

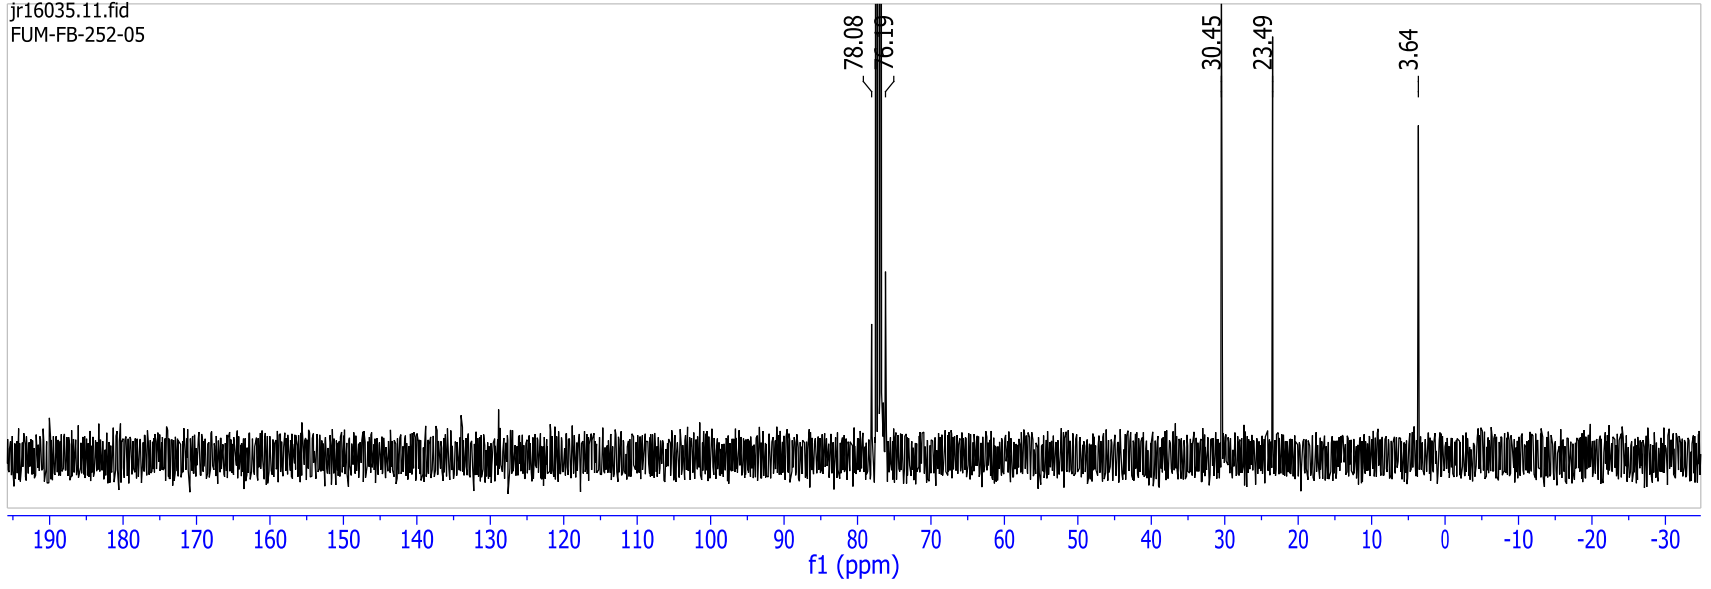

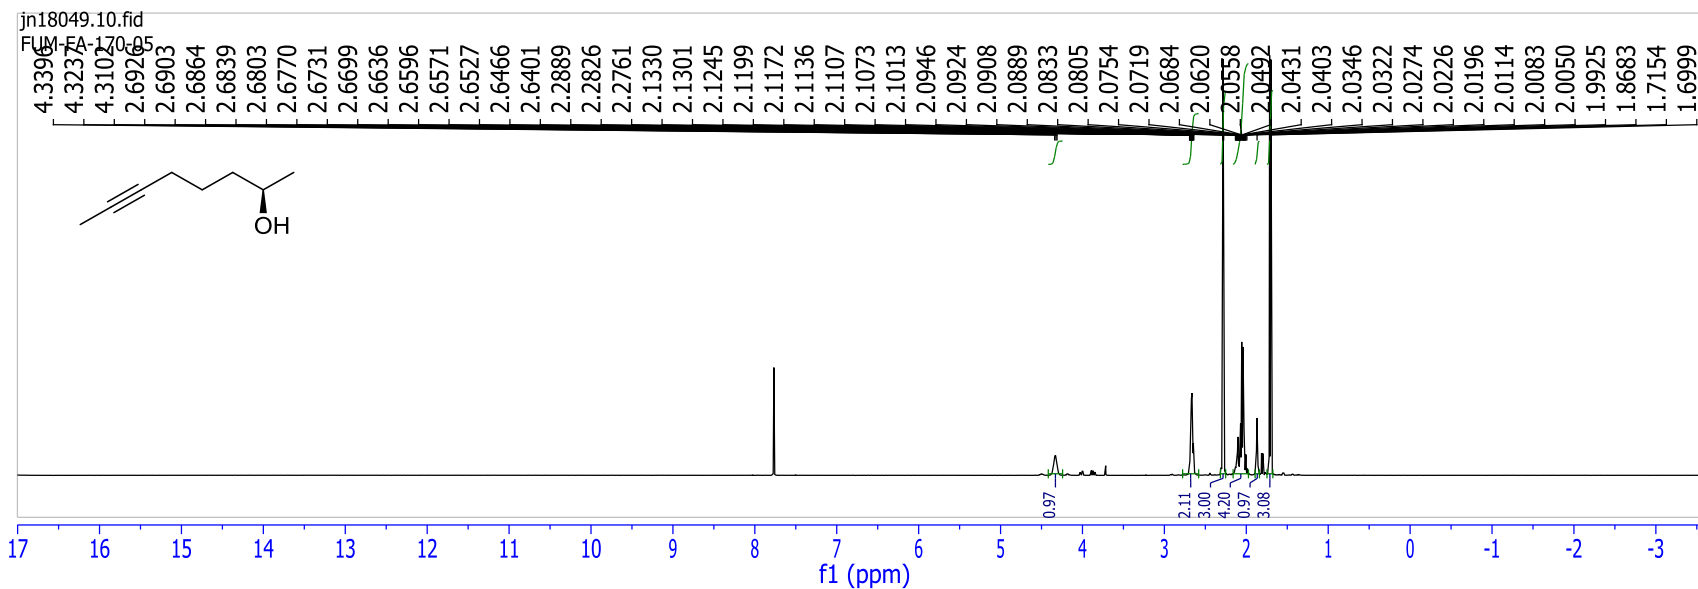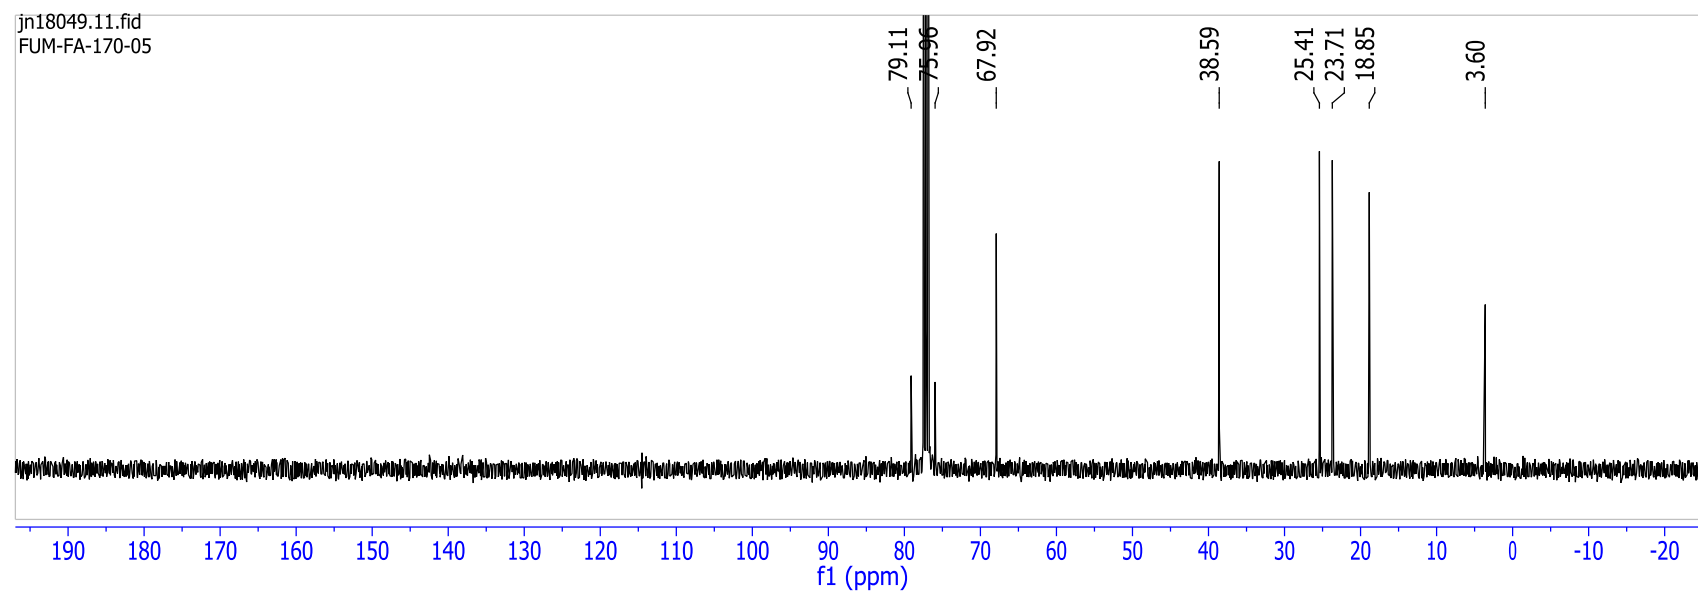

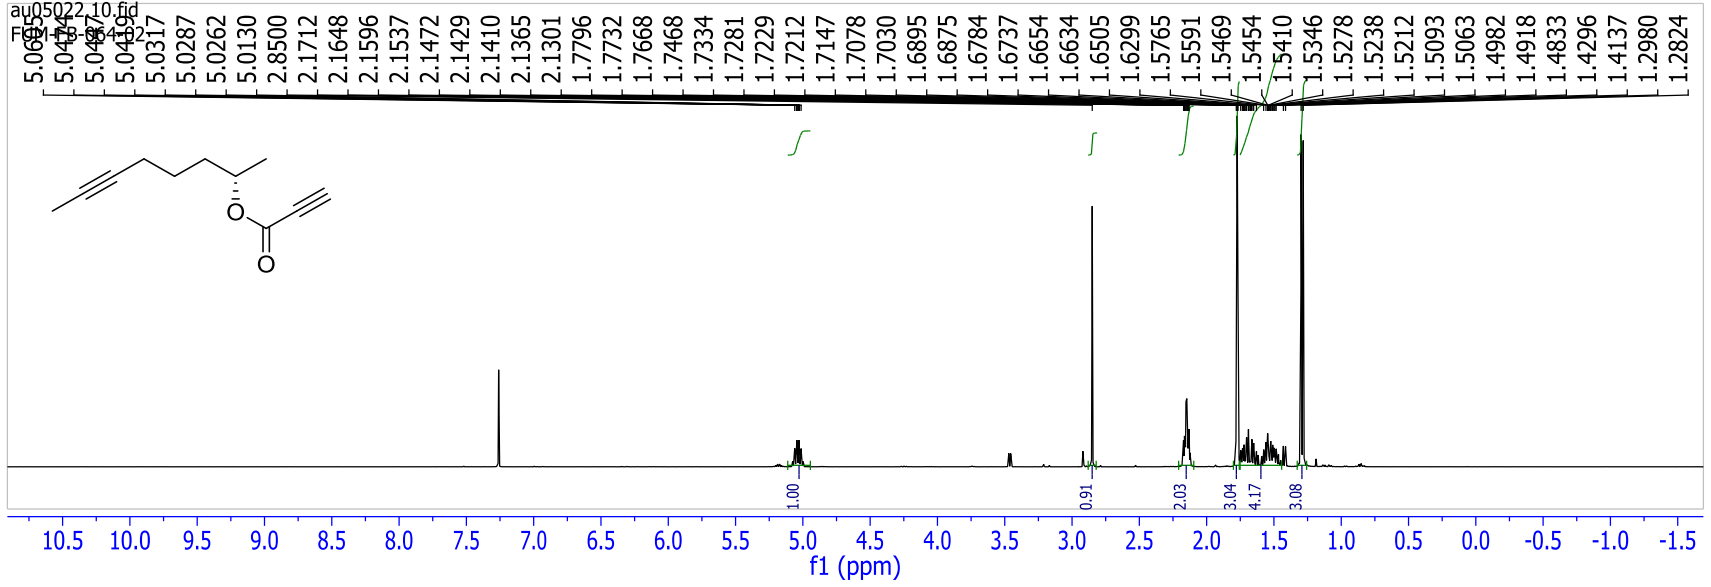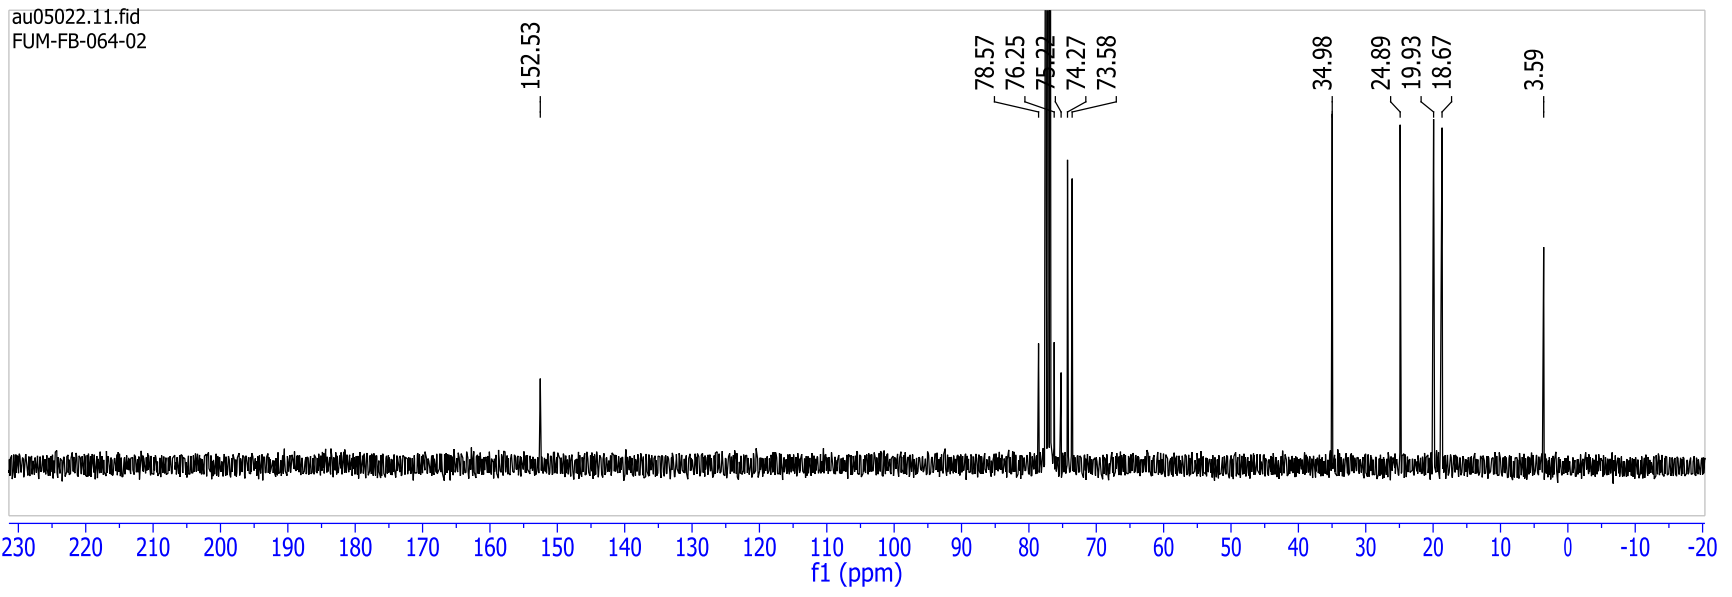



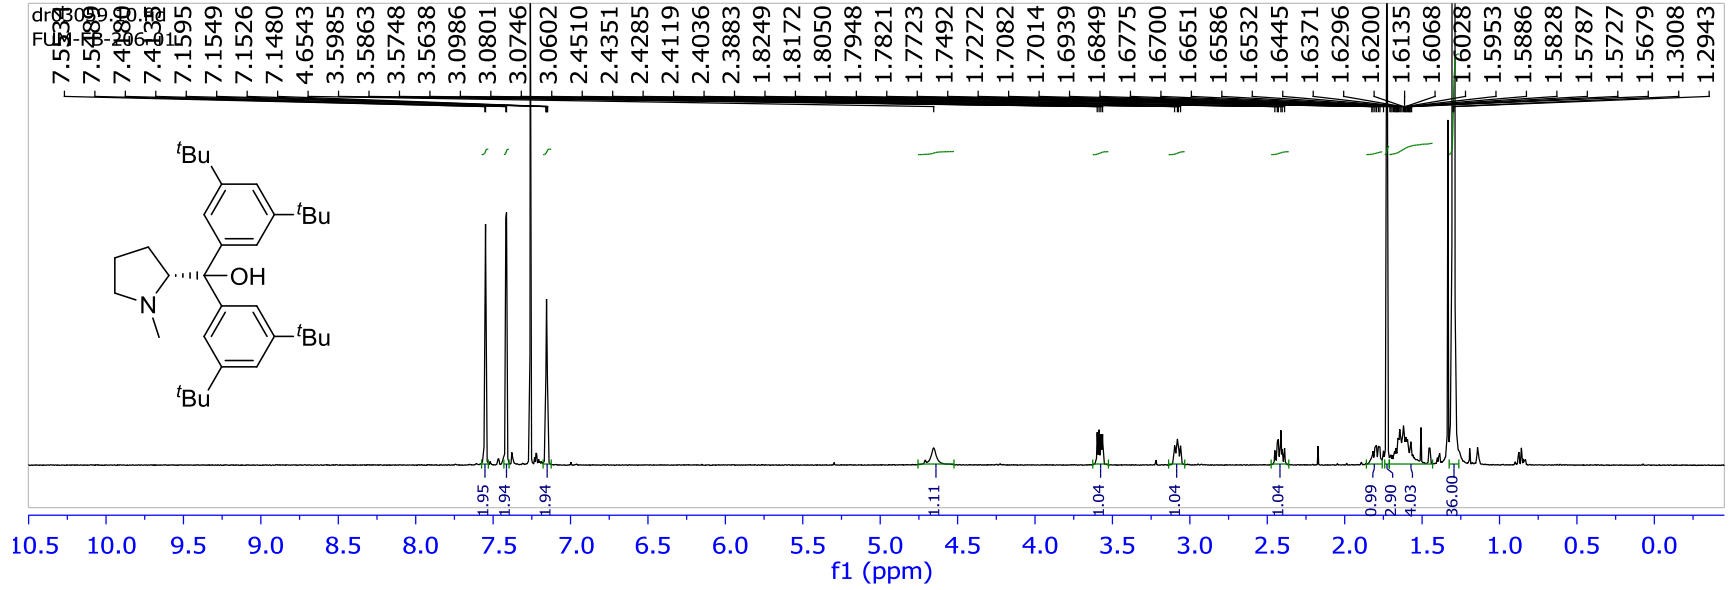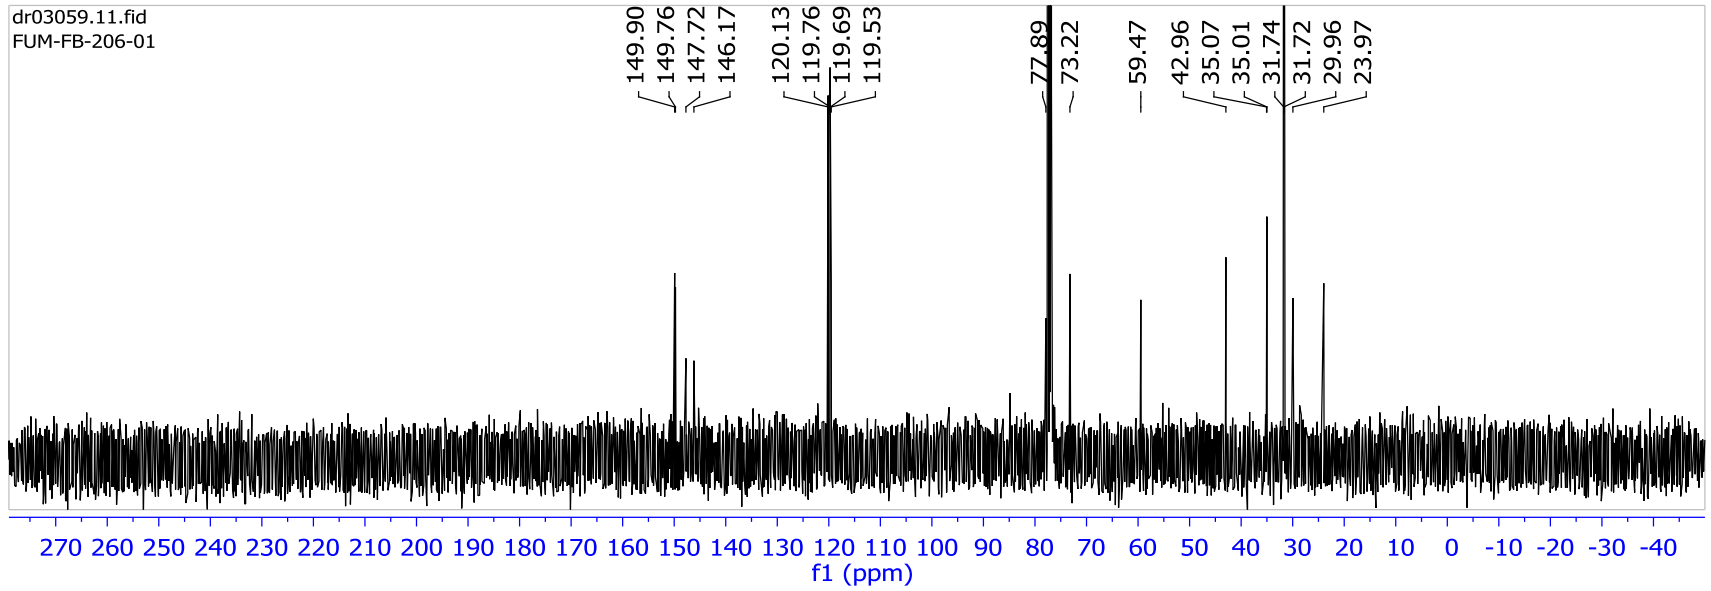

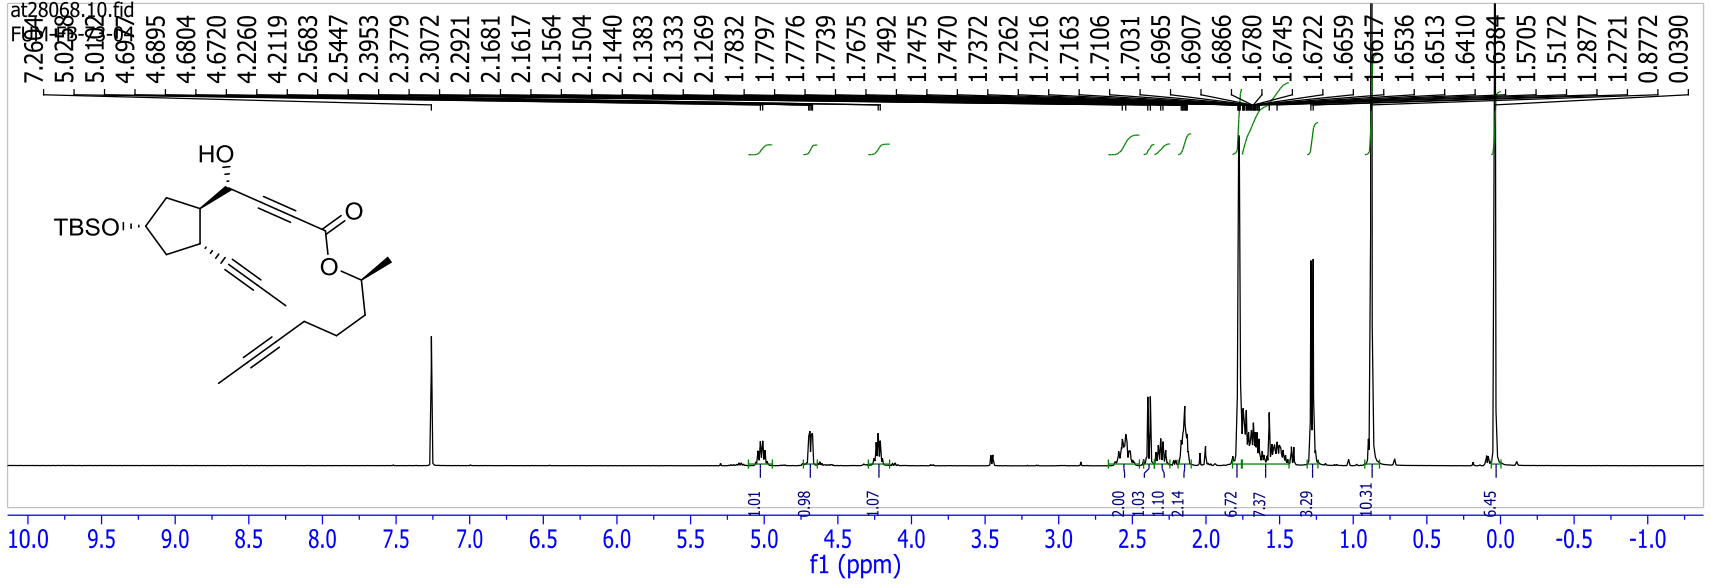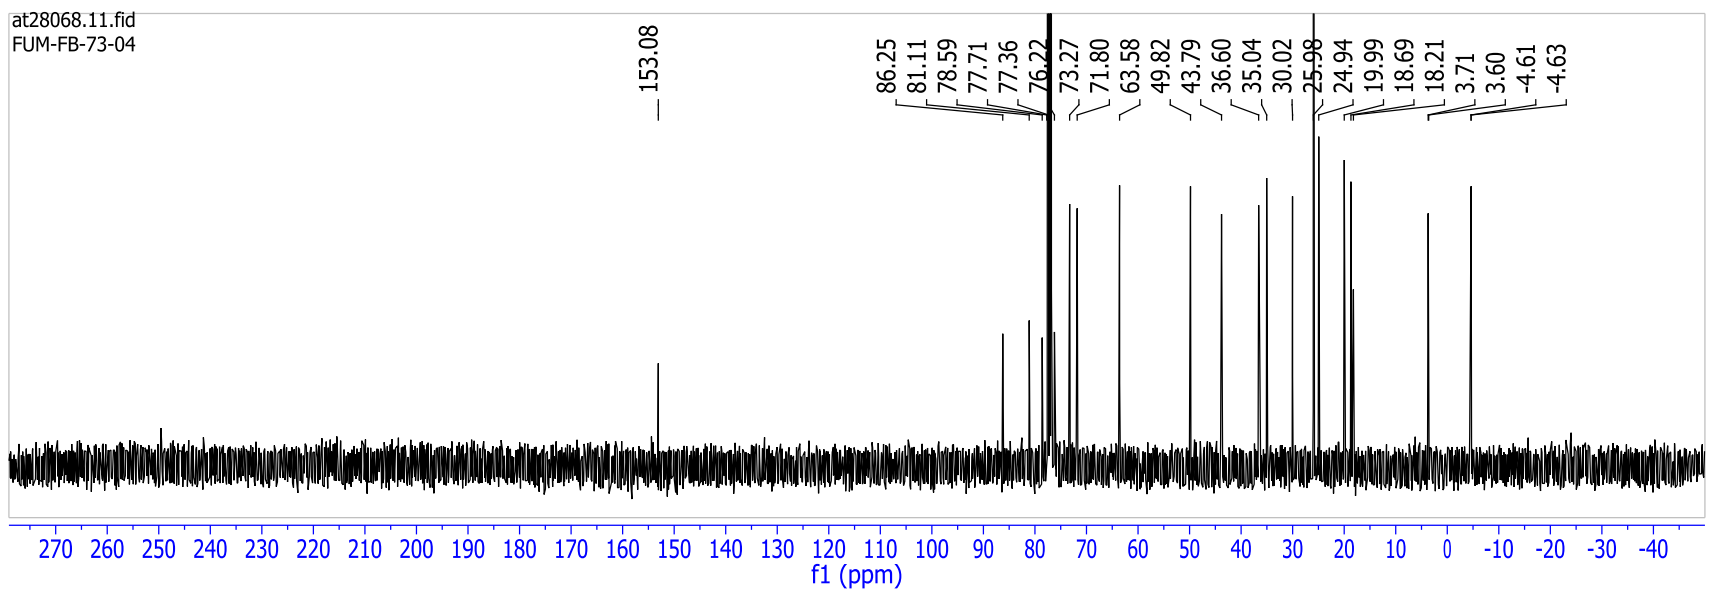

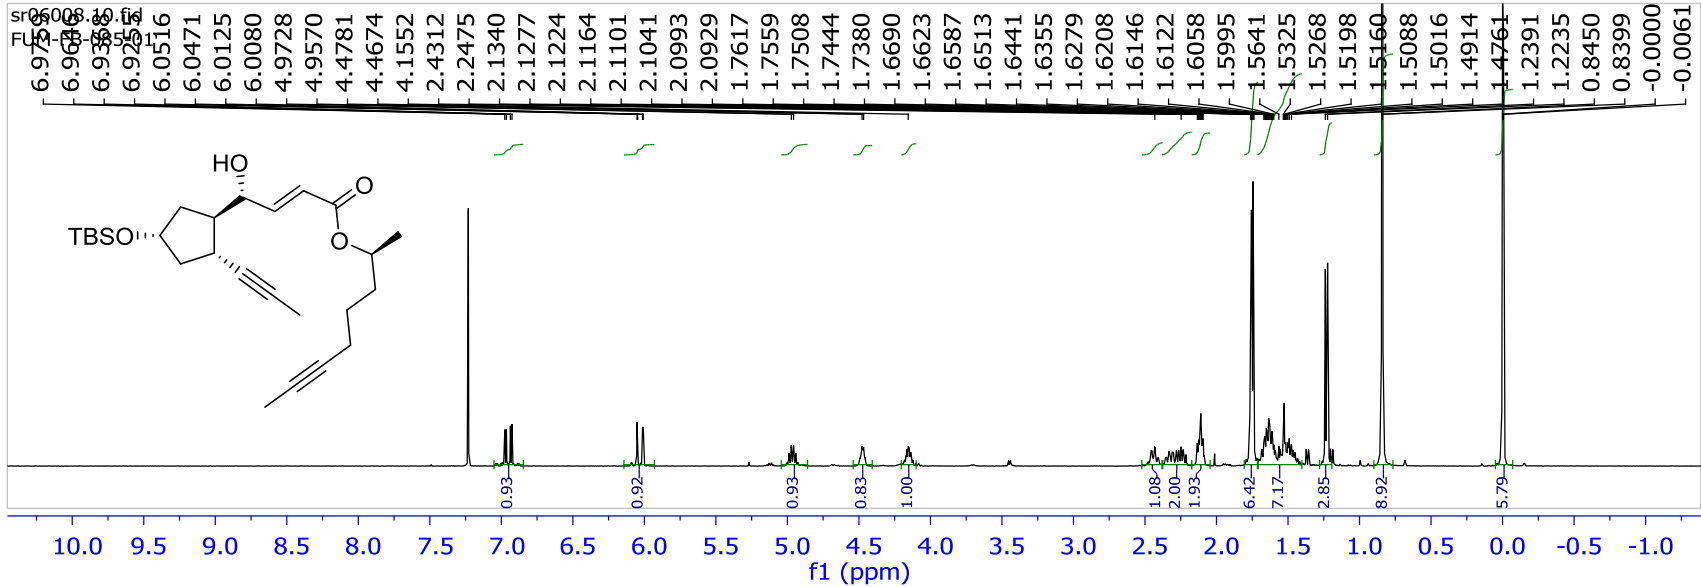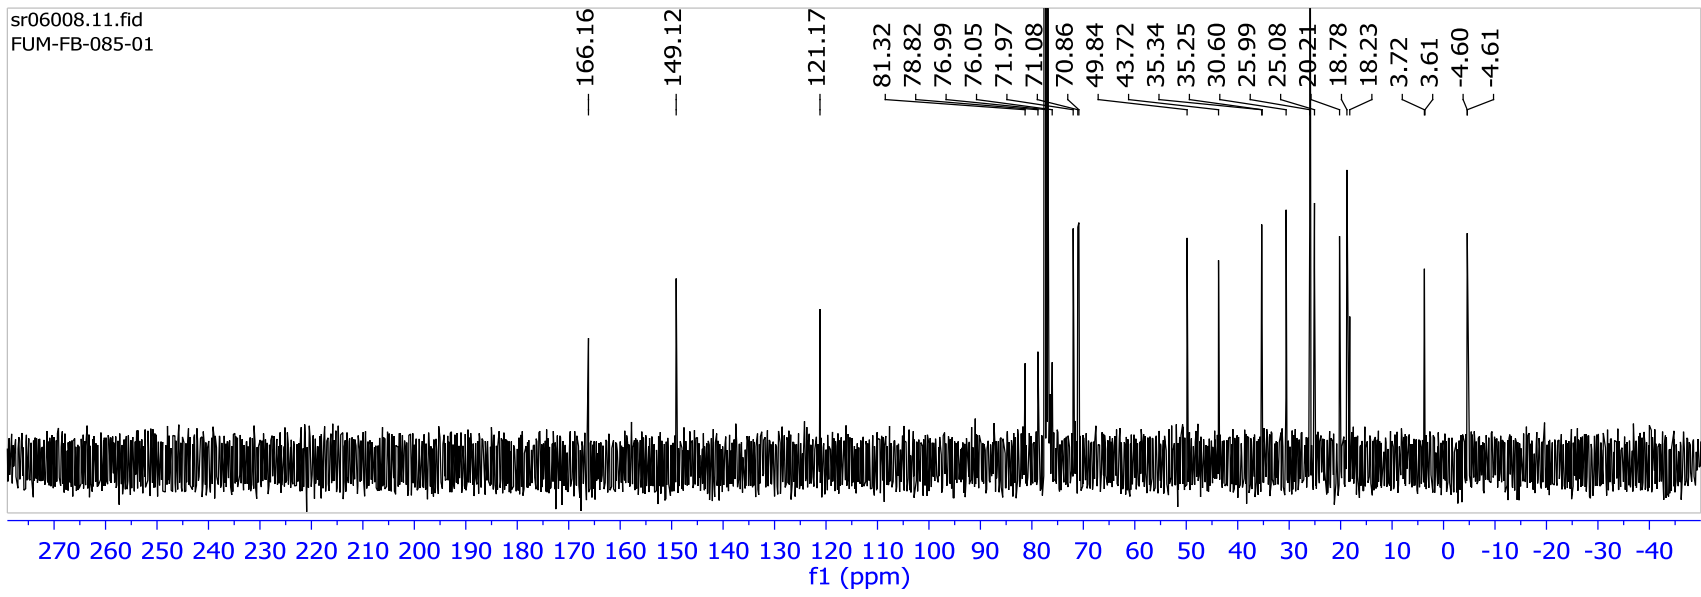

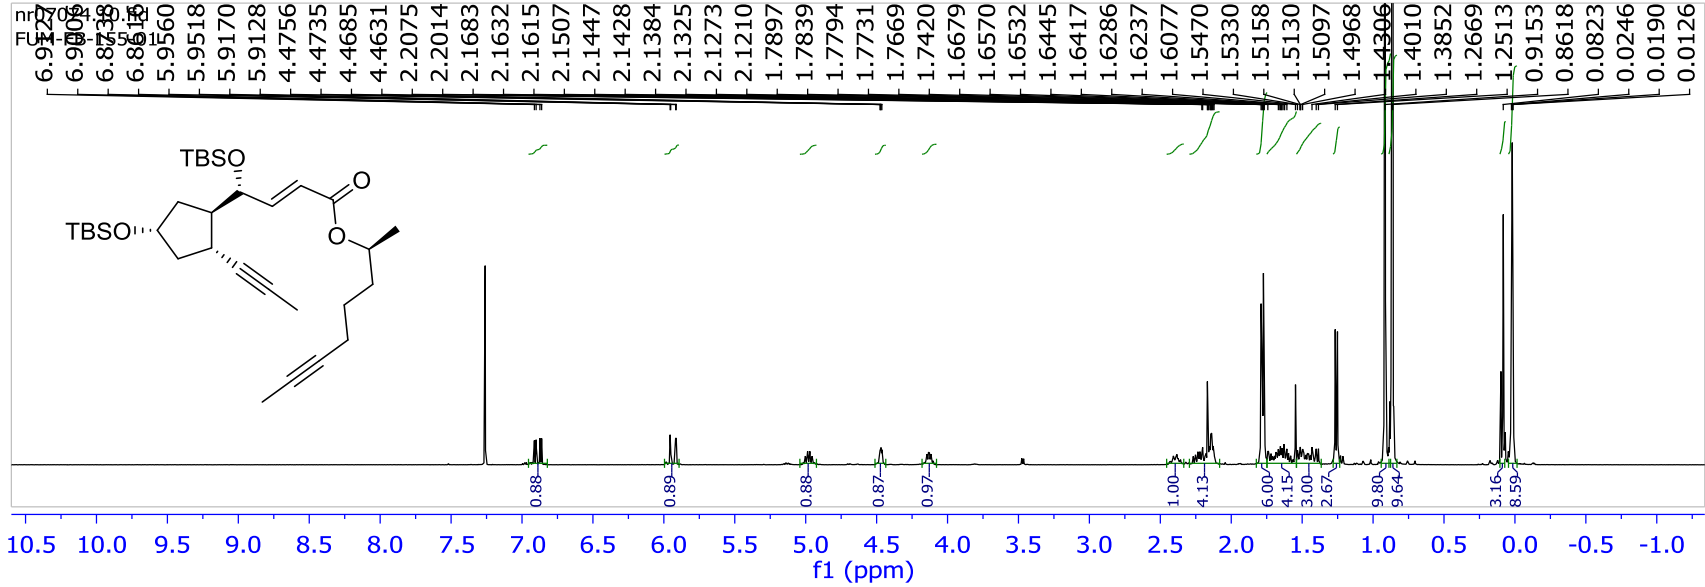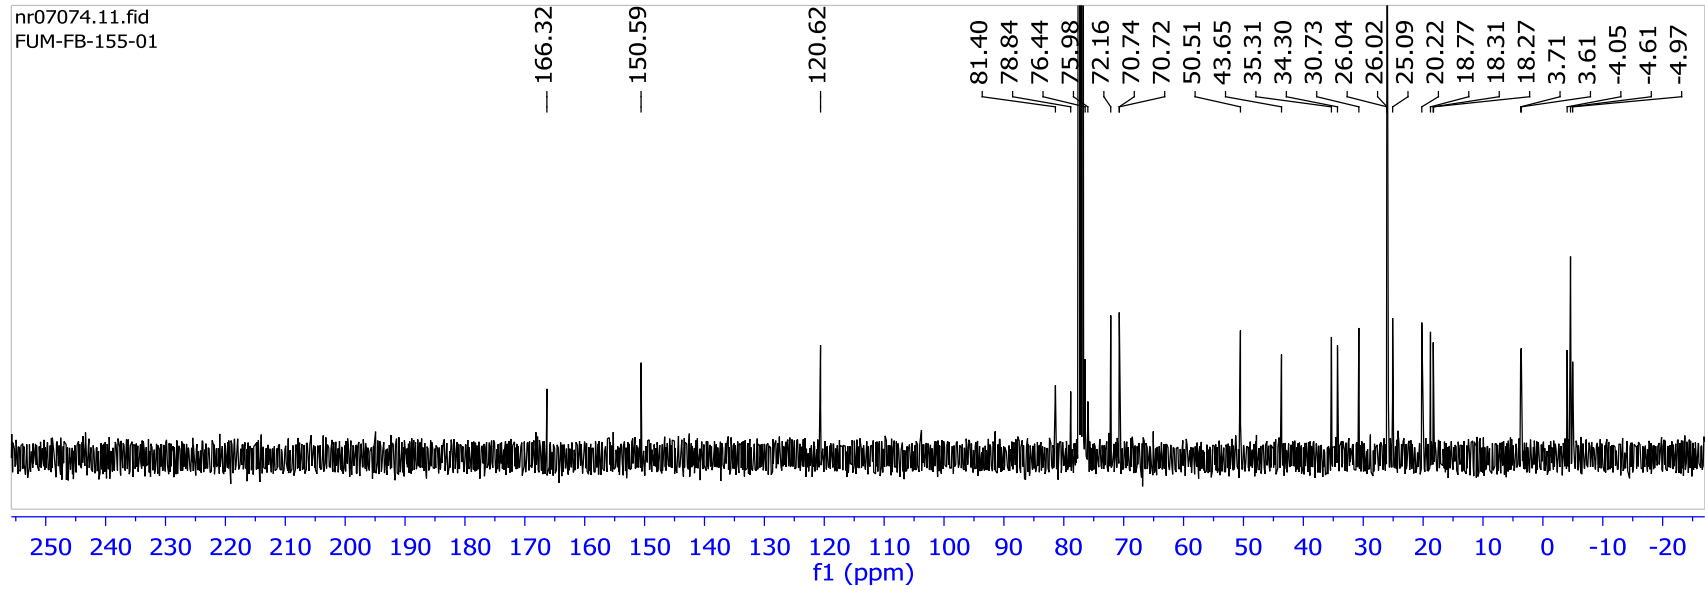

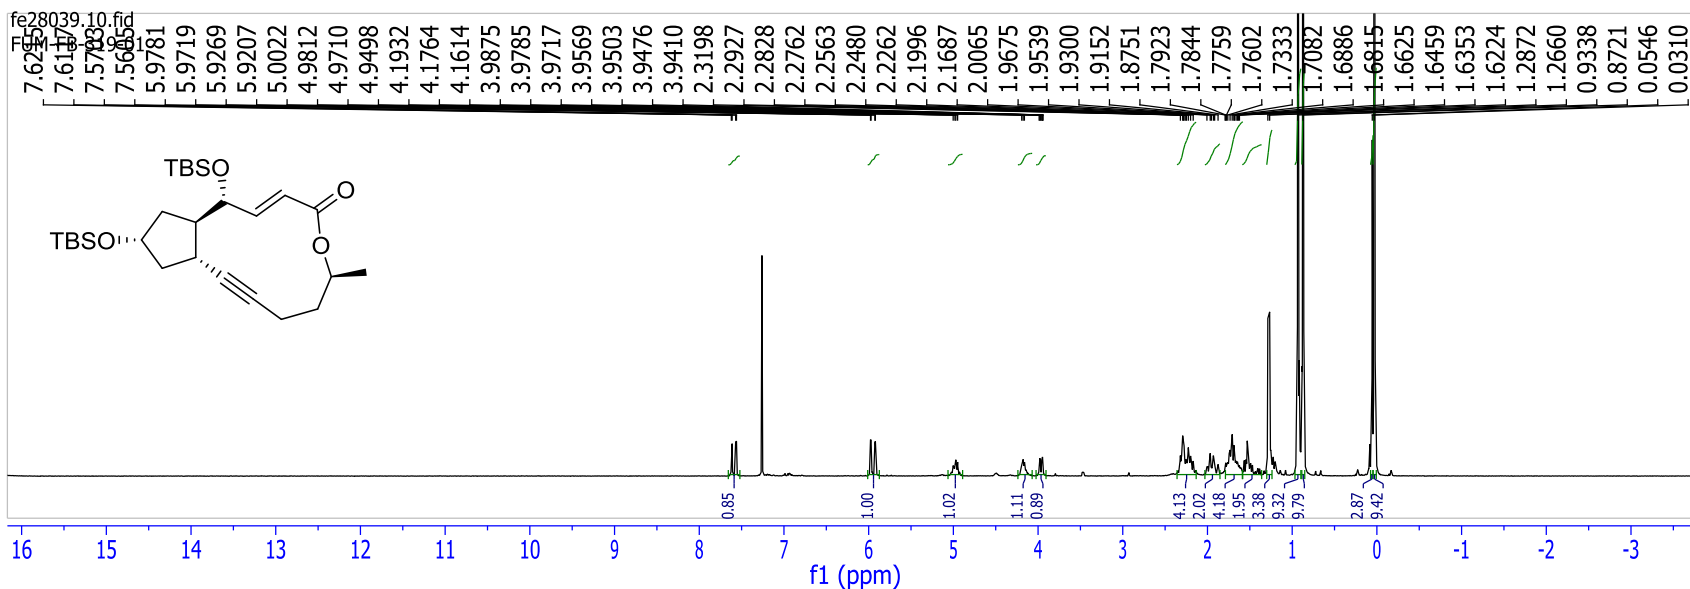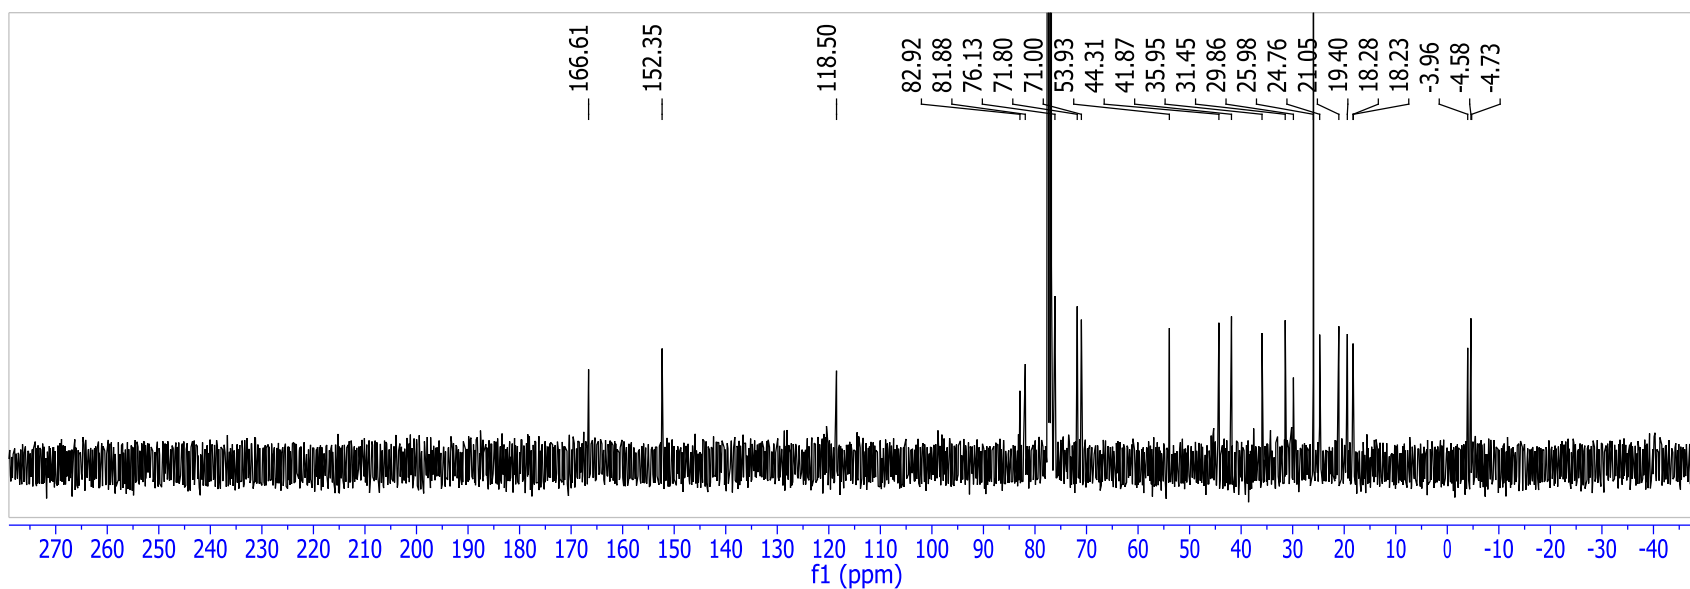

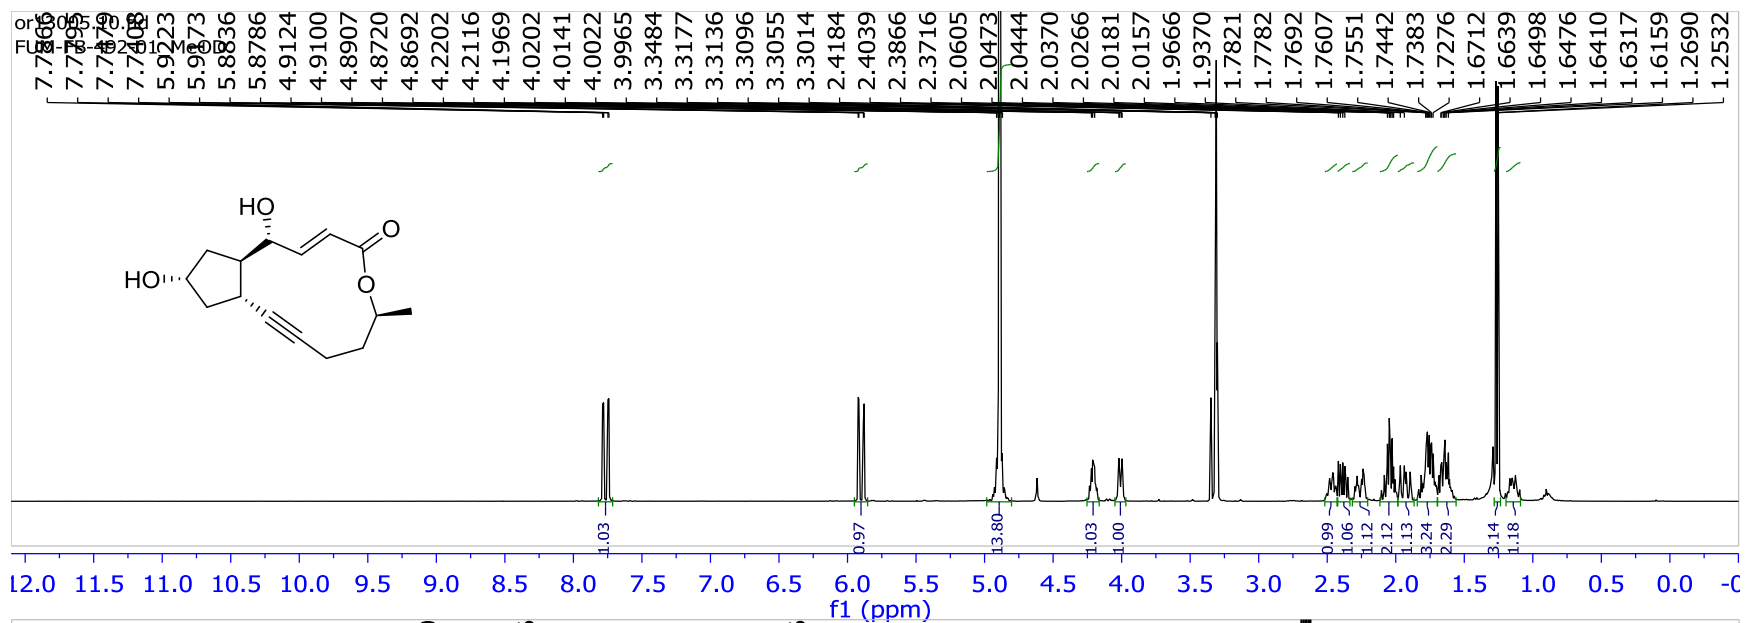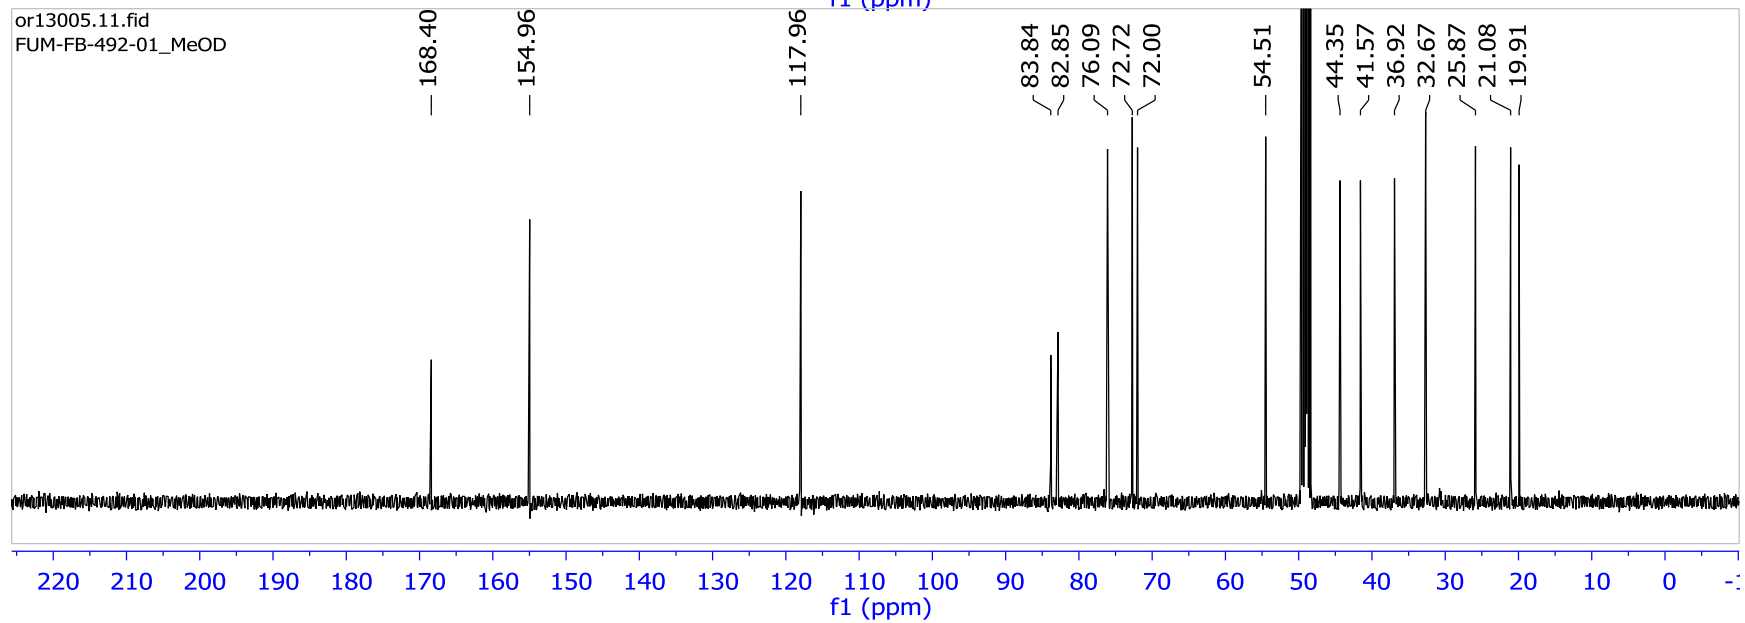

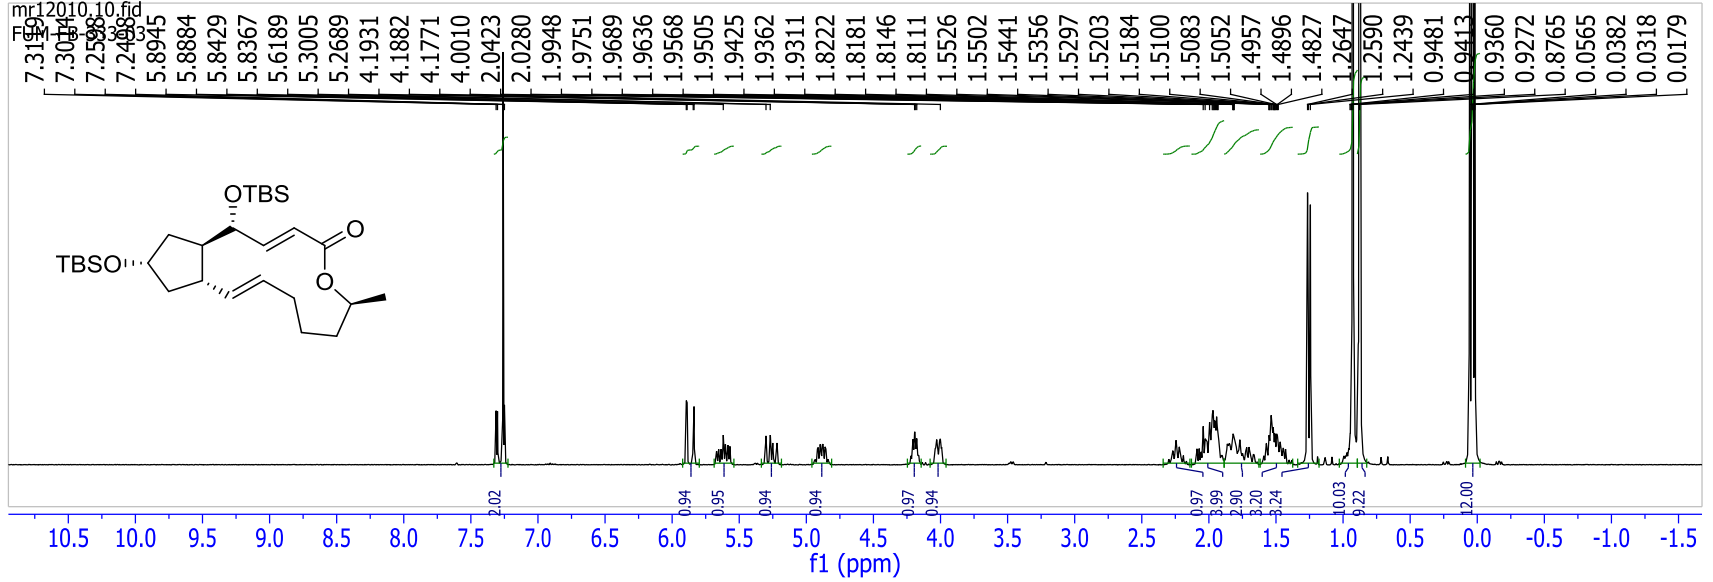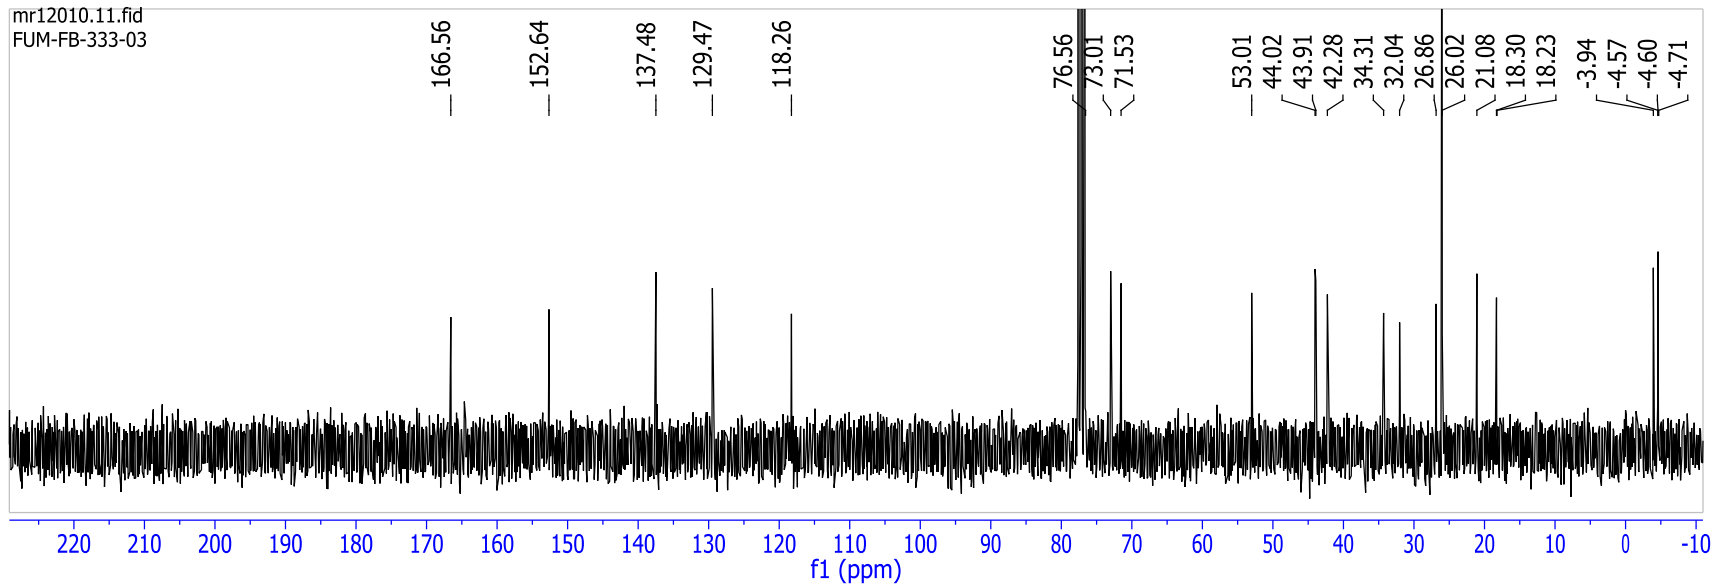

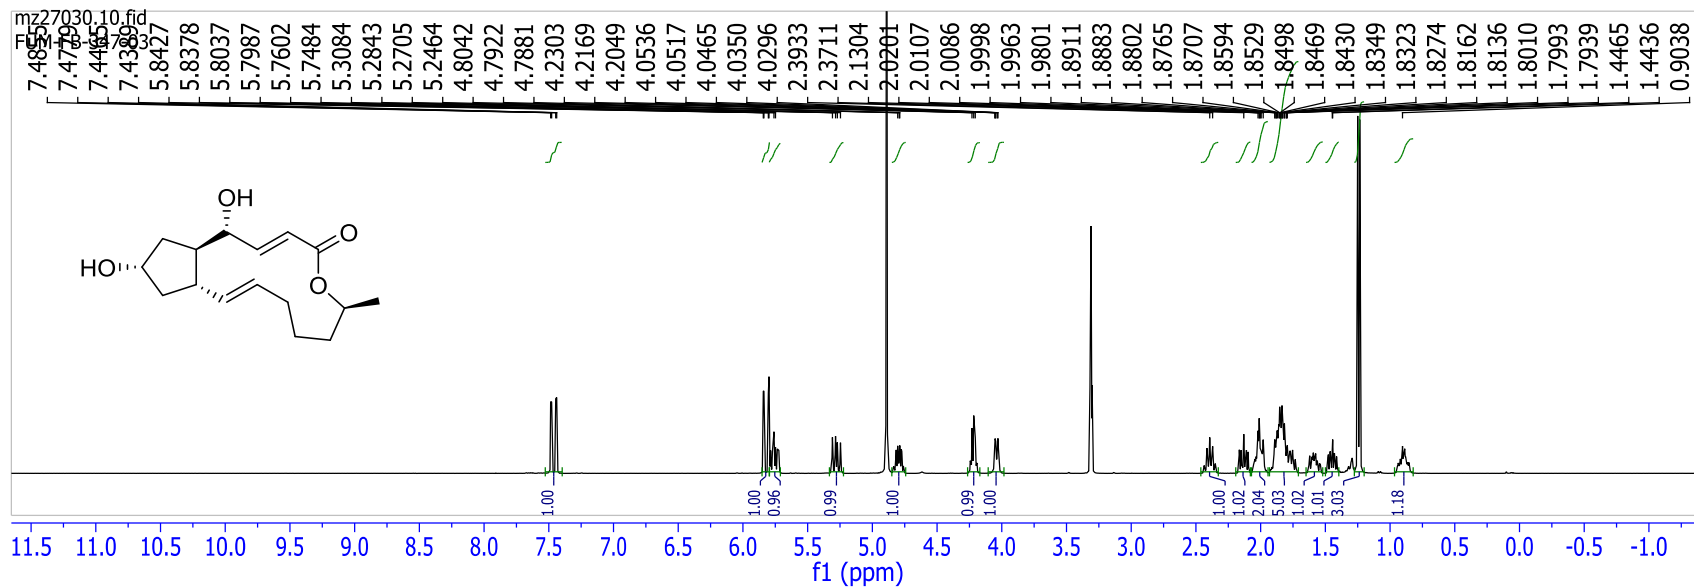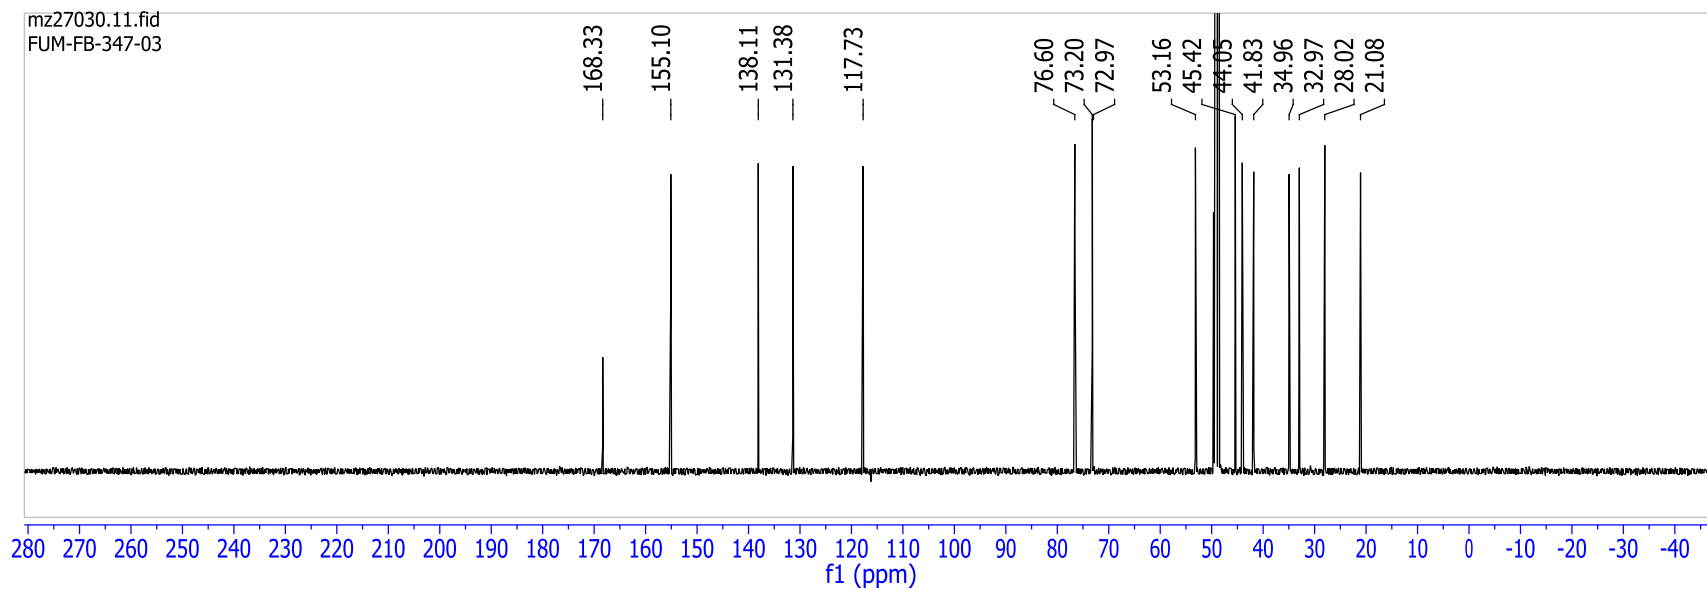

Supplement: anie0054-3978-sd1.pdf [file anie0054-3978-sd1.pdf]
